# Supplementary material for: De Novo Assembly, Annotation, and Characterization of Root Transcriptomes of Three Caladium Cultivars with a Focus on Necrotrophic Pathogen Resistance/Defense-Related Genes
Source: Int J Mol Sci. 2017 Mar 27;18(4):712. doi: 10.3390/ijms18040712 (PMC5412298; doi:10.3390/ijms18040712)
Supplement: Supplementary file 1 [file ijms-18-00712-s001.xlsx]

## Sheet: Table S1
Table S1. Length distribution of contigs in the assembled caladium root transcriptomes.
sample	number/percent	100-200nt	200-300nt	300-400nt	400-500nt	>=500nt	N50	Mean	All contig
CDD	number	172418	32585	13917	7606	28689	471	294	255215
	percent	0.6756	0.1277	0.0545	0.0298	0.1124
GGL	number	155212	29846	12730	7250	27295	492	299	232333
	percent	0.6681	0.1285	0.0548	0.0312	0.1175
MFT	number	174022	33073	14215	7913	28893	463	292	258116
	percent	0.6742	0.1281	0.0551	0.0307	0.1119
Note: CDD = 'Candidum'; GGL = 'Gingerland'; and MFT = 'Miss Muffet'.

## Sheet: Table S2
Table S2. Length distribution of unigenes in caladium root transcriptomes.
sample	number/percent	100-500nt	500-1000nt	1000-1500nt	1500-2000nt	>=2000nt	N50	Mean	All Unigene
CDD	number	83642	18571	11377	8135	12012	1525	729	133737
	percent	0.6254	0.1389	0.0851	0.0608	0.0898
GGL	number	75848	17706	10823	7460	11157	1514	736	122994
	percent	0.6167	0.144	0.088	0.0607	0.0907
MFT	number	85337	18891	11538	7960	11863	1487	717	135589
	percent	0.6294	0.1393	0.0851	0.0587	0.0875
All	number	63623	25938	16384	11712	19697	1755	999	137354
	percent	0.4632	0.1888	0.1193	0.0853	0.1434
Note: CDD = 'Candidum'; GGL = 'Gingerland'; and MFT = 'Miss Muffet'.

## Sheet: Table S3
Table S3. Summary of unigenes analyzed in Gene Ontology (GO) database
Ontology	Class	Number of unigenes
biological_process	biological adhesion	203
biological_process	biological regulation	10053
biological_process	cellular component organization or biogenesis	7261
biological_process	cellular process	28428
biological_process	developmental process	7743
biological_process	establishment of localization	7280
biological_process	growth	1463
biological_process	immune system process	1431
biological_process	localization	7585
biological_process	locomotion	37
biological_process	metabolic process	27380
biological_process	multi-organism process	3354
biological_process	multicellular organismal process	7752
biological_process	negative regulation of biological process	2064
biological_process	positive regulation of biological process	1900
biological_process	regulation of biological process	9083
biological_process	reproduction	4669
biological_process	reproductive process	4275
biological_process	response to stimulus	13019
biological_process	rhythmic process	234
biological_process	signaling	3391
biological_process	single-organism process	18997
cellular_component	cell	35952
cellular_component	cell junction	1228
cellular_component	cell part	35948
cellular_component	extracellular matrix	23
cellular_component	extracellular matrix part	12
cellular_component	extracellular region	2228
cellular_component	extracellular region part	22
cellular_component	macromolecular complex	5067
cellular_component	membrane	14605
cellular_component	membrane part	4901
cellular_component	membrane-enclosed lumen	1856
cellular_component	nucleoid	107
cellular_component	organelle	29813
cellular_component	organelle part	8633
cellular_component	symplast	1228
cellular_component	virion	9
cellular_component	virion part	9
molecular_function	antioxidant activity	381
molecular_function	binding	21486
molecular_function	catalytic activity	24305
molecular_function	channel regulator activity	4
molecular_function	electron carrier activity	614
molecular_function	enzyme regulator activity	460
molecular_function	metallochaperone activity	9
molecular_function	molecular transducer activity	530
molecular_function	nucleic acid binding transcription factor activity	787
molecular_function	nutrient reservoir activity	33
molecular_function	protein binding transcription factor activity	128
molecular_function	protein tag	5
molecular_function	receptor activity	268
molecular_function	structural molecule activity	1203
molecular_function	translation regulator activity	10
molecular_function	transporter activity	3322
Total		355415

## Sheet: Table S4
Table S4. Information of root -specific unigenes annotated in Gene Ontology (GO) database
geneID	geneLength	GO_BiologicalProcess	GO_MolecularFunction	Go_CellularComponent
Root development
CL10099.Contig1_All	887	GO:0048364//root development;GO:0006355//regulation of transcription, DNA-dependent;GO:0043481//anthocyanin accumulation in tissues in response to UV light	GO:0043565//sequence-specific DNA binding;GO:0003700//sequence-specific DNA binding transcription factor activity;GO:0050692//DBD domain binding	GO:0005634//nucleus
CL10099.Contig3_All	2103	GO:0048364//root development;GO:0006355//regulation of transcription, DNA-dependent;GO:0043481//anthocyanin accumulation in tissues in response to UV light	GO:0043565//sequence-specific DNA binding;GO:0003700//sequence-specific DNA binding transcription factor activity;GO:0050692//DBD domain binding	GO:0005634//nucleus
CL10099.Contig4_All	568	GO:0048364//root development;GO:0006355//regulation of transcription, DNA-dependent;GO:0043481//anthocyanin accumulation in tissues in response to UV light	GO:0043565//sequence-specific DNA binding;GO:0003700//sequence-specific DNA binding transcription factor activity;GO:0050692//DBD domain binding	GO:0005634//nucleus
CL10099.Contig5_All	347	GO:0048364//root development;GO:0006355//regulation of transcription, DNA-dependent;GO:0043481//anthocyanin accumulation in tissues in response to UV light	GO:0043565//sequence-specific DNA binding;GO:0003700//sequence-specific DNA binding transcription factor activity;GO:0050692//DBD domain binding	GO:0005634//nucleus
CL10330.Contig1_All	922	GO:0009630//gravitropism;GO:0048364//root development;GO:0006777//Mo-molybdopterin cofactor biosynthetic process;GO:0043085//positive regulation of catalytic activity;GO:0006879//cellular iron ion homeostasis;GO:0010497//plasmodesmata-mediated intercellular transport;GO:0048509//regulation of meristem development;GO:0045454//cell redox homeostasis;GO:0009555//pollen development;GO:0009658//chloro…	GO:0015035//protein disulfide oxidoreductase activity;GO:0009055//electron carrier activity;GO:0008047//enzyme activator activity;GO:0008559//xenobiotic-transporting ATPase activity;GO:0005524//ATP binding	GO:0009941//chloroplast envelope;GO:0005743//mitochondrial inner membrane;GO:0016021//integral to membrane;GO:0009570//chloroplast stroma
CL10330.Contig2_All	1037	GO:0009630//gravitropism;GO:0048364//root development;GO:0006777//Mo-molybdopterin cofactor biosynthetic process;GO:0043085//positive regulation of catalytic activity;GO:0006879//cellular iron ion homeostasis;GO:0010497//plasmodesmata-mediated intercellular transport;GO:0048509//regulation of meristem development;GO:0045454//cell redox homeostasis;GO:0009555//pollen development;GO:0009658//chloro…	GO:0015035//protein disulfide oxidoreductase activity;GO:0009055//electron carrier activity;GO:0008047//enzyme activator activity;GO:0008559//xenobiotic-transporting ATPase activity;GO:0005524//ATP binding	GO:0009941//chloroplast envelope;GO:0005743//mitochondrial inner membrane;GO:0016021//integral to membrane;GO:0009570//chloroplast stroma
CL10488.Contig4_All	1024	GO:0048364//root development;GO:0006887//exocytosis;GO:0009791//post-embryonic development	-	GO:0000145//exocyst;GO:0043227//membrane-bounded organelle;GO:0016020//membrane
CL10545.Contig2_All	1443	GO:0010267//production of ta-siRNAs involved in RNA interference;GO:0006346//methylation-dependent chromatin silencing;GO:0009965//leaf morphogenesis;GO:0048439//flower morphogenesis;GO:0010589//leaf proximal/distal pattern formation;GO:0048765//root hair cell differentiation;GO:0051301//cell division;GO:0006306//DNA methylation;GO:0009926//auxin polar transport;GO:0010072//primary shoot apical m…	GO:0004521//endoribonuclease activity;GO:0035197//siRNA binding;GO:0005515//protein binding;GO:0035198//miRNA binding	GO:0019898//extrinsic to membrane;GO:0005829//cytosol;GO:0005634//nucleus
CL10545.Contig3_All	1308	GO:0010267//production of ta-siRNAs involved in RNA interference;GO:0006346//methylation-dependent chromatin silencing;GO:0009965//leaf morphogenesis;GO:0048439//flower morphogenesis;GO:0010589//leaf proximal/distal pattern formation;GO:0048765//root hair cell differentiation;GO:0051301//cell division;GO:0035019//somatic stem cell maintenance;GO:0006306//DNA methylation;GO:0009926//auxin polar tr…	GO:0004521//endoribonuclease activity;GO:0003743//translation initiation factor activity;GO:0035197//siRNA binding;GO:0005515//protein binding;GO:0035198//miRNA binding	GO:0019898//extrinsic to membrane;GO:0005829//cytosol;GO:0005634//nucleus
CL10545.Contig4_All	1064	GO:0010267//production of ta-siRNAs involved in RNA interference;GO:0006346//methylation-dependent chromatin silencing;GO:0009965//leaf morphogenesis;GO:0048439//flower morphogenesis;GO:0010589//leaf proximal/distal pattern formation;GO:0048765//root hair cell differentiation;GO:0051301//cell division;GO:0006306//DNA methylation;GO:0009926//auxin polar transport;GO:0010072//primary shoot apical m…	GO:0004521//endoribonuclease activity;GO:0035197//siRNA binding;GO:0005515//protein binding;GO:0035198//miRNA binding	GO:0019898//extrinsic to membrane;GO:0005829//cytosol;GO:0005634//nucleus
CL10597.Contig3_All	1259	GO:0048768//root hair cell tip growth;GO:0042742//defense response to bacterium;GO:0001558//regulation of cell growth;GO:0009860//pollen tube growth;GO:0010252//auxin homeostasis;GO:0048527//lateral root development;GO:0008283//cell proliferation;GO:0046686//response to cadmium ion;GO:0040014//regulation of multicellular organism growth;GO:0007346//regulation of mitotic cell cycle;GO:0009790//emb…	-	GO:0009579//thylakoid;GO:0009507//chloroplast;GO:0090406//pollen tube;GO:0005634//nucleus;GO:0005886//plasma membrane;GO:0048046//apoplast
CL10623.Contig2_All	1893	GO:0044763;GO:0048830//adventitious root development;GO:0009733//response to auxin stimulus;GO:0009555//pollen development;GO:0050794//regulation of cellular process;GO:0006351//transcription, DNA-dependent;GO:0009653//anatomical structure morphogenesis	-	-
CL10623.Contig3_All	1856	GO:0048830//adventitious root development;GO:0006355//regulation of transcription, DNA-dependent;GO:0009555//pollen development;GO:0009653//anatomical structure morphogenesis;GO:0009734//auxin mediated signaling pathway	GO:0005488//binding;GO:0003700//sequence-specific DNA binding transcription factor activity	GO:0005634//nucleus
CL10623.Contig4_All	1556	GO:0044763;GO:0048830//adventitious root development;GO:0009733//response to auxin stimulus;GO:0009555//pollen development;GO:0050794//regulation of cellular process;GO:0006351//transcription, DNA-dependent;GO:0009653//anatomical structure morphogenesis	-	-
CL10767.Contig1_All	1841	GO:0009926//auxin polar transport;GO:0048589//developmental growth;GO:0048825//cotyledon development;GO:0048527//lateral root development;GO:0048765//root hair cell differentiation;GO:0009630//gravitropism	GO:0004672//protein kinase activity	-
CL10767.Contig2_All	1064	GO:0009987//cellular process;GO:0048364//root development;GO:0009926//auxin polar transport;GO:0048825//cotyledon development;GO:0009630//gravitropism	GO:0016301//kinase activity	-
CL10767.Contig3_All	1790	GO:0009926//auxin polar transport;GO:0048589//developmental growth;GO:0048825//cotyledon development;GO:0048527//lateral root development;GO:0048765//root hair cell differentiation;GO:0009630//gravitropism	GO:0004672//protein kinase activity	-
CL1135.Contig2_All	1242	GO:0048364//root development;GO:0030154//cell differentiation;GO:0009653//anatomical structure morphogenesis	-	-
CL12088.Contig1_All	1915	GO:0016036//cellular response to phosphate starvation;GO:0006427//histidyl-tRNA aminoacylation;GO:0006355//regulation of transcription, DNA-dependent;GO:0080022//primary root development;GO:0000041//transition metal ion transport	GO:0004821//histidine-tRNA ligase activity;GO:0008026//ATP-dependent helicase activity;GO:0003677//DNA binding;GO:0003700//sequence-specific DNA binding transcription factor activity;GO:0003725//double-stranded RNA binding;GO:0005524//ATP binding	GO:0009507//chloroplast;GO:0005634//nucleus;GO:0005739//mitochondrion
CL12088.Contig2_All	1871	GO:0016036//cellular response to phosphate starvation;GO:0006427//histidyl-tRNA aminoacylation;GO:0006355//regulation of transcription, DNA-dependent;GO:0080022//primary root development;GO:0000041//transition metal ion transport	GO:0004821//histidine-tRNA ligase activity;GO:0008026//ATP-dependent helicase activity;GO:0003677//DNA binding;GO:0003700//sequence-specific DNA binding transcription factor activity;GO:0003725//double-stranded RNA binding;GO:0005524//ATP binding	GO:0009507//chloroplast;GO:0005634//nucleus;GO:0005739//mitochondrion
CL12304.Contig1_All	1815	GO:0009987//cellular process;GO:0050896//response to stimulus;GO:0009888//tissue development;GO:0048364//root development;GO:0009908//flower development;GO:0065007//biological regulation;GO:0008152//metabolic process;GO:0009793//embryo development ending in seed dormancy	GO:0016846//carbon-sulfur lyase activity	-
CL12304.Contig2_All	1827	GO:0009908//flower development;GO:0048364//root development;GO:0009888//tissue development;GO:0009793//embryo development ending in seed dormancy;GO:0048827//phyllome development;GO:0009628//response to abiotic stimulus;GO:0009987//cellular process;GO:0065007//biological regulation;GO:0008152//metabolic process	GO:0016846//carbon-sulfur lyase activity;GO:0008483//transaminase activity	-
CL12304.Contig3_All	1601	GO:0009908//flower development;GO:0048364//root development;GO:0009888//tissue development;GO:0009793//embryo development ending in seed dormancy;GO:0048827//phyllome development;GO:0009628//response to abiotic stimulus;GO:0009987//cellular process;GO:0065007//biological regulation;GO:0008152//metabolic process	GO:0016846//carbon-sulfur lyase activity;GO:0008483//transaminase activity	-
CL12348.Contig3_All	2389	GO:0000278//mitotic cell cycle;GO:0048364//root development;GO:0009880//embryonic pattern specification;GO:0009749//response to glucose stimulus;GO:0050826//response to freezing;GO:0009755//hormone-mediated signaling pathway;GO:0048825//cotyledon development;GO:0050832//defense response to fungus;GO:0051301//cell division;GO:0042742//defense response to bacterium;GO:0045892//negative regulation o…	GO:0005515//protein binding;GO:0000166//nucleotide binding	GO:0080008//Cul4-RING ubiquitin ligase complex;GO:0005634//nucleus
CL12348.Contig4_All	2465	GO:0000278//mitotic cell cycle;GO:0048364//root development;GO:0009880//embryonic pattern specification;GO:0009749//response to glucose stimulus;GO:0050826//response to freezing;GO:0009755//hormone-mediated signaling pathway;GO:0048825//cotyledon development;GO:0050832//defense response to fungus;GO:0051301//cell division;GO:0042742//defense response to bacterium;GO:0045892//negative regulation o…	GO:0005515//protein binding;GO:0000166//nucleotide binding	GO:0080008//Cul4-RING ubiquitin ligase complex;GO:0005634//nucleus
CL12348.Contig5_All	769	GO:0000278//mitotic cell cycle;GO:0048364//root development;GO:0009880//embryonic pattern specification;GO:0009749//response to glucose stimulus;GO:0050826//response to freezing;GO:0009755//hormone-mediated signaling pathway;GO:0048825//cotyledon development;GO:0050832//defense response to fungus;GO:0051301//cell division;GO:0042742//defense response to bacterium;GO:0045892//negative regulation o…	GO:0005515//protein binding	GO:0080008//Cul4-RING ubiquitin ligase complex;GO:0005634//nucleus
CL12351.Contig1_All	1276	GO:0031047//gene silencing by RNA;GO:0048364//root development;GO:0010048//vernalization response;GO:0009825//multidimensional cell growth;GO:0009910//negative regulation of flower development;GO:0016569//covalent chromatin modification;GO:0010016//shoot system morphogenesis;GO:0048573//photoperiodism, flowering;GO:0006342//chromatin silencing;GO:0045857//negative regulation of molecular function…	GO:0003677//DNA binding;GO:0035064//methylated histone residue binding	GO:0000791//euchromatin;GO:0005720//nuclear heterochromatin
CL12351.Contig2_All	1352	GO:0031047//gene silencing by RNA;GO:0048364//root development;GO:0010048//vernalization response;GO:0009825//multidimensional cell growth;GO:0009910//negative regulation of flower development;GO:0016569//covalent chromatin modification;GO:0010016//shoot system morphogenesis;GO:0048573//photoperiodism, flowering;GO:0006342//chromatin silencing;GO:0045857//negative regulation of molecular function…	GO:0003677//DNA binding;GO:0035064//methylated histone residue binding	GO:0000791//euchromatin;GO:0005720//nuclear heterochromatin
CL12660.Contig1_All	434	GO:0000911//cytokinesis by cell plate formation;GO:0010048//vernalization response;GO:0000413//protein peptidyl-prolyl isomerization;GO:0006457//protein folding;GO:0009880//embryonic pattern specification;GO:0009735//response to cytokinin stimulus;GO:0000226//microtubule cytoskeleton organization;GO:0030154//cell differentiation;GO:0030010//establishment of cell polarity;GO:0048527//lateral root …	GO:0003755//peptidyl-prolyl cis-trans isomerase activity;GO:0005528//FK506 binding;GO:0005515//protein binding	GO:0005829//cytosol;GO:0016020//membrane;GO:0005783//endoplasmic reticulum;GO:0005634//nucleus
CL12660.Contig2_All	485	GO:0000911//cytokinesis by cell plate formation;GO:0010048//vernalization response;GO:0000413//protein peptidyl-prolyl isomerization;GO:0006457//protein folding;GO:0009880//embryonic pattern specification;GO:0009735//response to cytokinin stimulus;GO:0000226//microtubule cytoskeleton organization;GO:0030154//cell differentiation;GO:0030010//establishment of cell polarity;GO:0048527//lateral root …	GO:0003755//peptidyl-prolyl cis-trans isomerase activity;GO:0005528//FK506 binding;GO:0005515//protein binding	GO:0005829//cytosol;GO:0016020//membrane;GO:0005783//endoplasmic reticulum;GO:0005634//nucleus
CL12849.Contig1_All	1929	GO:0009630//gravitropism;GO:0048364//root development;GO:0006777//Mo-molybdopterin cofactor biosynthetic process;GO:0043085//positive regulation of catalytic activity;GO:0006879//cellular iron ion homeostasis;GO:0010497//plasmodesmata-mediated intercellular transport;GO:0048509//regulation of meristem development;GO:0045454//cell redox homeostasis;GO:0009555//pollen development;GO:0009658//chloro…	GO:0015035//protein disulfide oxidoreductase activity;GO:0009055//electron carrier activity;GO:0008047//enzyme activator activity;GO:0008559//xenobiotic-transporting ATPase activity;GO:0005524//ATP binding	GO:0009941//chloroplast envelope;GO:0005743//mitochondrial inner membrane;GO:0016021//integral to membrane;GO:0009570//chloroplast stroma
CL12849.Contig2_All	1976	GO:0009630//gravitropism;GO:0048364//root development;GO:0006777//Mo-molybdopterin cofactor biosynthetic process;GO:0043085//positive regulation of catalytic activity;GO:0006879//cellular iron ion homeostasis;GO:0010497//plasmodesmata-mediated intercellular transport;GO:0048509//regulation of meristem development;GO:0045454//cell redox homeostasis;GO:0009555//pollen development;GO:0009658//chloro…	GO:0015035//protein disulfide oxidoreductase activity;GO:0009055//electron carrier activity;GO:0008047//enzyme activator activity;GO:0008559//xenobiotic-transporting ATPase activity;GO:0005524//ATP binding	GO:0009941//chloroplast envelope;GO:0005743//mitochondrial inner membrane;GO:0016021//integral to membrane;GO:0009570//chloroplast stroma
CL12849.Contig3_All	2558	GO:0009630//gravitropism;GO:0048364//root development;GO:0006777//Mo-molybdopterin cofactor biosynthetic process;GO:0043085//positive regulation of catalytic activity;GO:0006879//cellular iron ion homeostasis;GO:0010497//plasmodesmata-mediated intercellular transport;GO:0048509//regulation of meristem development;GO:0045454//cell redox homeostasis;GO:0009555//pollen development;GO:0009658//chloro…	GO:0008047//enzyme activator activity;GO:0008559//xenobiotic-transporting ATPase activity;GO:0005524//ATP binding	GO:0009941//chloroplast envelope;GO:0005743//mitochondrial inner membrane;GO:0016021//integral to membrane;GO:0009570//chloroplast stroma
CL12849.Contig4_All	2511	GO:0009630//gravitropism;GO:0048364//root development;GO:0006777//Mo-molybdopterin cofactor biosynthetic process;GO:0043085//positive regulation of catalytic activity;GO:0006879//cellular iron ion homeostasis;GO:0010497//plasmodesmata-mediated intercellular transport;GO:0048509//regulation of meristem development;GO:0045454//cell redox homeostasis;GO:0009555//pollen development;GO:0009658//chloro…	GO:0015035//protein disulfide oxidoreductase activity;GO:0009055//electron carrier activity;GO:0008047//enzyme activator activity;GO:0008559//xenobiotic-transporting ATPase activity;GO:0005524//ATP binding	GO:0009941//chloroplast envelope;GO:0005743//mitochondrial inner membrane;GO:0016021//integral to membrane;GO:0009570//chloroplast stroma
CL13259.Contig1_All	208	GO:0048364//root development;GO:0050826//response to freezing;GO:0009793//embryo development ending in seed dormancy;GO:0060771//phyllotactic patterning;GO:0006355//regulation of transcription, DNA-dependent;GO:0009640//photomorphogenesis;GO:0019915//lipid storage;GO:0010182//sugar mediated signaling pathway;GO:0009933//meristem structural organization;GO:0016567//protein ubiquitination;GO:004001…	GO:0003677//DNA binding;GO:0003700//sequence-specific DNA binding transcription factor activity	GO:0005634//nucleus
CL1362.Contig1_All	3799	GO:0006346//methylation-dependent chromatin silencing;GO:0016246//RNA interference;GO:0050826//response to freezing;GO:0009793//embryo development ending in seed dormancy;GO:0009855//determination of bilateral symmetry;GO:0009640//photomorphogenesis;GO:0019915//lipid storage;GO:0010182//sugar mediated signaling pathway;GO:0016567//protein ubiquitination;GO:0009845//seed germination;GO:0010228//ve…	-	GO:0005730//nucleolus
CL1362.Contig2_All	3805	GO:0006346//methylation-dependent chromatin silencing;GO:0016246//RNA interference;GO:0050826//response to freezing;GO:0009793//embryo development ending in seed dormancy;GO:0009855//determination of bilateral symmetry;GO:0009640//photomorphogenesis;GO:0019915//lipid storage;GO:0010182//sugar mediated signaling pathway;GO:0016567//protein ubiquitination;GO:0009845//seed germination;GO:0010228//ve…	-	GO:0005730//nucleolus
CL13717.Contig1_All	1756	GO:0048527//lateral root development	GO:0005515//protein binding;GO:0004842//ubiquitin-protein ligase activity	GO:0005634//nucleus
CL13717.Contig2_All	1863	GO:0048527//lateral root development	GO:0005515//protein binding;GO:0004842//ubiquitin-protein ligase activity	GO:0005634//nucleus
CL13880.Contig1_All	1975	GO:0009845//seed germination;GO:0009867//jasmonic acid mediated signaling pathway;GO:0010154//fruit development;GO:0009887//organ morphogenesis;GO:0030968//endoplasmic reticulum unfolded protein response;GO:0009817//defense response to fungus, incompatible interaction;GO:0048527//lateral root development;GO:0009723//response to ethylene stimulus;GO:0007186//G-protein coupled receptor signaling pa…	GO:0004871//signal transducer activity	GO:0080008//Cul4-RING ubiquitin ligase complex;GO:0005783//endoplasmic reticulum;GO:0005886//plasma membrane
CL13880.Contig2_All	1833	GO:0009845//seed germination;GO:0009867//jasmonic acid mediated signaling pathway;GO:0010154//fruit development;GO:0009887//organ morphogenesis;GO:0030968//endoplasmic reticulum unfolded protein response;GO:0009817//defense response to fungus, incompatible interaction;GO:0048527//lateral root development;GO:0016573//histone acetylation;GO:0009723//response to ethylene stimulus;GO:0007186//G-prote…	GO:0004871//signal transducer activity;GO:0004402//histone acetyltransferase activity	GO:0080008//Cul4-RING ubiquitin ligase complex;GO:0005783//endoplasmic reticulum;GO:0005886//plasma membrane
CL13911.Contig1_All	1087	GO:0046939//nucleotide phosphorylation;GO:0048364//root development;GO:0048367//shoot system development;GO:0008652//cellular amino acid biosynthetic process	GO:0004017//adenylate kinase activity;GO:0005524//ATP binding	GO:0005739//mitochondrion;GO:0009570//chloroplast stroma;GO:0005634//nucleus
CL13911.Contig2_All	854	GO:0046939//nucleotide phosphorylation;GO:0048364//root development;GO:0048367//shoot system development;GO:0008652//cellular amino acid biosynthetic process	GO:0004017//adenylate kinase activity;GO:0005524//ATP binding	GO:0005739//mitochondrion;GO:0009570//chloroplast stroma;GO:0005634//nucleus
CL14262.Contig1_All	384	GO:0006862//nucleotide transport;GO:0030243//cellulose metabolic process;GO:0006944//cellular membrane fusion;GO:0010363//regulation of plant-type hypersensitive response;GO:0015802//basic amino acid transport;GO:0006612//protein targeting to membrane;GO:0043069//negative regulation of programmed cell death;GO:0043090//amino acid import;GO:0030036//actin cytoskeleton organization;GO:0015696//ammo…	GO:0005525//GTP binding;GO:0016817//hydrolase activity, acting on acid anhydrides	GO:0005774//vacuolar membrane;GO:0016021//integral to membrane;GO:0005783//endoplasmic reticulum;GO:0005886//plasma membrane;GO:0005634//nucleus
CL14262.Contig2_All	460	GO:0006862//nucleotide transport;GO:0030243//cellulose metabolic process;GO:0006944//cellular membrane fusion;GO:0010363//regulation of plant-type hypersensitive response;GO:0015802//basic amino acid transport;GO:0006612//protein targeting to membrane;GO:0043069//negative regulation of programmed cell death;GO:0043090//amino acid import;GO:0030036//actin cytoskeleton organization;GO:0015696//ammo…	GO:0005525//GTP binding;GO:0016817//hydrolase activity, acting on acid anhydrides	GO:0005774//vacuolar membrane;GO:0016021//integral to membrane;GO:0005783//endoplasmic reticulum;GO:0005886//plasma membrane;GO:0005634//nucleus
CL14418.Contig1_All	1359	GO:0048364//root development;GO:0030154//cell differentiation;GO:0009653//anatomical structure morphogenesis	-	-
CL14597.Contig1_All	3508	GO:0048364//root development;GO:0009755//hormone-mediated signaling pathway;GO:0045892//negative regulation of transcription, DNA-dependent;GO:1901700;GO:0033993//response to lipid	GO:0003676//nucleic acid binding;GO:0046872//metal ion binding;GO:0004386//helicase activity;GO:0016887//ATPase activity	-
CL14597.Contig2_All	4596	GO:0048364//root development;GO:0009755//hormone-mediated signaling pathway;GO:0045892//negative regulation of transcription, DNA-dependent;GO:1901700;GO:0033993//response to lipid	GO:0003676//nucleic acid binding;GO:0046872//metal ion binding;GO:0004386//helicase activity;GO:0016887//ATPase activity	-
CL14597.Contig3_All	4944	GO:0048364//root development;GO:0009755//hormone-mediated signaling pathway;GO:0045892//negative regulation of transcription, DNA-dependent;GO:1901700;GO:0033993//response to lipid	GO:1901363;GO:0046872//metal ion binding;GO:0004386//helicase activity;GO:0097159//organic cyclic compound binding	-
CL14597.Contig4_All	2308	GO:0009788//negative regulation of abscisic acid mediated signaling pathway;GO:0009739//response to gibberellin stimulus;GO:0016458//gene silencing;GO:2000023//regulation of lateral root development;GO:0008283//cell proliferation;GO:0045892//negative regulation of transcription, DNA-dependent;GO:0009736//cytokinin mediated signaling pathway;GO:0016568//chromatin modification;GO:0009733//response …	GO:0046914//transition metal ion binding;GO:0003676//nucleic acid binding;GO:0004386//helicase activity;GO:0016887//ATPase activity	GO:0005634//nucleus
CL1465.Contig1_All	5301	GO:2000069//regulation of post-embryonic root development;GO:0009750//response to fructose stimulus;GO:0009744//response to sucrose stimulus;GO:0046777//protein autophosphorylation;GO:0048510//regulation of timing of transition from vegetative to reproductive phase;GO:0010182//sugar mediated signaling pathway;GO:0010105//negative regulation of ethylene mediated signaling pathway;GO:0009686//gibbe…	GO:0005515//protein binding;GO:0004674//protein serine/threonine kinase activity	GO:0005789//endoplasmic reticulum membrane
CL1465.Contig2_All	4915	GO:2000069//regulation of post-embryonic root development;GO:0009750//response to fructose stimulus;GO:0009744//response to sucrose stimulus;GO:0046777//protein autophosphorylation;GO:0048510//regulation of timing of transition from vegetative to reproductive phase;GO:0010182//sugar mediated signaling pathway;GO:0000165//MAPK cascade;GO:0010105//negative regulation of ethylene mediated signaling …	GO:0005515//protein binding;GO:0004712//protein serine/threonine/tyrosine kinase activity;GO:0004674//protein serine/threonine kinase activity	GO:0005789//endoplasmic reticulum membrane;GO:0005634//nucleus
CL14979.Contig1_All	1298	GO:0009908//flower development;GO:0051788//response to misfolded protein;GO:0043161//proteasomal ubiquitin-dependent protein catabolic process;GO:0048825//cotyledon development;GO:0031540//regulation of anthocyanin biosynthetic process;GO:0009647//skotomorphogenesis;GO:0009408//response to heat;GO:0048366//leaf development;GO:0048528//post-embryonic root development;GO:0009735//response to cytoki…	-	GO:0009941//chloroplast envelope;GO:0005838//proteasome regulatory particle
CL14979.Contig2_All	1227	GO:0009908//flower development;GO:0051788//response to misfolded protein;GO:0043161//proteasomal ubiquitin-dependent protein catabolic process;GO:0048825//cotyledon development;GO:0031540//regulation of anthocyanin biosynthetic process;GO:0009647//skotomorphogenesis;GO:0009408//response to heat;GO:0048366//leaf development;GO:0048528//post-embryonic root development;GO:0009735//response to cytoki…	-	GO:0009941//chloroplast envelope;GO:0005838//proteasome regulatory particle
CL15067.Contig1_All	3068	GO:2000069//regulation of post-embryonic root development;GO:0016036//cellular response to phosphate starvation;GO:0017145//stem cell division;GO:0043161//proteasomal ubiquitin-dependent protein catabolic process;GO:0010364//regulation of ethylene biosynthetic process;GO:0009755//hormone-mediated signaling pathway;GO:0048825//cotyledon development;GO:0010182//sugar mediated signaling pathway;GO:0…	GO:0030674//protein binding, bridging	GO:0005634//nucleus
CL15067.Contig2_All	3834	GO:2000069//regulation of post-embryonic root development;GO:0016036//cellular response to phosphate starvation;GO:0017145//stem cell division;GO:0043161//proteasomal ubiquitin-dependent protein catabolic process;GO:0010364//regulation of ethylene biosynthetic process;GO:0009755//hormone-mediated signaling pathway;GO:0048825//cotyledon development;GO:0010182//sugar mediated signaling pathway;GO:0…	GO:0030674//protein binding, bridging	GO:0005634//nucleus
CL15067.Contig3_All	3684	GO:2000069//regulation of post-embryonic root development;GO:0016036//cellular response to phosphate starvation;GO:0017145//stem cell division;GO:0043161//proteasomal ubiquitin-dependent protein catabolic process;GO:0010364//regulation of ethylene biosynthetic process;GO:0009755//hormone-mediated signaling pathway;GO:0048825//cotyledon development;GO:0010182//sugar mediated signaling pathway;GO:0…	GO:0030674//protein binding, bridging	GO:0005634//nucleus
CL15067.Contig4_All	1987	GO:2000069//regulation of post-embryonic root development;GO:0016036//cellular response to phosphate starvation;GO:0017145//stem cell division;GO:0043161//proteasomal ubiquitin-dependent protein catabolic process;GO:0010364//regulation of ethylene biosynthetic process;GO:0009755//hormone-mediated signaling pathway;GO:0048825//cotyledon development;GO:0010182//sugar mediated signaling pathway;GO:0…	GO:0030674//protein binding, bridging	GO:0005634//nucleus
CL15067.Contig5_All	3538	GO:2000069//regulation of post-embryonic root development;GO:0016036//cellular response to phosphate starvation;GO:0017145//stem cell division;GO:0043161//proteasomal ubiquitin-dependent protein catabolic process;GO:0010364//regulation of ethylene biosynthetic process;GO:0009755//hormone-mediated signaling pathway;GO:0048825//cotyledon development;GO:0010182//sugar mediated signaling pathway;GO:0…	GO:0030674//protein binding, bridging	GO:0005634//nucleus
CL15347.Contig1_All	523	GO:0032504//multicellular organism reproduction;GO:0019288//isopentenyl diphosphate biosynthetic process, mevalonate-independent pathway;GO:0006816//calcium ion transport;GO:0009651//response to salt stress;GO:0006546//glycine catabolic process;GO:0007030//Golgi organization;GO:0032880//regulation of protein localization;GO:0080022//primary root development;GO:0019563//glycerol catabolic process;…	GO:0004807//triose-phosphate isomerase activity	GO:0009941//chloroplast envelope;GO:0048046//apoplast;GO:0005829//cytosol;GO:0009570//chloroplast stroma;GO:0009579//thylakoid;GO:0005739//mitochondrion
CL15347.Contig2_All	1578	GO:0032504//multicellular organism reproduction;GO:0019288//isopentenyl diphosphate biosynthetic process, mevalonate-independent pathway;GO:0006816//calcium ion transport;GO:0009651//response to salt stress;GO:0006546//glycine catabolic process;GO:0007030//Golgi organization;GO:0006096//glycolysis;GO:0032880//regulation of protein localization;GO:0080022//primary root development;GO:0019563//glyc…	GO:0004807//triose-phosphate isomerase activity	GO:0009941//chloroplast envelope;GO:0048046//apoplast;GO:0005829//cytosol;GO:0009570//chloroplast stroma;GO:0009579//thylakoid;GO:0005739//mitochondrion
CL1552.Contig10_All	4255	GO:0071366//cellular response to indolebutyric acid stimulus;GO:0048364//root development;GO:0009926//auxin polar transport;GO:0006200//ATP catabolic process	GO:0015416//organic phosphonate transmembrane-transporting ATPase activity;GO:0005524//ATP binding	GO:0005886//plasma membrane
CL1552.Contig11_All	4440	GO:0071366//cellular response to indolebutyric acid stimulus;GO:0048364//root development;GO:0009926//auxin polar transport;GO:0006200//ATP catabolic process	GO:0015416//organic phosphonate transmembrane-transporting ATPase activity;GO:0005524//ATP binding	GO:0005886//plasma membrane
CL1552.Contig12_All	3537	GO:0048364//root development;GO:0009926//auxin polar transport;GO:0006200//ATP catabolic process;GO:0071366//cellular response to indolebutyric acid stimulus	GO:0005524//ATP binding;GO:0016887//ATPase activity;GO:0005215//transporter activity	GO:0005886//plasma membrane
CL1552.Contig13_All	4041	GO:0071366//cellular response to indolebutyric acid stimulus;GO:0048364//root development;GO:0009926//auxin polar transport;GO:0006200//ATP catabolic process	GO:0015416//organic phosphonate transmembrane-transporting ATPase activity;GO:0005524//ATP binding	GO:0005886//plasma membrane
CL1552.Contig14_All	4836	GO:0071366//cellular response to indolebutyric acid stimulus;GO:0048364//root development;GO:0009926//auxin polar transport;GO:0006200//ATP catabolic process	GO:0015416//organic phosphonate transmembrane-transporting ATPase activity;GO:0005524//ATP binding	GO:0005886//plasma membrane
CL1552.Contig15_All	4408	GO:0071366//cellular response to indolebutyric acid stimulus;GO:0048364//root development;GO:0009926//auxin polar transport;GO:0006200//ATP catabolic process	GO:0015416//organic phosphonate transmembrane-transporting ATPase activity;GO:0005524//ATP binding	GO:0005886//plasma membrane
CL1552.Contig16_All	4131	GO:0048364//root development;GO:0009926//auxin polar transport;GO:0006200//ATP catabolic process;GO:0071366//cellular response to indolebutyric acid stimulus	GO:0005524//ATP binding;GO:0016887//ATPase activity;GO:0005215//transporter activity	GO:0005886//plasma membrane
CL1552.Contig17_All	4039	GO:0071366//cellular response to indolebutyric acid stimulus;GO:0048364//root development;GO:0009926//auxin polar transport;GO:0006200//ATP catabolic process	GO:0015416//organic phosphonate transmembrane-transporting ATPase activity;GO:0005524//ATP binding	GO:0005886//plasma membrane
CL1552.Contig18_All	4085	GO:0071366//cellular response to indolebutyric acid stimulus;GO:0048364//root development;GO:0009926//auxin polar transport;GO:0006200//ATP catabolic process	GO:0015416//organic phosphonate transmembrane-transporting ATPase activity;GO:0005524//ATP binding	GO:0005886//plasma membrane
CL1552.Contig19_All	4591	GO:0071366//cellular response to indolebutyric acid stimulus;GO:0048364//root development;GO:0006855//drug transmembrane transport;GO:0010359//regulation of anion channel activity;GO:0009926//auxin polar transport;GO:0000041//transition metal ion transport;GO:0006200//ATP catabolic process	GO:0015416//organic phosphonate transmembrane-transporting ATPase activity;GO:0005524//ATP binding	GO:0009506//plasmodesma;GO:0005886//plasma membrane
CL1552.Contig1_All	4042	GO:0071366//cellular response to indolebutyric acid stimulus;GO:0048364//root development;GO:0009926//auxin polar transport;GO:0006200//ATP catabolic process	GO:0015416//organic phosphonate transmembrane-transporting ATPase activity;GO:0005524//ATP binding	GO:0005886//plasma membrane
CL1552.Contig20_All	3977	GO:0071366//cellular response to indolebutyric acid stimulus;GO:0048364//root development;GO:0009926//auxin polar transport;GO:0006200//ATP catabolic process	GO:0015416//organic phosphonate transmembrane-transporting ATPase activity;GO:0005524//ATP binding	GO:0005886//plasma membrane
CL1552.Contig21_All	4938	GO:0071366//cellular response to indolebutyric acid stimulus;GO:0048364//root development;GO:0006855//drug transmembrane transport;GO:0010359//regulation of anion channel activity;GO:0009926//auxin polar transport;GO:0000041//transition metal ion transport;GO:0006200//ATP catabolic process	GO:0015416//organic phosphonate transmembrane-transporting ATPase activity;GO:0005524//ATP binding	GO:0009506//plasmodesma;GO:0005886//plasma membrane
CL1552.Contig22_All	3954	GO:0071366//cellular response to indolebutyric acid stimulus;GO:0048364//root development;GO:0009926//auxin polar transport;GO:0006200//ATP catabolic process	GO:0015416//organic phosphonate transmembrane-transporting ATPase activity;GO:0005524//ATP binding	GO:0005886//plasma membrane
CL1552.Contig23_All	4548	GO:0071366//cellular response to indolebutyric acid stimulus;GO:0048364//root development;GO:0009926//auxin polar transport;GO:0006200//ATP catabolic process	GO:0015416//organic phosphonate transmembrane-transporting ATPase activity;GO:0005524//ATP binding	GO:0005886//plasma membrane
CL1552.Contig24_All	4475	GO:0048364//root development;GO:0009926//auxin polar transport;GO:0006200//ATP catabolic process;GO:0071366//cellular response to indolebutyric acid stimulus	GO:0005524//ATP binding;GO:0016887//ATPase activity;GO:0005215//transporter activity	GO:0005886//plasma membrane
CL1552.Contig25_All	4539	GO:0048364//root development;GO:0009926//auxin polar transport;GO:0006200//ATP catabolic process;GO:0071366//cellular response to indolebutyric acid stimulus	GO:0005524//ATP binding;GO:0016887//ATPase activity;GO:0005215//transporter activity	GO:0005886//plasma membrane
CL1552.Contig26_All	3731	GO:0071366//cellular response to indolebutyric acid stimulus;GO:0048364//root development;GO:0009926//auxin polar transport;GO:0006200//ATP catabolic process	GO:0015416//organic phosphonate transmembrane-transporting ATPase activity;GO:0005524//ATP binding	GO:0005886//plasma membrane
CL1552.Contig28_All	3926	GO:0071366//cellular response to indolebutyric acid stimulus;GO:0048364//root development;GO:0009926//auxin polar transport;GO:0006200//ATP catabolic process	GO:0015416//organic phosphonate transmembrane-transporting ATPase activity;GO:0005524//ATP binding	GO:0005886//plasma membrane
CL1552.Contig29_All	4787	GO:0071366//cellular response to indolebutyric acid stimulus;GO:0048364//root development;GO:0009926//auxin polar transport;GO:0006200//ATP catabolic process	GO:0015416//organic phosphonate transmembrane-transporting ATPase activity;GO:0005524//ATP binding	GO:0005886//plasma membrane
CL1552.Contig2_All	4820	GO:0071366//cellular response to indolebutyric acid stimulus;GO:0048364//root development;GO:0009926//auxin polar transport;GO:0006200//ATP catabolic process	GO:0015416//organic phosphonate transmembrane-transporting ATPase activity;GO:0005524//ATP binding	GO:0005886//plasma membrane
CL1552.Contig31_All	4609	GO:0071366//cellular response to indolebutyric acid stimulus;GO:0048364//root development;GO:0009926//auxin polar transport;GO:0006200//ATP catabolic process	GO:0015416//organic phosphonate transmembrane-transporting ATPase activity;GO:0005524//ATP binding	GO:0005886//plasma membrane
CL1552.Contig32_All	4332	GO:0071366//cellular response to indolebutyric acid stimulus;GO:0048364//root development;GO:0006855//drug transmembrane transport;GO:0010359//regulation of anion channel activity;GO:0009926//auxin polar transport;GO:0000041//transition metal ion transport;GO:0006200//ATP catabolic process	GO:0015416//organic phosphonate transmembrane-transporting ATPase activity;GO:0005524//ATP binding	GO:0009506//plasmodesma;GO:0005886//plasma membrane
CL1552.Contig33_All	4655	GO:0071366//cellular response to indolebutyric acid stimulus;GO:0048364//root development;GO:0009926//auxin polar transport;GO:0006200//ATP catabolic process	GO:0015416//organic phosphonate transmembrane-transporting ATPase activity;GO:0005524//ATP binding	GO:0005886//plasma membrane
CL1552.Contig34_All	1176	GO:0071366//cellular response to indolebutyric acid stimulus;GO:0048364//root development;GO:0009926//auxin polar transport;GO:0006200//ATP catabolic process	GO:0015416//organic phosphonate transmembrane-transporting ATPase activity;GO:0005524//ATP binding	GO:0005886//plasma membrane
CL1552.Contig35_All	4719	GO:0071366//cellular response to indolebutyric acid stimulus;GO:0048364//root development;GO:0009926//auxin polar transport;GO:0006200//ATP catabolic process	GO:0015416//organic phosphonate transmembrane-transporting ATPase activity;GO:0005524//ATP binding	GO:0005886//plasma membrane
CL1552.Contig36_All	4375	GO:0071366//cellular response to indolebutyric acid stimulus;GO:0048364//root development;GO:0009926//auxin polar transport;GO:0006200//ATP catabolic process	GO:0015416//organic phosphonate transmembrane-transporting ATPase activity;GO:0005524//ATP binding	GO:0005886//plasma membrane
CL1552.Contig37_All	4085	GO:0071366//cellular response to indolebutyric acid stimulus;GO:0048364//root development;GO:0009926//auxin polar transport;GO:0006200//ATP catabolic process	GO:0015416//organic phosphonate transmembrane-transporting ATPase activity;GO:0005524//ATP binding	GO:0005886//plasma membrane
CL1552.Contig38_All	4393	GO:0071366//cellular response to indolebutyric acid stimulus;GO:0048364//root development;GO:0009926//auxin polar transport;GO:0006200//ATP catabolic process	GO:0015416//organic phosphonate transmembrane-transporting ATPase activity;GO:0005524//ATP binding	GO:0005886//plasma membrane
CL1552.Contig39_All	4538	GO:0071366//cellular response to indolebutyric acid stimulus;GO:0048364//root development;GO:0009926//auxin polar transport;GO:0006200//ATP catabolic process	GO:0015416//organic phosphonate transmembrane-transporting ATPase activity;GO:0005524//ATP binding	GO:0005886//plasma membrane
CL1552.Contig3_All	3978	GO:0071366//cellular response to indolebutyric acid stimulus;GO:0048364//root development;GO:0009926//auxin polar transport;GO:0006200//ATP catabolic process	GO:0015416//organic phosphonate transmembrane-transporting ATPase activity;GO:0005524//ATP binding	GO:0005886//plasma membrane
CL1552.Contig40_All	4556	GO:0071366//cellular response to indolebutyric acid stimulus;GO:0048364//root development;GO:0009926//auxin polar transport;GO:0006200//ATP catabolic process	GO:0015416//organic phosphonate transmembrane-transporting ATPase activity;GO:0005524//ATP binding	GO:0005886//plasma membrane
CL1552.Contig41_All	4620	GO:0071366//cellular response to indolebutyric acid stimulus;GO:0048364//root development;GO:0009926//auxin polar transport;GO:0006200//ATP catabolic process	GO:0015416//organic phosphonate transmembrane-transporting ATPase activity;GO:0005524//ATP binding	GO:0005886//plasma membrane
CL1552.Contig42_All	4673	GO:0071366//cellular response to indolebutyric acid stimulus;GO:0048364//root development;GO:0009926//auxin polar transport;GO:0006200//ATP catabolic process	GO:0015416//organic phosphonate transmembrane-transporting ATPase activity;GO:0005524//ATP binding	GO:0005886//plasma membrane
CL1552.Contig43_All	4602	GO:0071366//cellular response to indolebutyric acid stimulus;GO:0048364//root development;GO:0009926//auxin polar transport;GO:0006200//ATP catabolic process	GO:0015416//organic phosphonate transmembrane-transporting ATPase activity;GO:0005524//ATP binding	GO:0005886//plasma membrane
CL1552.Contig44_All	4609	GO:0071366//cellular response to indolebutyric acid stimulus;GO:0048364//root development;GO:0009926//auxin polar transport;GO:0006200//ATP catabolic process	GO:0015416//organic phosphonate transmembrane-transporting ATPase activity;GO:0005524//ATP binding	GO:0005886//plasma membrane
CL1552.Contig45_All	3679	GO:0048364//root development;GO:0009926//auxin polar transport;GO:0006200//ATP catabolic process;GO:0071366//cellular response to indolebutyric acid stimulus	GO:0005524//ATP binding;GO:0016887//ATPase activity;GO:0005215//transporter activity	GO:0005886//plasma membrane
CL1552.Contig46_All	3633	GO:0048364//root development;GO:0009926//auxin polar transport;GO:0006200//ATP catabolic process;GO:0071366//cellular response to indolebutyric acid stimulus	GO:0005524//ATP binding;GO:0016887//ATPase activity;GO:0005215//transporter activity	GO:0005886//plasma membrane
CL1552.Contig47_All	4621	GO:0071366//cellular response to indolebutyric acid stimulus;GO:0048364//root development;GO:0009926//auxin polar transport;GO:0006200//ATP catabolic process	GO:0015416//organic phosphonate transmembrane-transporting ATPase activity;GO:0005524//ATP binding	GO:0005886//plasma membrane
CL1552.Contig48_All	4443	GO:0071366//cellular response to indolebutyric acid stimulus;GO:0048364//root development;GO:0009926//auxin polar transport;GO:0006200//ATP catabolic process	GO:0015416//organic phosphonate transmembrane-transporting ATPase activity;GO:0005524//ATP binding	GO:0005886//plasma membrane
CL1552.Contig49_All	3131	GO:0048364//root development;GO:0009926//auxin polar transport;GO:0006200//ATP catabolic process;GO:0071366//cellular response to indolebutyric acid stimulus	GO:0005524//ATP binding;GO:0016887//ATPase activity;GO:0005215//transporter activity	GO:0005886//plasma membrane
CL1552.Contig4_All	4756	GO:0071366//cellular response to indolebutyric acid stimulus;GO:0048364//root development;GO:0006855//drug transmembrane transport;GO:0010359//regulation of anion channel activity;GO:0009926//auxin polar transport;GO:0000041//transition metal ion transport;GO:0006200//ATP catabolic process	GO:0015416//organic phosphonate transmembrane-transporting ATPase activity;GO:0005524//ATP binding	GO:0009506//plasmodesma;GO:0005886//plasma membrane
CL1552.Contig50_All	3352	GO:0048364//root development;GO:0009926//auxin polar transport;GO:0006200//ATP catabolic process;GO:0071366//cellular response to indolebutyric acid stimulus	GO:0005524//ATP binding;GO:0016887//ATPase activity;GO:0005215//transporter activity	GO:0005886//plasma membrane
CL1552.Contig51_All	4397	GO:0071366//cellular response to indolebutyric acid stimulus;GO:0048364//root development;GO:0009926//auxin polar transport;GO:0006200//ATP catabolic process	GO:0015416//organic phosphonate transmembrane-transporting ATPase activity;GO:0005524//ATP binding	GO:0005886//plasma membrane
CL1552.Contig52_All	4379	GO:0071366//cellular response to indolebutyric acid stimulus;GO:0048364//root development;GO:0009926//auxin polar transport;GO:0006200//ATP catabolic process	GO:0015416//organic phosphonate transmembrane-transporting ATPase activity;GO:0005524//ATP binding	GO:0005886//plasma membrane
CL1552.Contig53_All	4731	GO:0071366//cellular response to indolebutyric acid stimulus;GO:0048364//root development;GO:0009926//auxin polar transport;GO:0006200//ATP catabolic process	GO:0015416//organic phosphonate transmembrane-transporting ATPase activity;GO:0005524//ATP binding	GO:0005886//plasma membrane
CL1552.Contig54_All	4667	GO:0071366//cellular response to indolebutyric acid stimulus;GO:0048364//root development;GO:0009926//auxin polar transport;GO:0006200//ATP catabolic process	GO:0015416//organic phosphonate transmembrane-transporting ATPase activity;GO:0005524//ATP binding	GO:0005886//plasma membrane
CL1552.Contig55_All	3195	GO:0071366//cellular response to indolebutyric acid stimulus;GO:0048364//root development;GO:0006855//drug transmembrane transport;GO:0009926//auxin polar transport;GO:0006200//ATP catabolic process	GO:0005215//transporter activity;GO:0016887//ATPase activity;GO:0005524//ATP binding	GO:0005886//plasma membrane;GO:0005634//nucleus
CL1552.Contig56_All	4548	GO:0071366//cellular response to indolebutyric acid stimulus;GO:0048364//root development;GO:0009926//auxin polar transport;GO:0006200//ATP catabolic process	GO:0015416//organic phosphonate transmembrane-transporting ATPase activity;GO:0005524//ATP binding	GO:0005886//plasma membrane
CL1552.Contig57_All	4436	GO:0071366//cellular response to indolebutyric acid stimulus;GO:0048364//root development;GO:0009926//auxin polar transport;GO:0006200//ATP catabolic process	GO:0015416//organic phosphonate transmembrane-transporting ATPase activity;GO:0005524//ATP binding	GO:0005886//plasma membrane
CL1552.Contig58_All	4363	GO:0071366//cellular response to indolebutyric acid stimulus;GO:0048364//root development;GO:0009926//auxin polar transport;GO:0006200//ATP catabolic process	GO:0015416//organic phosphonate transmembrane-transporting ATPase activity;GO:0005524//ATP binding	GO:0005886//plasma membrane
CL1552.Contig59_All	4333	GO:0071366//cellular response to indolebutyric acid stimulus;GO:0048364//root development;GO:0009926//auxin polar transport;GO:0006200//ATP catabolic process	GO:0015416//organic phosphonate transmembrane-transporting ATPase activity;GO:0005524//ATP binding	GO:0005886//plasma membrane
CL1552.Contig5_All	4689	GO:0071366//cellular response to indolebutyric acid stimulus;GO:0048364//root development;GO:0009926//auxin polar transport;GO:0006200//ATP catabolic process	GO:0015416//organic phosphonate transmembrane-transporting ATPase activity;GO:0005524//ATP binding	GO:0005886//plasma membrane
CL1552.Contig6_All	4753	GO:0071366//cellular response to indolebutyric acid stimulus;GO:0048364//root development;GO:0009926//auxin polar transport;GO:0006200//ATP catabolic process	GO:0015416//organic phosphonate transmembrane-transporting ATPase activity;GO:0005524//ATP binding	GO:0005886//plasma membrane
CL1552.Contig7_All	4021	GO:0071366//cellular response to indolebutyric acid stimulus;GO:0048364//root development;GO:0009926//auxin polar transport;GO:0006200//ATP catabolic process	GO:0015416//organic phosphonate transmembrane-transporting ATPase activity;GO:0005524//ATP binding	GO:0005886//plasma membrane
CL1552.Contig8_All	4281	GO:0071366//cellular response to indolebutyric acid stimulus;GO:0048364//root development;GO:0009926//auxin polar transport;GO:0006200//ATP catabolic process	GO:0015416//organic phosphonate transmembrane-transporting ATPase activity;GO:0005524//ATP binding	GO:0005886//plasma membrane
CL1552.Contig9_All	4439	GO:0071366//cellular response to indolebutyric acid stimulus;GO:0048364//root development;GO:0009926//auxin polar transport;GO:0006200//ATP catabolic process	GO:0015416//organic phosphonate transmembrane-transporting ATPase activity;GO:0005524//ATP binding	GO:0005886//plasma membrane
CL15650.Contig1_All	4363	GO:0080022//primary root development;GO:0010103//stomatal complex morphogenesis;GO:0016567//protein ubiquitination;GO:0071249//cellular response to nitrate;GO:0048443//stamen development;GO:0002237//response to molecule of bacterial origin;GO:0010152//pollen maturation;GO:0048527//lateral root development;GO:0009734//auxin mediated signaling pathway	GO:0000822//inositol hexakisphosphate binding;GO:0010011//auxin binding;GO:0004842//ubiquitin-protein ligase activity	GO:0019005//SCF ubiquitin ligase complex;GO:0005774//vacuolar membrane;GO:0005634//nucleus;GO:0005886//plasma membrane
CL15650.Contig2_All	4025	GO:0080022//primary root development;GO:0010103//stomatal complex morphogenesis;GO:0016567//protein ubiquitination;GO:0071249//cellular response to nitrate;GO:0048443//stamen development;GO:0002237//response to molecule of bacterial origin;GO:0010152//pollen maturation;GO:0048527//lateral root development;GO:0009734//auxin mediated signaling pathway	GO:0000822//inositol hexakisphosphate binding;GO:0010011//auxin binding;GO:0004842//ubiquitin-protein ligase activity	GO:0019005//SCF ubiquitin ligase complex;GO:0005774//vacuolar membrane;GO:0005634//nucleus;GO:0005886//plasma membrane
CL15650.Contig3_All	1784	GO:0010103//stomatal complex morphogenesis;GO:0000394//RNA splicing, via endonucleolytic cleavage and ligation;GO:0009734//auxin mediated signaling pathway;GO:0048573//photoperiodism, flowering;GO:0009086//methionine biosynthetic process;GO:0010152//pollen maturation;GO:0071249//cellular response to nitrate;GO:0048527//lateral root development;GO:0080022//primary root development;GO:0002237//resp…	GO:0004842//ubiquitin-protein ligase activity;GO:0000822//inositol hexakisphosphate binding;GO:0010011//auxin binding	GO:0005774//vacuolar membrane;GO:0005886//plasma membrane;GO:0005634//nucleus
CL15650.Contig4_All	1240	GO:0080022//primary root development;GO:0010103//stomatal complex morphogenesis;GO:0016567//protein ubiquitination;GO:0071249//cellular response to nitrate;GO:0048443//stamen development;GO:0002237//response to molecule of bacterial origin;GO:0010152//pollen maturation;GO:0048527//lateral root development;GO:0009734//auxin mediated signaling pathway	GO:0000822//inositol hexakisphosphate binding;GO:0010011//auxin binding;GO:0004842//ubiquitin-protein ligase activity	GO:0019005//SCF ubiquitin ligase complex;GO:0005774//vacuolar membrane;GO:0005634//nucleus;GO:0005886//plasma membrane
CL1567.Contig2_All	528	GO:0048364//root development;GO:0030154//cell differentiation;GO:0009653//anatomical structure morphogenesis;GO:0016043//cellular component organization	GO:0005515//protein binding	GO:0044424//intracellular part
CL15805.Contig1_All	977	GO:0009987//cellular process;GO:0009416//response to light stimulus;GO:0080086//stamen filament development;GO:0009741//response to brassinosteroid stimulus;GO:0009606//tropism;GO:0009733//response to auxin stimulus;GO:0048527//lateral root development	GO:0005515//protein binding	-
CL15822.Contig1_All	2538	GO:0043085//positive regulation of catalytic activity;GO:0019252//starch biosynthetic process;GO:0000023//maltose metabolic process;GO:0009698//phenylpropanoid metabolic process;GO:0042425//choline biosynthetic process;GO:0010183//pollen tube guidance;GO:0006598//polyamine catabolic process;GO:0042398//cellular modified amino acid biosynthetic process;GO:0009555//pollen development;GO:0032259//me…	GO:0000234//phosphoethanolamine N-methyltransferase activity;GO:0052667//phosphomethylethanolamine N-methyltransferase activity	GO:0005737//cytoplasm
CL15822.Contig2_All	2532	GO:0043085//positive regulation of catalytic activity;GO:0019252//starch biosynthetic process;GO:0000023//maltose metabolic process;GO:0009698//phenylpropanoid metabolic process;GO:0042425//choline biosynthetic process;GO:0010183//pollen tube guidance;GO:0006598//polyamine catabolic process;GO:0042398//cellular modified amino acid biosynthetic process;GO:0009555//pollen development;GO:0032259//me…	GO:0000234//phosphoethanolamine N-methyltransferase activity;GO:0052667//phosphomethylethanolamine N-methyltransferase activity	GO:0005829//cytosol
CL15822.Contig3_All	2291	GO:0043085//positive regulation of catalytic activity;GO:0019252//starch biosynthetic process;GO:0000023//maltose metabolic process;GO:0009698//phenylpropanoid metabolic process;GO:0042425//choline biosynthetic process;GO:0010183//pollen tube guidance;GO:0006598//polyamine catabolic process;GO:0042398//cellular modified amino acid biosynthetic process;GO:0009555//pollen development;GO:0032259//me…	GO:0000234//phosphoethanolamine N-methyltransferase activity;GO:0052667//phosphomethylethanolamine N-methyltransferase activity	GO:0005829//cytosol
CL15822.Contig4_All	2271	GO:0043085//positive regulation of catalytic activity;GO:0019252//starch biosynthetic process;GO:0000023//maltose metabolic process;GO:0009698//phenylpropanoid metabolic process;GO:0042425//choline biosynthetic process;GO:0010183//pollen tube guidance;GO:0006598//polyamine catabolic process;GO:0042398//cellular modified amino acid biosynthetic process;GO:0009555//pollen development;GO:0032259//me…	GO:0000234//phosphoethanolamine N-methyltransferase activity;GO:0052667//phosphomethylethanolamine N-methyltransferase activity	GO:0005829//cytosol
CL16102.Contig3_All	1099	GO:0048364//root development;GO:0030154//cell differentiation;GO:0009653//anatomical structure morphogenesis;GO:0016043//cellular component organization	-	-
CL16344.Contig1_All	2084	GO:0006810//transport;GO:0006486//protein glycosylation;GO:0042546//cell wall biogenesis;GO:0000919//cell plate assembly;GO:0048528//post-embryonic root development;GO:0009790//embryo development	GO:0005089//Rho guanyl-nucleotide exchange factor activity;GO:0005515//protein binding	GO:0005829//cytosol;GO:0016020//membrane;GO:0005634//nucleus
CL16344.Contig2_All	2821	GO:0006486//protein glycosylation;GO:0042546//cell wall biogenesis;GO:0000919//cell plate assembly;GO:0048528//post-embryonic root development;GO:0009790//embryo development	GO:0005089//Rho guanyl-nucleotide exchange factor activity;GO:0005515//protein binding	GO:0005829//cytosol;GO:0016020//membrane;GO:0005634//nucleus
CL16356.Contig1_All	2159	GO:0010260//organ senescence;GO:0009594//detection of nutrient;GO:0003006//developmental process involved in reproduction;GO:0006007//glucose catabolic process;GO:0010050//vegetative phase change;GO:0010182//sugar mediated signaling pathway;GO:0006468//protein phosphorylation;GO:0006486//protein glycosylation;GO:0080022//primary root development;GO:0009738//abscisic acid mediated signaling pathway	GO:0005515//protein binding;GO:0004674//protein serine/threonine kinase activity;GO:0005524//ATP binding	GO:0000152//nuclear ubiquitin ligase complex
CL16356.Contig2_All	2106	GO:0010260//organ senescence;GO:0009594//detection of nutrient;GO:0003006//developmental process involved in reproduction;GO:0006007//glucose catabolic process;GO:0010050//vegetative phase change;GO:0010182//sugar mediated signaling pathway;GO:0006468//protein phosphorylation;GO:0006486//protein glycosylation;GO:0080022//primary root development;GO:0009738//abscisic acid mediated signaling pathway	GO:0005515//protein binding;GO:0004674//protein serine/threonine kinase activity;GO:0005524//ATP binding	GO:0000152//nuclear ubiquitin ligase complex
CL16356.Contig3_All	2031	GO:0010260//organ senescence;GO:0009594//detection of nutrient;GO:0003006//developmental process involved in reproduction;GO:0006007//glucose catabolic process;GO:0010050//vegetative phase change;GO:0010182//sugar mediated signaling pathway;GO:0006468//protein phosphorylation;GO:0006486//protein glycosylation;GO:0080022//primary root development;GO:0009738//abscisic acid mediated signaling pathway	GO:0005515//protein binding;GO:0004674//protein serine/threonine kinase activity;GO:0005524//ATP binding	GO:0000152//nuclear ubiquitin ligase complex
CL16356.Contig4_All	2291	GO:0010260//organ senescence;GO:0009594//detection of nutrient;GO:0003006//developmental process involved in reproduction;GO:0006007//glucose catabolic process;GO:0010050//vegetative phase change;GO:0010182//sugar mediated signaling pathway;GO:0006468//protein phosphorylation;GO:0006486//protein glycosylation;GO:0080022//primary root development;GO:0009738//abscisic acid mediated signaling pathway	GO:0005515//protein binding;GO:0004674//protein serine/threonine kinase activity;GO:0005524//ATP binding	GO:0000152//nuclear ubiquitin ligase complex
CL16361.Contig1_All	839	GO:0010540//basipetal auxin transport;GO:0009845//seed germination;GO:0010541//acropetal auxin transport;GO:0009817//defense response to fungus, incompatible interaction;GO:0048527//lateral root development;GO:0007186//G-protein coupled receptor signaling pathway	GO:0004871//signal transducer activity	GO:0005834//heterotrimeric G-protein complex
CL16361.Contig2_All	985	GO:0010540//basipetal auxin transport;GO:0009845//seed germination;GO:0010541//acropetal auxin transport;GO:0009817//defense response to fungus, incompatible interaction;GO:0048527//lateral root development;GO:0007186//G-protein coupled receptor signaling pathway	GO:0004871//signal transducer activity;GO:0005515//protein binding	GO:0005834//heterotrimeric G-protein complex
CL16361.Contig3_All	1069	GO:0010540//basipetal auxin transport;GO:0009845//seed germination;GO:0010541//acropetal auxin transport;GO:0009817//defense response to fungus, incompatible interaction;GO:0048527//lateral root development;GO:0007186//G-protein coupled receptor signaling pathway	GO:0004871//signal transducer activity;GO:0005515//protein binding	GO:0005834//heterotrimeric G-protein complex
CL16440.Contig1_All	2135	GO:0007205//protein kinase C-activating G-protein coupled receptor signaling pathway;GO:0016310//phosphorylation;GO:0048364//root development;GO:0048366//leaf development	GO:0004143//diacylglycerol kinase activity	GO:0005886//plasma membrane
CL16486.Contig1_All	1153	GO:0048364//root development;GO:0010090//trichome morphogenesis	-	GO:0015630//microtubule cytoskeleton
CL16486.Contig2_All	1238	GO:0048364//root development;GO:0010090//trichome morphogenesis	-	GO:0015630//microtubule cytoskeleton
CL16486.Contig3_All	1591	GO:0048364//root development;GO:0010090//trichome morphogenesis	-	GO:0005737//cytoplasm;GO:0015630//microtubule cytoskeleton
CL16486.Contig4_All	1650	GO:0048364//root development;GO:0010090//trichome morphogenesis	-	GO:0005737//cytoplasm;GO:0015630//microtubule cytoskeleton
CL1694.Contig1_All	1860	GO:0048364//root development;GO:0006355//regulation of transcription, DNA-dependent;GO:0009647//skotomorphogenesis;GO:0010262//somatic embryogenesis;GO:0009630//gravitropism;GO:0010588//cotyledon vascular tissue pattern formation;GO:0009734//auxin mediated signaling pathway	GO:0046983//protein dimerization activity	GO:0005739//mitochondrion;GO:0009536//plastid;GO:0005634//nucleus
CL1694.Contig5_All	463	GO:0048364//root development;GO:0006417//regulation of translation;GO:0006355//regulation of transcription, DNA-dependent;GO:0009647//skotomorphogenesis;GO:0010262//somatic embryogenesis;GO:0010583//response to cyclopentenone;GO:0009630//gravitropism;GO:0010588//cotyledon vascular tissue pattern formation;GO:0009734//auxin mediated signaling pathway	GO:0046983//protein dimerization activity;GO:0003700//sequence-specific DNA binding transcription factor activity	GO:0005739//mitochondrion;GO:0009536//plastid;GO:0005634//nucleus
CL1732.Contig1_All	3129	GO:0048364//root development;GO:0007186//G-protein coupled receptor signaling pathway;GO:0006184//GTP catabolic process;GO:0009628//response to abiotic stimulus;GO:0009606//tropism;GO:0009746;GO:0097305//response to alcohol;GO:0009725//response to hormone stimulus	GO:0004871//signal transducer activity;GO:0005525//GTP binding;GO:0031683//G-protein beta/gamma-subunit complex binding;GO:0003924//GTPase activity	-
CL17390.Contig2_All	4008	GO:0048364//root development;GO:0009611//response to wounding;GO:0046855//inositol phosphate dephosphorylation;GO:0009827//plant-type cell wall modification;GO:0010252//auxin homeostasis;GO:0010182//sugar mediated signaling pathway;GO:0009637//response to blue light;GO:0009737//response to abscisic acid stimulus;GO:0010087//phloem or xylem histogenesis;GO:0007584//response to nutrient;GO:0009860/…	GO:0052658//inositol-1,4,5-trisphosphate 5-phosphatase activity	GO:0005737//cytoplasm;GO:0005634//nucleus
CL17657.Contig1_All	1908	GO:0006499//N-terminal protein myristoylation;GO:0051788//response to misfolded protein;GO:0009853//photorespiration;GO:0080129//proteasome core complex assembly;GO:0006511//ubiquitin-dependent protein catabolic process;GO:0042425//choline biosynthetic process;GO:0010183//pollen tube guidance;GO:0009555//pollen development;GO:0032259//methylation;GO:0019722//calcium-mediated signaling;GO:0048528/…	GO:0000234//phosphoethanolamine N-methyltransferase activity;GO:0004379//glycylpeptide N-tetradecanoyltransferase activity	GO:0005840//ribosome;GO:0005829//cytosol
CL17657.Contig2_All	2351	GO:0006499//N-terminal protein myristoylation;GO:0051788//response to misfolded protein;GO:0009853//photorespiration;GO:0080129//proteasome core complex assembly;GO:0006511//ubiquitin-dependent protein catabolic process;GO:0042425//choline biosynthetic process;GO:0010183//pollen tube guidance;GO:0009555//pollen development;GO:0032259//methylation;GO:0019722//calcium-mediated signaling;GO:0048528/…	GO:0000234//phosphoethanolamine N-methyltransferase activity;GO:0004379//glycylpeptide N-tetradecanoyltransferase activity	GO:0005840//ribosome;GO:0005829//cytosol
CL1782.Contig10_All	3713	GO:0006413//translational initiation;GO:0009850//auxin metabolic process;GO:0048830//adventitious root development;GO:0009616//virus induced gene silencing;GO:0009965//leaf morphogenesis;GO:0009733//response to auxin stimulus;GO:0010218//response to far red light;GO:0009793//embryo development ending in seed dormancy;GO:0035195//gene silencing by miRNA;GO:0016246//RNA interference	GO:0003743//translation initiation factor activity;GO:0035198//miRNA binding;GO:0004521//endoribonuclease activity;GO:0035197//siRNA binding	GO:0005829//cytosol;GO:0005634//nucleus
CL1782.Contig11_All	2350	GO:0010267//production of ta-siRNAs involved in RNA interference;GO:0006346//methylation-dependent chromatin silencing;GO:0009965//leaf morphogenesis;GO:0048439//flower morphogenesis;GO:0010589//leaf proximal/distal pattern formation;GO:0048765//root hair cell differentiation;GO:0051301//cell division;GO:0006306//DNA methylation;GO:0009926//auxin polar transport;GO:0010072//primary shoot apical m…	GO:0004521//endoribonuclease activity;GO:0003743//translation initiation factor activity;GO:0035197//siRNA binding;GO:0005515//protein binding;GO:0035198//miRNA binding	GO:0019898//extrinsic to membrane;GO:0005829//cytosol;GO:0005634//nucleus
CL1782.Contig12_All	3161	GO:0010267//production of ta-siRNAs involved in RNA interference;GO:0006346//methylation-dependent chromatin silencing;GO:0009965//leaf morphogenesis;GO:0048439//flower morphogenesis;GO:0010589//leaf proximal/distal pattern formation;GO:0048765//root hair cell differentiation;GO:0051301//cell division;GO:0006306//DNA methylation;GO:0009926//auxin polar transport;GO:0010072//primary shoot apical m…	GO:0004521//endoribonuclease activity;GO:0035197//siRNA binding;GO:0005515//protein binding;GO:0035198//miRNA binding	GO:0019898//extrinsic to membrane;GO:0005829//cytosol;GO:0005634//nucleus
CL1782.Contig13_All	3292	GO:0010267//production of ta-siRNAs involved in RNA interference;GO:0006346//methylation-dependent chromatin silencing;GO:0009965//leaf morphogenesis;GO:0048439//flower morphogenesis;GO:0010589//leaf proximal/distal pattern formation;GO:0048765//root hair cell differentiation;GO:0051301//cell division;GO:0006306//DNA methylation;GO:0009926//auxin polar transport;GO:0010072//primary shoot apical m…	GO:0004521//endoribonuclease activity;GO:0035197//siRNA binding;GO:0005515//protein binding;GO:0035198//miRNA binding	GO:0019898//extrinsic to membrane;GO:0005829//cytosol;GO:0005634//nucleus
CL1782.Contig14_All	4279	GO:0006413//translational initiation;GO:0009850//auxin metabolic process;GO:0048830//adventitious root development;GO:0009616//virus induced gene silencing;GO:0009965//leaf morphogenesis;GO:0009733//response to auxin stimulus;GO:0010218//response to far red light;GO:0009793//embryo development ending in seed dormancy;GO:0035195//gene silencing by miRNA;GO:0016246//RNA interference	GO:0003743//translation initiation factor activity;GO:0035198//miRNA binding;GO:0004521//endoribonuclease activity;GO:0035197//siRNA binding	GO:0005829//cytosol;GO:0005634//nucleus
CL1782.Contig15_All	507	GO:0006413//translational initiation;GO:0009850//auxin metabolic process;GO:0048830//adventitious root development;GO:0009616//virus induced gene silencing;GO:0009965//leaf morphogenesis;GO:0009733//response to auxin stimulus;GO:0010218//response to far red light;GO:0009793//embryo development ending in seed dormancy;GO:0035195//gene silencing by miRNA;GO:0016246//RNA interference	GO:0003743//translation initiation factor activity;GO:0035198//miRNA binding;GO:0004521//endoribonuclease activity;GO:0035197//siRNA binding	GO:0005829//cytosol;GO:0005634//nucleus
CL1782.Contig16_All	888	GO:0006413//translational initiation;GO:0009850//auxin metabolic process;GO:0048830//adventitious root development;GO:0009616//virus induced gene silencing;GO:0009965//leaf morphogenesis;GO:0009733//response to auxin stimulus;GO:0010218//response to far red light;GO:0009793//embryo development ending in seed dormancy;GO:0035195//gene silencing by miRNA;GO:0016246//RNA interference	GO:0003743//translation initiation factor activity;GO:0035198//miRNA binding;GO:0004521//endoribonuclease activity;GO:0035197//siRNA binding	GO:0005829//cytosol;GO:0005634//nucleus
CL1782.Contig17_All	511	GO:0006413//translational initiation;GO:0009850//auxin metabolic process;GO:0048830//adventitious root development;GO:0009616//virus induced gene silencing;GO:0009965//leaf morphogenesis;GO:0009733//response to auxin stimulus;GO:0010218//response to far red light;GO:0009793//embryo development ending in seed dormancy;GO:0035195//gene silencing by miRNA;GO:0016246//RNA interference	GO:0003743//translation initiation factor activity;GO:0035198//miRNA binding;GO:0004521//endoribonuclease activity;GO:0035197//siRNA binding	GO:0005829//cytosol;GO:0005634//nucleus
CL1782.Contig1_All	2048	GO:0006413//translational initiation;GO:0009850//auxin metabolic process;GO:0048830//adventitious root development;GO:0009616//virus induced gene silencing;GO:0009965//leaf morphogenesis;GO:0009733//response to auxin stimulus;GO:0010218//response to far red light;GO:0009793//embryo development ending in seed dormancy;GO:0035195//gene silencing by miRNA;GO:0016246//RNA interference	GO:0003743//translation initiation factor activity;GO:0035198//miRNA binding;GO:0004521//endoribonuclease activity;GO:0035197//siRNA binding	GO:0005829//cytosol;GO:0005634//nucleus
CL1782.Contig2_All	1917	GO:0006413//translational initiation;GO:0009850//auxin metabolic process;GO:0048830//adventitious root development;GO:0009616//virus induced gene silencing;GO:0009965//leaf morphogenesis;GO:0009733//response to auxin stimulus;GO:0010218//response to far red light;GO:0009793//embryo development ending in seed dormancy;GO:0035195//gene silencing by miRNA;GO:0016246//RNA interference	GO:0003743//translation initiation factor activity;GO:0035198//miRNA binding;GO:0004521//endoribonuclease activity;GO:0035197//siRNA binding	GO:0005829//cytosol;GO:0005634//nucleus
CL1782.Contig3_All	1263	GO:0006413//translational initiation;GO:0009850//auxin metabolic process;GO:0048830//adventitious root development;GO:0009616//virus induced gene silencing;GO:0009965//leaf morphogenesis;GO:0009733//response to auxin stimulus;GO:0010218//response to far red light;GO:0009793//embryo development ending in seed dormancy;GO:0035195//gene silencing by miRNA;GO:0016246//RNA interference	GO:0003743//translation initiation factor activity;GO:0035198//miRNA binding;GO:0004521//endoribonuclease activity;GO:0035197//siRNA binding	GO:0005829//cytosol;GO:0005634//nucleus
CL1782.Contig8_All	3900	GO:0006413//translational initiation;GO:0009850//auxin metabolic process;GO:0048830//adventitious root development;GO:0009616//virus induced gene silencing;GO:0009965//leaf morphogenesis;GO:0009733//response to auxin stimulus;GO:0010218//response to far red light;GO:0009793//embryo development ending in seed dormancy;GO:0035195//gene silencing by miRNA;GO:0016246//RNA interference	GO:0003743//translation initiation factor activity;GO:0035198//miRNA binding;GO:0004521//endoribonuclease activity;GO:0035197//siRNA binding	GO:0005829//cytosol;GO:0005634//nucleus
CL1782.Contig9_All	4346	GO:0006413//translational initiation;GO:0009850//auxin metabolic process;GO:0048830//adventitious root development;GO:0009616//virus induced gene silencing;GO:0009965//leaf morphogenesis;GO:0009733//response to auxin stimulus;GO:0010218//response to far red light;GO:0009793//embryo development ending in seed dormancy;GO:0035195//gene silencing by miRNA;GO:0016246//RNA interference	GO:0003743//translation initiation factor activity;GO:0035198//miRNA binding;GO:0004521//endoribonuclease activity;GO:0035197//siRNA binding	GO:0005829//cytosol;GO:0005634//nucleus
CL17832.Contig1_All	379	GO:0009062//fatty acid catabolic process;GO:0080022//primary root development	GO:0008177//succinate dehydrogenase (ubiquinone) activity	GO:0005739//mitochondrion
CL17832.Contig2_All	749	GO:0009062//fatty acid catabolic process;GO:0080022//primary root development	GO:0008177//succinate dehydrogenase (ubiquinone) activity	GO:0005739//mitochondrion
CL17832.Contig3_All	762	GO:0009062//fatty acid catabolic process;GO:0080022//primary root development	GO:0008177//succinate dehydrogenase (ubiquinone) activity	GO:0005739//mitochondrion
CL17933.Contig1_All	958	GO:0009062//fatty acid catabolic process;GO:0080022//primary root development	GO:0008177//succinate dehydrogenase (ubiquinone) activity	GO:0005739//mitochondrion
CL17933.Contig2_All	1038	GO:0009062//fatty acid catabolic process;GO:0080022//primary root development	GO:0008177//succinate dehydrogenase (ubiquinone) activity	GO:0005739//mitochondrion
CL17972.Contig1_All	2644	GO:0006979//response to oxidative stress;GO:0055114//oxidation-reduction process;GO:0048364//root development;GO:0009269//response to desiccation;GO:0042538//hyperosmotic salinity response;GO:0009737//response to abscisic acid stimulus;GO:0055129//L-proline biosynthetic process;GO:0016310//phosphorylation;GO:0009793//embryo development ending in seed dormancy	GO:0005524//ATP binding;GO:0004350//glutamate-5-semialdehyde dehydrogenase activity;GO:0004349//glutamate 5-kinase activity	GO:0009507//chloroplast;GO:0016020//membrane
CL17972.Contig2_All	2671	GO:0006979//response to oxidative stress;GO:0055114//oxidation-reduction process;GO:0048364//root development;GO:0009269//response to desiccation;GO:0042538//hyperosmotic salinity response;GO:0009737//response to abscisic acid stimulus;GO:0055129//L-proline biosynthetic process;GO:0016310//phosphorylation;GO:0009793//embryo development ending in seed dormancy	GO:0005524//ATP binding;GO:0004350//glutamate-5-semialdehyde dehydrogenase activity;GO:0004349//glutamate 5-kinase activity	GO:0009507//chloroplast;GO:0016020//membrane
CL18016.Contig2_All	1292	GO:0048364//root development;GO:0030154//cell differentiation;GO:0009653//anatomical structure morphogenesis	-	-
CL18239.Contig1_All	1051	GO:0048364//root development;GO:0030154//cell differentiation;GO:0009653//anatomical structure morphogenesis	-	-
CL18560.Contig2_All	2486	GO:0055114//oxidation-reduction process;GO:0048364//root development;GO:0016575//histone deacetylation;GO:0051568//histone H3-K4 methylation;GO:0009791//post-embryonic development;GO:0048608//reproductive structure development	GO:0008131//primary amine oxidase activity;GO:0001716//L-amino-acid oxidase activity;GO:0003677//DNA binding;GO:0000166//nucleotide binding	GO:0005634//nucleus
CL18810.Contig1_All	3675	GO:0048527//lateral root development;GO:0009734//auxin mediated signaling pathway	GO:0000822//inositol hexakisphosphate binding	GO:0019005//SCF ubiquitin ligase complex;GO:0005634//nucleus
CL18810.Contig4_All	1606	GO:0048569//post-embryonic organ development;GO:0048364//root development;GO:0009791//post-embryonic development;GO:0009734//auxin mediated signaling pathway	GO:0000822//inositol hexakisphosphate binding	-
CL18810.Contig5_All	2092	GO:0048569//post-embryonic organ development;GO:0048364//root development;GO:0009791//post-embryonic development;GO:0009734//auxin mediated signaling pathway	GO:0000822//inositol hexakisphosphate binding	-
CL18810.Contig6_All	1864	GO:0048569//post-embryonic organ development;GO:0048364//root development;GO:0009791//post-embryonic development;GO:0009734//auxin mediated signaling pathway	GO:0000822//inositol hexakisphosphate binding	-
CL19158.Contig1_All	1615	GO:0048364//root development;GO:0008219//cell death;GO:0009651//response to salt stress;GO:0009743//response to carbohydrate stimulus;GO:0009733//response to auxin stimulus;GO:0009737//response to abscisic acid stimulus;GO:0000303//response to superoxide;GO:0009863//salicylic acid mediated signaling pathway;GO:0016973//poly(A)+ mRNA export from nucleus;GO:0009873//ethylene mediated signaling path…	GO:0005515//protein binding	GO:0000502//proteasome complex;GO:0005739//mitochondrion;GO:0005634//nucleus
CL19158.Contig2_All	1698	GO:0048364//root development;GO:0008219//cell death;GO:0009651//response to salt stress;GO:0009743//response to carbohydrate stimulus;GO:0009733//response to auxin stimulus;GO:0009737//response to abscisic acid stimulus;GO:0000303//response to superoxide;GO:0009863//salicylic acid mediated signaling pathway;GO:0016973//poly(A)+ mRNA export from nucleus;GO:0009873//ethylene mediated signaling path…	GO:0005515//protein binding	GO:0000502//proteasome complex;GO:0005739//mitochondrion;GO:0005634//nucleus
CL19158.Contig3_All	1321	GO:0048364//root development;GO:0008219//cell death;GO:0009651//response to salt stress;GO:0009743//response to carbohydrate stimulus;GO:0009733//response to auxin stimulus;GO:0009737//response to abscisic acid stimulus;GO:0000303//response to superoxide;GO:0009863//salicylic acid mediated signaling pathway;GO:0016973//poly(A)+ mRNA export from nucleus;GO:0009873//ethylene mediated signaling path…	GO:0005515//protein binding	GO:0000502//proteasome complex;GO:0005739//mitochondrion;GO:0005634//nucleus
CL19576.Contig2_All	1103	GO:0009651//response to salt stress;GO:0060416//response to growth hormone stimulus;GO:0006749//glutathione metabolic process;GO:0015824//proline transport;GO:0080148//negative regulation of response to water deprivation;GO:0048527//lateral root development;GO:0046686//response to cadmium ion;GO:0009407//toxin catabolic process;GO:0080167//response to karrikin;GO:0009704//de-etiolation	GO:0004364//glutathione transferase activity;GO:0004462//lactoylglutathione lyase activity	GO:0009507//chloroplast
CL19640.Contig1_All	808	GO:0009653//anatomical structure morphogenesis;GO:0009908//flower development;GO:0006351//transcription, DNA-dependent;GO:0048364//root development;GO:0009639//response to red or far red light;GO:0016570//histone modification;GO:0070647//protein modification by small protein conjugation or removal;GO:0048507//meristem development;GO:0050794//regulation of cellular process;GO:0009725//response to …	GO:0005515//protein binding;GO:0004402//histone acetyltransferase activity;GO:0003677//DNA binding	GO:0005634//nucleus
CL2157.Contig2_All	1960	GO:0043622//cortical microtubule organization;GO:0009664//plant-type cell wall organization;GO:0008283//cell proliferation;GO:0007020//microtubule nucleation;GO:0005982//starch metabolic process;GO:0030244//cellulose biosynthetic process;GO:0048193//Golgi vesicle transport;GO:0051322//anaphase;GO:0051302//regulation of cell division;GO:0001578//microtubule bundle formation;GO:0019344//cysteine bi…	GO:0046983//protein dimerization activity;GO:0008017//microtubule binding	GO:0072686//mitotic spindle;GO:0009524//phragmoplast;GO:0005829//cytosol;GO:0009574//preprophase band;GO:0005634//nucleus;GO:0010005//cortical microtubule, transverse to long axis
CL2157.Contig5_All	2203	GO:0043622//cortical microtubule organization;GO:0009664//plant-type cell wall organization;GO:0008283//cell proliferation;GO:0007020//microtubule nucleation;GO:0005982//starch metabolic process;GO:0030244//cellulose biosynthetic process;GO:0048193//Golgi vesicle transport;GO:0051322//anaphase;GO:0051302//regulation of cell division;GO:0001578//microtubule bundle formation;GO:0019344//cysteine bi…	GO:0046983//protein dimerization activity;GO:0008017//microtubule binding	GO:0072686//mitotic spindle;GO:0009524//phragmoplast;GO:0005829//cytosol;GO:0009574//preprophase band;GO:0005634//nucleus;GO:0010005//cortical microtubule, transverse to long axis
CL2157.Contig6_All	2489	GO:0043622//cortical microtubule organization;GO:0009664//plant-type cell wall organization;GO:0008283//cell proliferation;GO:0007020//microtubule nucleation;GO:0005982//starch metabolic process;GO:0030244//cellulose biosynthetic process;GO:0048193//Golgi vesicle transport;GO:0051322//anaphase;GO:0051302//regulation of cell division;GO:0001578//microtubule bundle formation;GO:0019344//cysteine bi…	GO:0046983//protein dimerization activity;GO:0008017//microtubule binding	GO:0072686//mitotic spindle;GO:0009524//phragmoplast;GO:0005829//cytosol;GO:0009574//preprophase band;GO:0005634//nucleus;GO:0010005//cortical microtubule, transverse to long axis
CL2197.Contig10_All	2392	GO:0005975//carbohydrate metabolic process;GO:0048364//root development;GO:0006520//cellular amino acid metabolic process	GO:0004575//sucrose alpha-glucosidase activity;GO:0033926	GO:0005886//plasma membrane;GO:0005634//nucleus;GO:0005829//cytosol
CL2197.Contig11_All	2965	GO:0005975//carbohydrate metabolic process;GO:0048364//root development;GO:0006520//cellular amino acid metabolic process	GO:0004575//sucrose alpha-glucosidase activity;GO:0033926	GO:0005886//plasma membrane;GO:0005634//nucleus;GO:0005829//cytosol
CL2197.Contig12_All	2298	GO:0005975//carbohydrate metabolic process;GO:0048364//root development;GO:0006520//cellular amino acid metabolic process	GO:0004575//sucrose alpha-glucosidase activity;GO:0033926	GO:0005886//plasma membrane;GO:0005634//nucleus;GO:0005829//cytosol
CL2197.Contig13_All	2186	GO:0005975//carbohydrate metabolic process;GO:0048364//root development;GO:0006520//cellular amino acid metabolic process	GO:0004575//sucrose alpha-glucosidase activity;GO:0033926	GO:0005886//plasma membrane;GO:0005634//nucleus;GO:0005829//cytosol
CL2197.Contig14_All	2314	GO:0005975//carbohydrate metabolic process;GO:0048364//root development;GO:0006520//cellular amino acid metabolic process	GO:0004575//sucrose alpha-glucosidase activity;GO:0033926	GO:0005886//plasma membrane;GO:0005634//nucleus;GO:0005829//cytosol
CL2197.Contig15_All	2324	GO:0005975//carbohydrate metabolic process;GO:0048364//root development;GO:0006520//cellular amino acid metabolic process	GO:0004575//sucrose alpha-glucosidase activity;GO:0033926	GO:0005886//plasma membrane;GO:0005634//nucleus;GO:0005829//cytosol
CL2197.Contig16_All	2251	GO:0005975//carbohydrate metabolic process;GO:0048364//root development;GO:0006520//cellular amino acid metabolic process	GO:0004575//sucrose alpha-glucosidase activity;GO:0033926	GO:0005886//plasma membrane;GO:0005634//nucleus;GO:0005829//cytosol
CL2197.Contig17_All	3157	GO:0048364//root development;GO:0010075//regulation of meristem growth;GO:0006520//cellular amino acid metabolic process;GO:0005987//sucrose catabolic process	GO:0033926;GO:0004575//sucrose alpha-glucosidase activity	GO:0005829//cytosol;GO:0005634//nucleus;GO:0005886//plasma membrane
CL2197.Contig18_All	3043	GO:0005975//carbohydrate metabolic process;GO:0048364//root development;GO:0006520//cellular amino acid metabolic process	GO:0004575//sucrose alpha-glucosidase activity;GO:0033926	GO:0005886//plasma membrane;GO:0005634//nucleus;GO:0005829//cytosol
CL2197.Contig1_All	2133	GO:0005975//carbohydrate metabolic process;GO:0048364//root development;GO:0006520//cellular amino acid metabolic process	GO:0004575//sucrose alpha-glucosidase activity;GO:0033926	GO:0005886//plasma membrane;GO:0005634//nucleus;GO:0005829//cytosol
CL2197.Contig2_All	2135	GO:0005975//carbohydrate metabolic process;GO:0048364//root development;GO:0006520//cellular amino acid metabolic process	GO:0004575//sucrose alpha-glucosidase activity;GO:0033926	GO:0005886//plasma membrane;GO:0005634//nucleus;GO:0005829//cytosol
CL2197.Contig3_All	2736	GO:0005975//carbohydrate metabolic process;GO:0048364//root development;GO:0006520//cellular amino acid metabolic process	GO:0004575//sucrose alpha-glucosidase activity;GO:0033926	GO:0005886//plasma membrane;GO:0005634//nucleus;GO:0005829//cytosol
CL2197.Contig4_All	2197	GO:0005975//carbohydrate metabolic process;GO:0048364//root development;GO:0006520//cellular amino acid metabolic process	GO:0004575//sucrose alpha-glucosidase activity;GO:0033926	GO:0005886//plasma membrane;GO:0005634//nucleus;GO:0005829//cytosol
CL2197.Contig5_All	3258	GO:0005975//carbohydrate metabolic process;GO:0048364//root development;GO:0006520//cellular amino acid metabolic process	GO:0004575//sucrose alpha-glucosidase activity;GO:0033926	GO:0005886//plasma membrane;GO:0005634//nucleus;GO:0005829//cytosol
CL2197.Contig6_All	2808	GO:0005975//carbohydrate metabolic process;GO:0048364//root development;GO:0006520//cellular amino acid metabolic process	GO:0004575//sucrose alpha-glucosidase activity;GO:0033926	GO:0005886//plasma membrane;GO:0005634//nucleus;GO:0005829//cytosol
CL2197.Contig7_All	2194	GO:0005975//carbohydrate metabolic process;GO:0048364//root development;GO:0006520//cellular amino acid metabolic process	GO:0004575//sucrose alpha-glucosidase activity;GO:0033926	GO:0005886//plasma membrane;GO:0005634//nucleus;GO:0005829//cytosol
CL2197.Contig8_All	2610	GO:0005975//carbohydrate metabolic process;GO:0048364//root development;GO:0006520//cellular amino acid metabolic process	GO:0004575//sucrose alpha-glucosidase activity;GO:0033926	GO:0005886//plasma membrane;GO:0005634//nucleus;GO:0005829//cytosol
CL2197.Contig9_All	2390	GO:0005975//carbohydrate metabolic process;GO:0048364//root development;GO:0006520//cellular amino acid metabolic process	GO:0004575//sucrose alpha-glucosidase activity;GO:0033926	GO:0005886//plasma membrane;GO:0005634//nucleus;GO:0005829//cytosol
CL2199.Contig1_All	539	GO:0042742//defense response to bacterium;GO:0050832//defense response to fungus;GO:0048364//root development;GO:0071433//cell wall repair	-	GO:0009536//plastid;GO:0005739//mitochondrion
CL2199.Contig2_All	802	GO:0042742//defense response to bacterium;GO:0050832//defense response to fungus;GO:0048364//root development;GO:0071433//cell wall repair	-	GO:0009536//plastid;GO:0005739//mitochondrion
CL2199.Contig3_All	742	GO:0042742//defense response to bacterium;GO:0050832//defense response to fungus;GO:0048364//root development;GO:0071433//cell wall repair	-	GO:0005739//mitochondrion
CL2199.Contig4_All	510	GO:0042742//defense response to bacterium;GO:0050832//defense response to fungus;GO:0048364//root development;GO:0071433//cell wall repair	-	GO:0009536//plastid;GO:0005739//mitochondrion
CL2270.Contig4_All	3838	GO:0035556//intracellular signal transduction;GO:0006511//ubiquitin-dependent protein catabolic process;GO:0009958//positive gravitropism;GO:0048364//root development;GO:0006623//protein targeting to vacuole;GO:0051788//response to misfolded protein;GO:0008333//endosome to lysosome transport;GO:0080129//proteasome core complex assembly;GO:0006896//Golgi to vacuole transport;GO:0006944//cellular m…	GO:0035091//phosphatidylinositol binding;GO:0005515//protein binding	GO:0005829//cytosol;GO:0030904//retromer complex;GO:0005771//multivesicular body;GO:0009507//chloroplast
CL2354.Contig1_All	1743	GO:0048364//root development;GO:0009850//auxin metabolic process;GO:0019277;GO:0030259//lipid glycosylation;GO:0009826//unidimensional cell growth;GO:0006468//protein phosphorylation;GO:0009741//response to brassinosteroid stimulus	GO:0030246//carbohydrate binding;GO:0004712//protein serine/threonine/tyrosine kinase activity;GO:0004674//protein serine/threonine kinase activity;GO:0005524//ATP binding;GO:0050511//undecaprenyldiphospho-muramoylpentapeptide beta-N-acetylglucosaminyltransferase activity	GO:0005737//cytoplasm;GO:0009506//plasmodesma;GO:0005886//plasma membrane;GO:0005634//nucleus
CL2354.Contig2_All	1714	GO:0048364//root development;GO:0009850//auxin metabolic process;GO:0019277;GO:0030259//lipid glycosylation;GO:0009826//unidimensional cell growth;GO:0006468//protein phosphorylation;GO:0009741//response to brassinosteroid stimulus	GO:0030246//carbohydrate binding;GO:0004712//protein serine/threonine/tyrosine kinase activity;GO:0004674//protein serine/threonine kinase activity;GO:0005524//ATP binding;GO:0050511//undecaprenyldiphospho-muramoylpentapeptide beta-N-acetylglucosaminyltransferase activity	GO:0005737//cytoplasm;GO:0009506//plasmodesma;GO:0005886//plasma membrane;GO:0005634//nucleus
CL2354.Contig3_All	351	GO:0048364//root development;GO:0009850//auxin metabolic process;GO:0019277;GO:0030259//lipid glycosylation;GO:0009826//unidimensional cell growth;GO:0006468//protein phosphorylation;GO:0009741//response to brassinosteroid stimulus	GO:0030246//carbohydrate binding;GO:0004712//protein serine/threonine/tyrosine kinase activity;GO:0004674//protein serine/threonine kinase activity;GO:0005524//ATP binding;GO:0050511//undecaprenyldiphospho-muramoylpentapeptide beta-N-acetylglucosaminyltransferase activity	GO:0005737//cytoplasm;GO:0009506//plasmodesma;GO:0005886//plasma membrane;GO:0005634//nucleus
CL2401.Contig5_All	1059	GO:0015819//lysine transport;GO:0048589//developmental growth;GO:0010106//cellular response to iron ion starvation;GO:0015706//nitrate transport;GO:0006826//iron ion transport;GO:0015808//L-alanine transport;GO:0015813//L-glutamate transport;GO:0048527//lateral root development;GO:0003333//amino acid transmembrane transport;GO:0048765//root hair cell differentiation;GO:0010167//response to nitrat…	GO:0015189//L-lysine transmembrane transporter activity;GO:0016740//transferase activity;GO:0005313//L-glutamate transmembrane transporter activity;GO:0015180//L-alanine transmembrane transporter activity;GO:0015185//gamma-aminobutyric acid transmembrane transporter activity;GO:0003996//acyl-CoA ligase activity;GO:0015181//arginine transmembrane transporter activity	GO:0016021//integral to membrane;GO:0005783//endoplasmic reticulum;GO:0005634//nucleus;GO:0005739//mitochondrion
CL2401.Contig6_All	772	GO:0015819//lysine transport;GO:0048589//developmental growth;GO:0010106//cellular response to iron ion starvation;GO:0015706//nitrate transport;GO:0006826//iron ion transport;GO:0015808//L-alanine transport;GO:0015813//L-glutamate transport;GO:0048527//lateral root development;GO:0003333//amino acid transmembrane transport;GO:0048765//root hair cell differentiation;GO:0010167//response to nitrat…	GO:0015189//L-lysine transmembrane transporter activity;GO:0016740//transferase activity;GO:0005313//L-glutamate transmembrane transporter activity;GO:0015180//L-alanine transmembrane transporter activity;GO:0015185//gamma-aminobutyric acid transmembrane transporter activity;GO:0003996//acyl-CoA ligase activity;GO:0015181//arginine transmembrane transporter activity	GO:0016021//integral to membrane;GO:0005783//endoplasmic reticulum;GO:0005634//nucleus;GO:0005739//mitochondrion
CL2401.Contig7_All	952	GO:0015819//lysine transport;GO:0048589//developmental growth;GO:0010106//cellular response to iron ion starvation;GO:0015706//nitrate transport;GO:0006826//iron ion transport;GO:0015808//L-alanine transport;GO:0015813//L-glutamate transport;GO:0048527//lateral root development;GO:0003333//amino acid transmembrane transport;GO:0048765//root hair cell differentiation;GO:0010167//response to nitrat…	GO:0015189//L-lysine transmembrane transporter activity;GO:0016740//transferase activity;GO:0005313//L-glutamate transmembrane transporter activity;GO:0015180//L-alanine transmembrane transporter activity;GO:0015185//gamma-aminobutyric acid transmembrane transporter activity;GO:0003996//acyl-CoA ligase activity;GO:0015181//arginine transmembrane transporter activity	GO:0016021//integral to membrane;GO:0005783//endoplasmic reticulum;GO:0005634//nucleus;GO:0005739//mitochondrion
CL2631.Contig10_All	1220	GO:0009958//positive gravitropism;GO:0048364//root development;GO:0009638//phototropism;GO:0048573//photoperiodism, flowering;GO:0006508//proteolysis;GO:0009415//response to water stimulus	GO:0008236//serine-type peptidase activity	GO:0019866//organelle inner membrane;GO:0016023//cytoplasmic membrane-bounded vesicle;GO:0005773//vacuole;GO:0005783//endoplasmic reticulum;GO:0005634//nucleus;GO:0005886//plasma membrane;GO:0048046//apoplast
CL2631.Contig11_All	2073	GO:0009958//positive gravitropism;GO:0048364//root development;GO:0009638//phototropism;GO:0048573//photoperiodism, flowering;GO:0006508//proteolysis;GO:0009415//response to water stimulus	GO:0008236//serine-type peptidase activity	GO:0019866//organelle inner membrane;GO:0016023//cytoplasmic membrane-bounded vesicle;GO:0005773//vacuole;GO:0005783//endoplasmic reticulum;GO:0005634//nucleus;GO:0005886//plasma membrane;GO:0048046//apoplast
CL2631.Contig1_All	1618	GO:0048364//root development	-	GO:0019866//organelle inner membrane;GO:0016023//cytoplasmic membrane-bounded vesicle;GO:0005886//plasma membrane;GO:0005783//endoplasmic reticulum
CL2631.Contig2_All	1968	GO:0009958//positive gravitropism;GO:0048364//root development;GO:0009638//phototropism;GO:0048573//photoperiodism, flowering;GO:0006508//proteolysis;GO:0009415//response to water stimulus	GO:0008236//serine-type peptidase activity	GO:0019866//organelle inner membrane;GO:0016023//cytoplasmic membrane-bounded vesicle;GO:0005773//vacuole;GO:0005783//endoplasmic reticulum;GO:0005634//nucleus;GO:0005886//plasma membrane;GO:0048046//apoplast
CL2631.Contig3_All	1704	GO:0048364//root development	-	GO:0019866//organelle inner membrane;GO:0016023//cytoplasmic membrane-bounded vesicle;GO:0005886//plasma membrane;GO:0005783//endoplasmic reticulum
CL2631.Contig4_All	1346	GO:0048364//root development	-	GO:0019866//organelle inner membrane;GO:0016023//cytoplasmic membrane-bounded vesicle;GO:0005886//plasma membrane;GO:0005783//endoplasmic reticulum
CL2631.Contig5_All	817	GO:0048364//root development	-	GO:0019866//organelle inner membrane;GO:0016023//cytoplasmic membrane-bounded vesicle;GO:0005886//plasma membrane;GO:0005783//endoplasmic reticulum
CL2631.Contig6_All	1530	GO:0048364//root development	-	GO:0019866//organelle inner membrane;GO:0016023//cytoplasmic membrane-bounded vesicle;GO:0005886//plasma membrane;GO:0005783//endoplasmic reticulum
CL2631.Contig7_All	1231	GO:0009958//positive gravitropism;GO:0048364//root development;GO:0009638//phototropism;GO:0048573//photoperiodism, flowering;GO:0006508//proteolysis;GO:0009415//response to water stimulus	GO:0008236//serine-type peptidase activity	GO:0019866//organelle inner membrane;GO:0016023//cytoplasmic membrane-bounded vesicle;GO:0005773//vacuole;GO:0005783//endoplasmic reticulum;GO:0005634//nucleus;GO:0005886//plasma membrane;GO:0048046//apoplast
CL2631.Contig8_All	1761	GO:0009958//positive gravitropism;GO:0048364//root development;GO:0009638//phototropism;GO:0048573//photoperiodism, flowering;GO:0006508//proteolysis;GO:0009415//response to water stimulus	GO:0008236//serine-type peptidase activity	GO:0019866//organelle inner membrane;GO:0016023//cytoplasmic membrane-bounded vesicle;GO:0005773//vacuole;GO:0005783//endoplasmic reticulum;GO:0005634//nucleus;GO:0005886//plasma membrane;GO:0048046//apoplast
CL2631.Contig9_All	1876	GO:0009958//positive gravitropism;GO:0048364//root development;GO:0009638//phototropism;GO:0048573//photoperiodism, flowering;GO:0006508//proteolysis;GO:0009415//response to water stimulus	GO:0008236//serine-type peptidase activity	GO:0019866//organelle inner membrane;GO:0016023//cytoplasmic membrane-bounded vesicle;GO:0005773//vacuole;GO:0005783//endoplasmic reticulum;GO:0005634//nucleus;GO:0005886//plasma membrane;GO:0048046//apoplast
CL2734.Contig2_All	5272	GO:0009753//response to jasmonic acid stimulus;GO:0055114//oxidation-reduction process;GO:0048364//root development;GO:0009611//response to wounding;GO:0009737//response to abscisic acid stimulus;GO:0009816//defense response to bacterium, incompatible interaction;GO:0031408//oxylipin biosynthetic process	GO:0016165//lipoxygenase activity;GO:0005506//iron ion binding	GO:0009507//chloroplast
CL2734.Contig3_All	4874	GO:0009753//response to jasmonic acid stimulus;GO:0055114//oxidation-reduction process;GO:0048364//root development;GO:0009611//response to wounding;GO:0009737//response to abscisic acid stimulus;GO:0009816//defense response to bacterium, incompatible interaction;GO:0031408//oxylipin biosynthetic process	GO:0016165//lipoxygenase activity;GO:0005506//iron ion binding	GO:0009507//chloroplast
CL2783.Contig1_All	1773	GO:0048364//root development;GO:0060267//positive regulation of respiratory burst;GO:0048367//shoot system development;GO:0007165//signal transduction;GO:0046686//response to cadmium ion;GO:0050832//defense response to fungus	GO:0004871//signal transducer activity;GO:0005515//protein binding	GO:0005730//nucleolus;GO:0009507//chloroplast;GO:0022626//cytosolic ribosome;GO:0005886//plasma membrane
CL2783.Contig2_All	1271	GO:0048364//root development;GO:0060267//positive regulation of respiratory burst;GO:0048367//shoot system development;GO:0007165//signal transduction;GO:0046686//response to cadmium ion;GO:0050832//defense response to fungus	GO:0004871//signal transducer activity;GO:0005515//protein binding	GO:0005730//nucleolus;GO:0009507//chloroplast;GO:0022626//cytosolic ribosome;GO:0005886//plasma membrane
CL2783.Contig3_All	1625	GO:0048364//root development;GO:0060267//positive regulation of respiratory burst;GO:0048367//shoot system development;GO:0007165//signal transduction;GO:0046686//response to cadmium ion;GO:0050832//defense response to fungus	GO:0004871//signal transducer activity;GO:0005515//protein binding	GO:0005730//nucleolus;GO:0009507//chloroplast;GO:0022626//cytosolic ribosome;GO:0005886//plasma membrane
CL2783.Contig4_All	1714	GO:0048364//root development;GO:0060267//positive regulation of respiratory burst;GO:0048367//shoot system development;GO:0007165//signal transduction;GO:0046686//response to cadmium ion;GO:0050832//defense response to fungus	GO:0004871//signal transducer activity;GO:0005515//protein binding	GO:0005730//nucleolus;GO:0009507//chloroplast;GO:0022626//cytosolic ribosome;GO:0005886//plasma membrane
CL2783.Contig5_All	213	GO:0048364//root development;GO:0060267//positive regulation of respiratory burst;GO:0048367//shoot system development;GO:0016310//phosphorylation;GO:0007165//signal transduction;GO:0046686//response to cadmium ion;GO:0050832//defense response to fungus	GO:0004871//signal transducer activity;GO:0016905//myosin heavy chain kinase activity;GO:0005515//protein binding	GO:0005730//nucleolus;GO:0009507//chloroplast;GO:0022626//cytosolic ribosome;GO:0005886//plasma membrane
CL2783.Contig6_All	311	GO:0048364//root development;GO:0060267//positive regulation of respiratory burst;GO:0048367//shoot system development;GO:0007165//signal transduction;GO:0046686//response to cadmium ion;GO:0050832//defense response to fungus	GO:0004871//signal transducer activity;GO:0005515//protein binding	GO:0005730//nucleolus;GO:0009507//chloroplast;GO:0022626//cytosolic ribosome;GO:0005886//plasma membrane
CL2783.Contig7_All	1598	GO:0048364//root development;GO:0060267//positive regulation of respiratory burst;GO:0048367//shoot system development;GO:0007165//signal transduction;GO:0046686//response to cadmium ion;GO:0050832//defense response to fungus	GO:0004871//signal transducer activity;GO:0005515//protein binding	GO:0005730//nucleolus;GO:0009507//chloroplast;GO:0022626//cytosolic ribosome;GO:0005886//plasma membrane
CL2783.Contig8_All	1384	GO:0048364//root development;GO:0060267//positive regulation of respiratory burst;GO:0048367//shoot system development;GO:0007165//signal transduction;GO:0046686//response to cadmium ion;GO:0050832//defense response to fungus	GO:0004871//signal transducer activity;GO:0005515//protein binding	GO:0005730//nucleolus;GO:0009507//chloroplast;GO:0022626//cytosolic ribosome;GO:0005886//plasma membrane
CL2783.Contig9_All	1258	GO:0048364//root development;GO:0060267//positive regulation of respiratory burst;GO:0048367//shoot system development;GO:0007165//signal transduction;GO:0046686//response to cadmium ion;GO:0050832//defense response to fungus	GO:0004871//signal transducer activity;GO:0005515//protein binding	GO:0005730//nucleolus;GO:0009507//chloroplast;GO:0022626//cytosolic ribosome;GO:0005886//plasma membrane
CL2997.Contig1_All	4294	GO:0010218//response to far red light;GO:0010048//vernalization response;GO:0010541//acropetal auxin transport;GO:0009825//multidimensional cell growth;GO:0009958//positive gravitropism;GO:0007389//pattern specification process;GO:0009624//response to nematode;GO:0043481//anthocyanin accumulation in tissues in response to UV light;GO:0048767//root hair elongation;GO:0009640//photomorphogenesis;GO…	GO:0005515//protein binding;GO:0010329//auxin efflux transmembrane transporter activity;GO:0008559//xenobiotic-transporting ATPase activity;GO:0005524//ATP binding	GO:0016021//integral to membrane;GO:0005886//plasma membrane
CL2997.Contig2_All	3997	GO:0010218//response to far red light;GO:0010048//vernalization response;GO:0010541//acropetal auxin transport;GO:0009825//multidimensional cell growth;GO:0009958//positive gravitropism;GO:0007389//pattern specification process;GO:0009624//response to nematode;GO:0043481//anthocyanin accumulation in tissues in response to UV light;GO:0048767//root hair elongation;GO:0009640//photomorphogenesis;GO…	GO:0005515//protein binding;GO:0010329//auxin efflux transmembrane transporter activity;GO:0008559//xenobiotic-transporting ATPase activity;GO:0005524//ATP binding	GO:0016021//integral to membrane;GO:0005886//plasma membrane
CL2997.Contig3_All	4462	GO:0010218//response to far red light;GO:0010048//vernalization response;GO:0010541//acropetal auxin transport;GO:0009825//multidimensional cell growth;GO:0009958//positive gravitropism;GO:0007389//pattern specification process;GO:0009624//response to nematode;GO:0043481//anthocyanin accumulation in tissues in response to UV light;GO:0048767//root hair elongation;GO:0009640//photomorphogenesis;GO…	GO:0005515//protein binding;GO:0010329//auxin efflux transmembrane transporter activity;GO:0008559//xenobiotic-transporting ATPase activity;GO:0005524//ATP binding	GO:0016021//integral to membrane;GO:0005886//plasma membrane
CL2997.Contig4_All	4600	GO:0010218//response to far red light;GO:0010048//vernalization response;GO:0010541//acropetal auxin transport;GO:0009825//multidimensional cell growth;GO:0009958//positive gravitropism;GO:0007389//pattern specification process;GO:0009624//response to nematode;GO:0043481//anthocyanin accumulation in tissues in response to UV light;GO:0048767//root hair elongation;GO:0009640//photomorphogenesis;GO…	GO:0005515//protein binding;GO:0010329//auxin efflux transmembrane transporter activity;GO:0008559//xenobiotic-transporting ATPase activity;GO:0005524//ATP binding	GO:0016021//integral to membrane;GO:0005886//plasma membrane
CL2997.Contig6_All	4392	GO:0010218//response to far red light;GO:0010048//vernalization response;GO:0010541//acropetal auxin transport;GO:0009825//multidimensional cell growth;GO:0009958//positive gravitropism;GO:0007389//pattern specification process;GO:0009624//response to nematode;GO:0043481//anthocyanin accumulation in tissues in response to UV light;GO:0048767//root hair elongation;GO:0009640//photomorphogenesis;GO…	GO:0005515//protein binding;GO:0010329//auxin efflux transmembrane transporter activity;GO:0008559//xenobiotic-transporting ATPase activity;GO:0005524//ATP binding	GO:0016021//integral to membrane;GO:0005886//plasma membrane
CL2997.Contig7_All	3989	GO:0010218//response to far red light;GO:0010048//vernalization response;GO:0010541//acropetal auxin transport;GO:0009825//multidimensional cell growth;GO:0009958//positive gravitropism;GO:0007389//pattern specification process;GO:0009624//response to nematode;GO:0043481//anthocyanin accumulation in tissues in response to UV light;GO:0048767//root hair elongation;GO:0009640//photomorphogenesis;GO…	GO:0005515//protein binding;GO:0010329//auxin efflux transmembrane transporter activity;GO:0008559//xenobiotic-transporting ATPase activity;GO:0005524//ATP binding	GO:0016021//integral to membrane;GO:0005886//plasma membrane
CL3206.Contig1_All	1799	GO:0048367//shoot system development;GO:0048364//root development	-	GO:0005739//mitochondrion;GO:0009507//chloroplast
CL3206.Contig2_All	2041	GO:0048367//shoot system development;GO:0048364//root development	-	GO:0005739//mitochondrion;GO:0009507//chloroplast
CL3206.Contig4_All	1670	GO:0048367//shoot system development;GO:0048364//root development	-	GO:0005739//mitochondrion;GO:0009507//chloroplast
CL3214.Contig1_All	1339	GO:0019722//calcium-mediated signaling;GO:0048364//root development;GO:0045324//late endosome to vacuole transport	GO:0005515//protein binding	GO:0005768//endosome;GO:0005634//nucleus;GO:0031083//BLOC-1 complex
CL3214.Contig2_All	1182	GO:0019722//calcium-mediated signaling;GO:0048364//root development;GO:0045324//late endosome to vacuole transport	GO:0005515//protein binding	GO:0005768//endosome;GO:0005634//nucleus;GO:0031083//BLOC-1 complex
CL3266.Contig1_All	2836	GO:0045931//positive regulation of mitotic cell cycle;GO:0044238//primary metabolic process;GO:0048364//root development;GO:0044260;GO:0009294//DNA mediated transformation	GO:0016740//transferase activity	-
CL3266.Contig3_All	2841	GO:0045931//positive regulation of mitotic cell cycle;GO:0048364//root development;GO:0009294//DNA mediated transformation;GO:0000956//nuclear-transcribed mRNA catabolic process	GO:0016740//transferase activity	-
CL3288.Contig1_All	1038	GO:0055085//transmembrane transport;GO:0010338//leaf formation;GO:0048364//root development;GO:0010358//leaf shaping;GO:0009926//auxin polar transport;GO:0009908//flower development;GO:0010051//xylem and phloem pattern formation;GO:0010229//inflorescence development;GO:0009630//gravitropism;GO:0048826//cotyledon morphogenesis	-	GO:0009925//basal plasma membrane;GO:0016021//integral to membrane;GO:0005737//cytoplasm;GO:0045177//apical part of cell
CL3421.Contig1_All	3331	GO:0048364//root development;GO:0010154//fruit development;GO:0009908//flower development;GO:0048366//leaf development;GO:0016579//protein deubiquitination;GO:0008283//cell proliferation	GO:0004843//ubiquitin-specific protease activity	GO:0016023//cytoplasmic membrane-bounded vesicle;GO:0005634//nucleus
CL3421.Contig6_All	3307	GO:0048364//root development;GO:0010154//fruit development;GO:0009908//flower development;GO:0048366//leaf development;GO:0016579//protein deubiquitination;GO:0008283//cell proliferation	GO:0004843//ubiquitin-specific protease activity	GO:0016023//cytoplasmic membrane-bounded vesicle;GO:0005634//nucleus
CL3421.Contig7_All	3226	GO:0048364//root development;GO:0010154//fruit development;GO:0009908//flower development;GO:0048366//leaf development;GO:0016579//protein deubiquitination;GO:0008283//cell proliferation	GO:0004843//ubiquitin-specific protease activity	GO:0016023//cytoplasmic membrane-bounded vesicle;GO:0005634//nucleus
CL395.Contig10_All	1153	GO:0048497//maintenance of floral organ identity;GO:0006355//regulation of transcription, DNA-dependent;GO:0010440//stomatal lineage progression;GO:0048578//positive regulation of long-day photoperiodism, flowering;GO:0048527//lateral root development;GO:0048366//leaf development;GO:0055114//oxidation-reduction process;GO:0048481//ovule development;GO:0007584//response to nutrient;GO:0048443//sta…	GO:0032440//2-alkenal reductase [NAD(P)] activity;GO:0046983//protein dimerization activity;GO:0003677//DNA binding;GO:0003700//sequence-specific DNA binding transcription factor activity;GO:0008134//transcription factor binding	GO:0005634//nucleus
CL395.Contig13_All	943	GO:0048497//maintenance of floral organ identity;GO:0006355//regulation of transcription, DNA-dependent;GO:0010440//stomatal lineage progression;GO:0048578//positive regulation of long-day photoperiodism, flowering;GO:0048527//lateral root development;GO:0048366//leaf development;GO:0055114//oxidation-reduction process;GO:0048481//ovule development;GO:0007584//response to nutrient;GO:0048443//sta…	GO:0032440//2-alkenal reductase [NAD(P)] activity;GO:0046983//protein dimerization activity;GO:0003677//DNA binding;GO:0003700//sequence-specific DNA binding transcription factor activity;GO:0008134//transcription factor binding	GO:0005634//nucleus
CL395.Contig14_All	1507	GO:0010440//stomatal lineage progression;GO:0055114//oxidation-reduction process;GO:0006355//regulation of transcription, DNA-dependent;GO:0007584//response to nutrient;GO:0048527//lateral root development;GO:0048578//positive regulation of long-day photoperiodism, flowering	GO:0003677//DNA binding;GO:0046983//protein dimerization activity;GO:0003700//sequence-specific DNA binding transcription factor activity;GO:0032440//2-alkenal reductase [NAD(P)] activity;GO:0008134//transcription factor binding	GO:0005634//nucleus
CL395.Contig15_All	1422	GO:0010440//stomatal lineage progression;GO:0055114//oxidation-reduction process;GO:0006355//regulation of transcription, DNA-dependent;GO:0007584//response to nutrient;GO:0048527//lateral root development;GO:0048578//positive regulation of long-day photoperiodism, flowering	GO:0003677//DNA binding;GO:0046983//protein dimerization activity;GO:0003700//sequence-specific DNA binding transcription factor activity;GO:0032440//2-alkenal reductase [NAD(P)] activity;GO:0008134//transcription factor binding	GO:0005634//nucleus
CL395.Contig16_All	2823	GO:0006355//regulation of transcription, DNA-dependent;GO:0010440//stomatal lineage progression;GO:0048578//positive regulation of long-day photoperiodism, flowering;GO:0048527//lateral root development;GO:0055114//oxidation-reduction process;GO:0007584//response to nutrient;GO:0048440//carpel development	GO:0032440//2-alkenal reductase [NAD(P)] activity;GO:0046983//protein dimerization activity;GO:0003677//DNA binding;GO:0003700//sequence-specific DNA binding transcription factor activity;GO:0008134//transcription factor binding	GO:0005634//nucleus
CL395.Contig19_All	2917	GO:0010440//stomatal lineage progression;GO:0055114//oxidation-reduction process;GO:0006355//regulation of transcription, DNA-dependent;GO:0007584//response to nutrient;GO:0048527//lateral root development;GO:0048578//positive regulation of long-day photoperiodism, flowering	GO:0003677//DNA binding;GO:0046983//protein dimerization activity;GO:0003700//sequence-specific DNA binding transcription factor activity;GO:0032440//2-alkenal reductase [NAD(P)] activity;GO:0008134//transcription factor binding	GO:0005634//nucleus
CL395.Contig21_All	3049	GO:0048497//maintenance of floral organ identity;GO:0006355//regulation of transcription, DNA-dependent;GO:0010440//stomatal lineage progression;GO:0048578//positive regulation of long-day photoperiodism, flowering;GO:0048527//lateral root development;GO:0048366//leaf development;GO:0055114//oxidation-reduction process;GO:0048481//ovule development;GO:0007584//response to nutrient;GO:0048443//sta…	GO:0032440//2-alkenal reductase [NAD(P)] activity;GO:0046983//protein dimerization activity;GO:0003677//DNA binding;GO:0003700//sequence-specific DNA binding transcription factor activity;GO:0008134//transcription factor binding	GO:0005634//nucleus
CL395.Contig22_All	3144	GO:0048497//maintenance of floral organ identity;GO:0006355//regulation of transcription, DNA-dependent;GO:0010440//stomatal lineage progression;GO:0048578//positive regulation of long-day photoperiodism, flowering;GO:0048527//lateral root development;GO:0048366//leaf development;GO:0055114//oxidation-reduction process;GO:0048481//ovule development;GO:0007584//response to nutrient;GO:0048443//sta…	GO:0032440//2-alkenal reductase [NAD(P)] activity;GO:0046983//protein dimerization activity;GO:0003677//DNA binding;GO:0003700//sequence-specific DNA binding transcription factor activity;GO:0008134//transcription factor binding	GO:0005634//nucleus
CL395.Contig6_All	1010	GO:0048497//maintenance of floral organ identity;GO:0006355//regulation of transcription, DNA-dependent;GO:0010440//stomatal lineage progression;GO:0048578//positive regulation of long-day photoperiodism, flowering;GO:0048527//lateral root development;GO:0048366//leaf development;GO:0055114//oxidation-reduction process;GO:0048481//ovule development;GO:0007584//response to nutrient;GO:0048443//sta…	GO:0032440//2-alkenal reductase [NAD(P)] activity;GO:0046983//protein dimerization activity;GO:0003677//DNA binding;GO:0003700//sequence-specific DNA binding transcription factor activity;GO:0008134//transcription factor binding	GO:0005634//nucleus
CL395.Contig8_All	884	GO:0048589//developmental growth;GO:0045492//xylan biosynthetic process;GO:0007155//cell adhesion;GO:0006944//cellular membrane fusion;GO:0045010//actin nucleation;GO:0033044//regulation of chromosome organization;GO:0006355//regulation of transcription, DNA-dependent;GO:0010090//trichome morphogenesis;GO:0071249//cellular response to nitrate;GO:0048527//lateral root development;GO:0009556//micro…	GO:0032440//2-alkenal reductase [NAD(P)] activity;GO:0046983//protein dimerization activity;GO:0003677//DNA binding;GO:0003700//sequence-specific DNA binding transcription factor activity;GO:0008134//transcription factor binding	GO:0005634//nucleus
CL4018.Contig2_All	426	GO:0006655//phosphatidylglycerol biosynthetic process;GO:0007638//mechanosensory behavior;GO:0070509//calcium ion import;GO:0007020//microtubule nucleation;GO:0019344//cysteine biosynthetic process;GO:0048528//post-embryonic root development;GO:0007231//osmosensory signaling pathway;GO:0033500//carbohydrate homeostasis	-	GO:0005887//integral to plasma membrane
CL4036.Contig1_All	974	GO:0000911//cytokinesis by cell plate formation;GO:0010048//vernalization response;GO:0000413//protein peptidyl-prolyl isomerization;GO:0006457//protein folding;GO:0009880//embryonic pattern specification;GO:0009735//response to cytokinin stimulus;GO:0000226//microtubule cytoskeleton organization;GO:0030154//cell differentiation;GO:0030010//establishment of cell polarity;GO:0048527//lateral root …	GO:0003755//peptidyl-prolyl cis-trans isomerase activity;GO:0005528//FK506 binding;GO:0005515//protein binding	GO:0005829//cytosol;GO:0016020//membrane;GO:0005783//endoplasmic reticulum;GO:0005634//nucleus
CL4036.Contig2_All	1973	GO:0000911//cytokinesis by cell plate formation;GO:0010048//vernalization response;GO:0000413//protein peptidyl-prolyl isomerization;GO:0006457//protein folding;GO:0009880//embryonic pattern specification;GO:0009735//response to cytokinin stimulus;GO:0000226//microtubule cytoskeleton organization;GO:0030154//cell differentiation;GO:0030010//establishment of cell polarity;GO:0048527//lateral root …	GO:0003755//peptidyl-prolyl cis-trans isomerase activity;GO:0005528//FK506 binding;GO:0005515//protein binding	GO:0005829//cytosol;GO:0016020//membrane;GO:0005783//endoplasmic reticulum;GO:0005634//nucleus
CL4036.Contig3_All	1710	GO:0000911//cytokinesis by cell plate formation;GO:0010048//vernalization response;GO:0000413//protein peptidyl-prolyl isomerization;GO:0006457//protein folding;GO:0009880//embryonic pattern specification;GO:0009735//response to cytokinin stimulus;GO:0000226//microtubule cytoskeleton organization;GO:0030154//cell differentiation;GO:0030010//establishment of cell polarity;GO:0048527//lateral root …	GO:0003755//peptidyl-prolyl cis-trans isomerase activity;GO:0005528//FK506 binding;GO:0005515//protein binding	GO:0005829//cytosol;GO:0016020//membrane;GO:0005783//endoplasmic reticulum;GO:0005634//nucleus
CL4036.Contig4_All	1707	GO:0000911//cytokinesis by cell plate formation;GO:0010048//vernalization response;GO:0000413//protein peptidyl-prolyl isomerization;GO:0006457//protein folding;GO:0009880//embryonic pattern specification;GO:0009735//response to cytokinin stimulus;GO:0000226//microtubule cytoskeleton organization;GO:0030154//cell differentiation;GO:0030010//establishment of cell polarity;GO:0048527//lateral root …	GO:0003755//peptidyl-prolyl cis-trans isomerase activity;GO:0005528//FK506 binding;GO:0005515//protein binding	GO:0005829//cytosol;GO:0016020//membrane;GO:0005783//endoplasmic reticulum;GO:0005634//nucleus
CL4246.Contig1_All	2012	GO:0031348//negative regulation of defense response;GO:0016036//cellular response to phosphate starvation;GO:0019375//galactolipid biosynthetic process;GO:0009867//jasmonic acid mediated signaling pathway;GO:0009862//systemic acquired resistance, salicylic acid mediated signaling pathway;GO:0010363//regulation of plant-type hypersensitive response;GO:0042631//cellular response to water deprivatio…	GO:0004630//phospholipase D activity;GO:0032440//2-alkenal reductase [NAD(P)] activity;GO:0005543//phospholipid binding;GO:0070290//NAPE-specific phospholipase D activity	GO:0005737//cytoplasm
CL4246.Contig2_All	3297	GO:0031348//negative regulation of defense response;GO:0016036//cellular response to phosphate starvation;GO:0019375//galactolipid biosynthetic process;GO:0009867//jasmonic acid mediated signaling pathway;GO:0009862//systemic acquired resistance, salicylic acid mediated signaling pathway;GO:0010363//regulation of plant-type hypersensitive response;GO:0042631//cellular response to water deprivatio…	GO:0004630//phospholipase D activity;GO:0032440//2-alkenal reductase [NAD(P)] activity;GO:0005543//phospholipid binding;GO:0070290//NAPE-specific phospholipase D activity	GO:0005737//cytoplasm
CL4324.Contig1_All	358	GO:0048364//root development;GO:0042542//response to hydrogen peroxide;GO:0009864//induced systemic resistance, jasmonic acid mediated signaling pathway;GO:0010120//camalexin biosynthetic process;GO:0009651//response to salt stress;GO:2000038//regulation of stomatal complex development;GO:0051301//cell division;GO:0006468//protein phosphorylation;GO:0000165//MAPK cascade;GO:0009409//response to c…	GO:0004707//MAP kinase activity;GO:0005524//ATP binding	GO:0005802//trans-Golgi network;GO:0009524//phragmoplast;GO:0009574//preprophase band
CL4324.Contig2_All	1628	GO:0048364//root development;GO:0042542//response to hydrogen peroxide;GO:0009864//induced systemic resistance, jasmonic acid mediated signaling pathway;GO:0010120//camalexin biosynthetic process;GO:0009651//response to salt stress;GO:2000038//regulation of stomatal complex development;GO:0051301//cell division;GO:0006468//protein phosphorylation;GO:0000165//MAPK cascade;GO:0009409//response to c…	GO:0004707//MAP kinase activity;GO:0005524//ATP binding	GO:0005802//trans-Golgi network;GO:0009524//phragmoplast;GO:0009574//preprophase band
CL4324.Contig3_All	254	GO:0048364//root development;GO:0042542//response to hydrogen peroxide;GO:0009864//induced systemic resistance, jasmonic acid mediated signaling pathway;GO:0010120//camalexin biosynthetic process;GO:0009651//response to salt stress;GO:2000038//regulation of stomatal complex development;GO:0051301//cell division;GO:0006468//protein phosphorylation;GO:0000165//MAPK cascade;GO:0009409//response to c…	GO:0004707//MAP kinase activity;GO:0005524//ATP binding	GO:0005802//trans-Golgi network;GO:0009524//phragmoplast;GO:0009574//preprophase band
CL4324.Contig4_All	1638	GO:0048364//root development;GO:0042542//response to hydrogen peroxide;GO:0009864//induced systemic resistance, jasmonic acid mediated signaling pathway;GO:0010120//camalexin biosynthetic process;GO:0009651//response to salt stress;GO:2000038//regulation of stomatal complex development;GO:0051301//cell division;GO:0006468//protein phosphorylation;GO:0000165//MAPK cascade;GO:0009409//response to c…	GO:0004707//MAP kinase activity;GO:0005524//ATP binding	GO:0005802//trans-Golgi network;GO:0009524//phragmoplast;GO:0009574//preprophase band
CL4523.Contig10_All	2642	GO:0055085//transmembrane transport;GO:0010338//leaf formation;GO:0048830//adventitious root development;GO:0010358//leaf shaping;GO:0009926//auxin polar transport;GO:0009908//flower development;GO:0010051//xylem and phloem pattern formation;GO:0010229//inflorescence development;GO:0009630//gravitropism;GO:0048826//cotyledon morphogenesis;GO:0009734//auxin mediated signaling pathway	GO:0005215//transporter activity	GO:0009925//basal plasma membrane;GO:0016021//integral to membrane;GO:0009921;GO:0005737//cytoplasm;GO:0045177//apical part of cell
CL4523.Contig11_All	625	GO:0055085//transmembrane transport;GO:0009749//response to glucose stimulus;GO:0009958//positive gravitropism;GO:0048830//adventitious root development;GO:0009926//auxin polar transport;GO:0009640//photomorphogenesis;GO:0009637//response to blue light;GO:0008361//regulation of cell size;GO:0043481//anthocyanin accumulation in tissues in response to UV light;GO:0048443//stamen development;GO:0046…	GO:0010329//auxin efflux transmembrane transporter activity;GO:0009672//auxin:hydrogen symporter activity	GO:0009925//basal plasma membrane;GO:0000323//lytic vacuole;GO:0016021//integral to membrane;GO:0009921
CL4523.Contig12_All	3275	GO:0055085//transmembrane transport;GO:0010338//leaf formation;GO:0048830//adventitious root development;GO:0010358//leaf shaping;GO:0009926//auxin polar transport;GO:0009908//flower development;GO:0010051//xylem and phloem pattern formation;GO:0010229//inflorescence development;GO:0009630//gravitropism;GO:0048826//cotyledon morphogenesis;GO:0009734//auxin mediated signaling pathway	GO:0005215//transporter activity	GO:0009925//basal plasma membrane;GO:0016021//integral to membrane;GO:0009921;GO:0005737//cytoplasm;GO:0045177//apical part of cell
CL4523.Contig1_All	760	GO:0055085//transmembrane transport;GO:0009749//response to glucose stimulus;GO:0009958//positive gravitropism;GO:0010338//leaf formation;GO:0048364//root development;GO:0010358//leaf shaping;GO:0009926//auxin polar transport;GO:0009640//photomorphogenesis;GO:0010051//xylem and phloem pattern formation;GO:0010229//inflorescence development;GO:0009637//response to blue light;GO:0009733//response t…	GO:0010329//auxin efflux transmembrane transporter activity;GO:0009672//auxin:hydrogen symporter activity	GO:0009925//basal plasma membrane;GO:0000323//lytic vacuole;GO:0016021//integral to membrane;GO:0045177//apical part of cell
CL4523.Contig3_All	1449	GO:0010218//response to far red light;GO:0048766//root hair initiation;GO:0009825//multidimensional cell growth;GO:0009958//positive gravitropism;GO:0010082//regulation of root meristem growth;GO:0007389//pattern specification process;GO:0043481//anthocyanin accumulation in tissues in response to UV light;GO:0048767//root hair elongation;GO:0048830//adventitious root development;GO:0008356//asymm…	GO:0009672//auxin:hydrogen symporter activity;GO:0010329//auxin efflux transmembrane transporter activity	GO:0012506//vesicle membrane;GO:0009925//basal plasma membrane;GO:0016021//integral to membrane;GO:0000323//lytic vacuole;GO:0009986//cell surface;GO:0016328//lateral plasma membrane;GO:0009921
CL4523.Contig5_All	3132	GO:0055085//transmembrane transport;GO:0009958//positive gravitropism;GO:0010338//leaf formation;GO:0048830//adventitious root development;GO:0010358//leaf shaping;GO:0009926//auxin polar transport;GO:0009908//flower development;GO:0010051//xylem and phloem pattern formation;GO:0010229//inflorescence development;GO:0048826//cotyledon morphogenesis;GO:0009723//response to ethylene stimulus;GO:0010…	GO:0010329//auxin efflux transmembrane transporter activity	GO:0009925//basal plasma membrane;GO:0000323//lytic vacuole;GO:0016021//integral to membrane;GO:0009921;GO:0045177//apical part of cell
CL4523.Contig6_All	410	GO:0055085//transmembrane transport;GO:0010338//leaf formation;GO:0048364//root development;GO:0010358//leaf shaping;GO:0009926//auxin polar transport;GO:0009908//flower development;GO:0010051//xylem and phloem pattern formation;GO:0010229//inflorescence development;GO:0009630//gravitropism;GO:0048826//cotyledon morphogenesis	-	GO:0009925//basal plasma membrane;GO:0016021//integral to membrane;GO:0005737//cytoplasm;GO:0045177//apical part of cell
CL4523.Contig7_All	2055	GO:0060918//auxin transport;GO:0048364//root development;GO:0009965//leaf morphogenesis;GO:0009791//post-embryonic development;GO:0048608//reproductive structure development;GO:0009630//gravitropism;GO:0009734//auxin mediated signaling pathway;GO:0009790//embryo development	GO:0005215//transporter activity	GO:0044459//plasma membrane part;GO:0005737//cytoplasm
CL4523.Contig8_All	1866	GO:0060918//auxin transport;GO:0048364//root development;GO:0009965//leaf morphogenesis;GO:0009791//post-embryonic development;GO:0048608//reproductive structure development;GO:0009630//gravitropism;GO:0009734//auxin mediated signaling pathway;GO:0009790//embryo development	GO:0005215//transporter activity	GO:0044459//plasma membrane part;GO:0005737//cytoplasm
CL4523.Contig9_All	2437	GO:0055085//transmembrane transport;GO:0009958//positive gravitropism;GO:0010338//leaf formation;GO:0048830//adventitious root development;GO:0010358//leaf shaping;GO:0009926//auxin polar transport;GO:0009908//flower development;GO:0010051//xylem and phloem pattern formation;GO:0010229//inflorescence development;GO:0048826//cotyledon morphogenesis;GO:0009723//response to ethylene stimulus;GO:0010…	GO:0010329//auxin efflux transmembrane transporter activity	GO:0009925//basal plasma membrane;GO:0000323//lytic vacuole;GO:0016021//integral to membrane;GO:0009921;GO:0045177//apical part of cell
CL511.Contig1_All	1755	GO:0051788//response to misfolded protein;GO:0048455//stamen formation;GO:0009744//response to sucrose stimulus;GO:0043161//proteasomal ubiquitin-dependent protein catabolic process;GO:0006974//response to DNA damage stimulus;GO:0009651//response to salt stress;GO:0048767//root hair elongation;GO:0010029//regulation of seed germination;GO:0010150//leaf senescence;GO:0009555//pollen development;GO…	GO:0001653//peptide receptor activity	GO:0016020//membrane;GO:0005829//cytosol;GO:0008540//proteasome regulatory particle, base subcomplex
CL511.Contig3_All	1435	GO:0051788//response to misfolded protein;GO:0048455//stamen formation;GO:0009744//response to sucrose stimulus;GO:0043161//proteasomal ubiquitin-dependent protein catabolic process;GO:0006974//response to DNA damage stimulus;GO:0009651//response to salt stress;GO:0048767//root hair elongation;GO:0010029//regulation of seed germination;GO:0010150//leaf senescence;GO:0009555//pollen development;GO…	GO:0001653//peptide receptor activity	GO:0016020//membrane;GO:0005829//cytosol;GO:0008540//proteasome regulatory particle, base subcomplex
CL5450.Contig2_All	3684	GO:0031348//negative regulation of defense response;GO:0006499//N-terminal protein myristoylation;GO:0009867//jasmonic acid mediated signaling pathway;GO:0009862//systemic acquired resistance, salicylic acid mediated signaling pathway;GO:0010363//regulation of plant-type hypersensitive response;GO:0006612//protein targeting to membrane;GO:0050832//defense response to fungus;GO:0043069//negative r…	GO:0004722//protein serine/threonine phosphatase activity	GO:0005886//plasma membrane;GO:0005634//nucleus
CL5653.Contig4_All	2538	GO:0048364//root development;GO:0010090//trichome morphogenesis	-	GO:0005737//cytoplasm;GO:0015630//microtubule cytoskeleton
CL5653.Contig5_All	2345	GO:0048364//root development;GO:0010090//trichome morphogenesis	-	GO:0015630//microtubule cytoskeleton
CL5653.Contig7_All	1195	GO:0048364//root development;GO:0010090//trichome morphogenesis	-	GO:0005737//cytoplasm;GO:0015630//microtubule cytoskeleton
CL573.Contig10_All	3130	GO:0048364//root development;GO:0006828//manganese ion transport;GO:0055071//manganese ion homeostasis;GO:0006816//calcium ion transport	GO:0005388//calcium-transporting ATPase activity;GO:0015410//manganese-transporting ATPase activity;GO:0046872//metal ion binding;GO:0005524//ATP binding	GO:0016021//integral to membrane;GO:0012505//endomembrane system;GO:0005794//Golgi apparatus
CL573.Contig11_All	3329	GO:0048364//root development;GO:0006891//intra-Golgi vesicle-mediated transport;GO:0006944//cellular membrane fusion;GO:0006816//calcium ion transport;GO:0006754//ATP biosynthetic process;GO:0055071//manganese ion homeostasis;GO:0006828//manganese ion transport	GO:0015410//manganese-transporting ATPase activity;GO:0046872//metal ion binding;GO:0005388//calcium-transporting ATPase activity;GO:0005516//calmodulin binding;GO:0005524//ATP binding	GO:0005802//trans-Golgi network;GO:0016021//integral to membrane;GO:0005794//Golgi apparatus;GO:0005768//endosome;GO:0012505//endomembrane system;GO:0005634//nucleus
CL573.Contig12_All	4648	GO:0048364//root development;GO:0006891//intra-Golgi vesicle-mediated transport;GO:0006944//cellular membrane fusion;GO:0006816//calcium ion transport;GO:0006754//ATP biosynthetic process;GO:0055071//manganese ion homeostasis;GO:0006828//manganese ion transport	GO:0015410//manganese-transporting ATPase activity;GO:0046872//metal ion binding;GO:0005388//calcium-transporting ATPase activity;GO:0005516//calmodulin binding;GO:0005524//ATP binding	GO:0005802//trans-Golgi network;GO:0016021//integral to membrane;GO:0005794//Golgi apparatus;GO:0005768//endosome;GO:0012505//endomembrane system;GO:0005634//nucleus
CL573.Contig1_All	4032	GO:0048364//root development;GO:0006891//intra-Golgi vesicle-mediated transport;GO:0006944//cellular membrane fusion;GO:0006816//calcium ion transport;GO:0006754//ATP biosynthetic process;GO:0055071//manganese ion homeostasis;GO:0006828//manganese ion transport	GO:0015410//manganese-transporting ATPase activity;GO:0046872//metal ion binding;GO:0005388//calcium-transporting ATPase activity;GO:0005516//calmodulin binding;GO:0005524//ATP binding	GO:0005802//trans-Golgi network;GO:0016021//integral to membrane;GO:0005794//Golgi apparatus;GO:0005768//endosome;GO:0012505//endomembrane system;GO:0005634//nucleus
CL573.Contig2_All	5199	GO:0048364//root development;GO:0006891//intra-Golgi vesicle-mediated transport;GO:0006944//cellular membrane fusion;GO:0006816//calcium ion transport;GO:0006754//ATP biosynthetic process;GO:0055071//manganese ion homeostasis;GO:0006828//manganese ion transport	GO:0015410//manganese-transporting ATPase activity;GO:0046872//metal ion binding;GO:0005388//calcium-transporting ATPase activity;GO:0005516//calmodulin binding;GO:0005524//ATP binding	GO:0005802//trans-Golgi network;GO:0016021//integral to membrane;GO:0005794//Golgi apparatus;GO:0005768//endosome;GO:0012505//endomembrane system;GO:0005634//nucleus
CL573.Contig3_All	3501	GO:0048364//root development;GO:0006891//intra-Golgi vesicle-mediated transport;GO:0006944//cellular membrane fusion;GO:0006816//calcium ion transport;GO:0006754//ATP biosynthetic process;GO:0055071//manganese ion homeostasis;GO:0006828//manganese ion transport	GO:0015410//manganese-transporting ATPase activity;GO:0046872//metal ion binding;GO:0005388//calcium-transporting ATPase activity;GO:0005516//calmodulin binding;GO:0005524//ATP binding	GO:0005802//trans-Golgi network;GO:0016021//integral to membrane;GO:0005794//Golgi apparatus;GO:0005768//endosome;GO:0012505//endomembrane system;GO:0005634//nucleus
CL573.Contig4_All	2965	GO:0048364//root development;GO:0006891//intra-Golgi vesicle-mediated transport;GO:0006944//cellular membrane fusion;GO:0006816//calcium ion transport;GO:0006754//ATP biosynthetic process;GO:0055071//manganese ion homeostasis;GO:0006828//manganese ion transport	GO:0015410//manganese-transporting ATPase activity;GO:0046872//metal ion binding;GO:0005388//calcium-transporting ATPase activity;GO:0005516//calmodulin binding;GO:0005524//ATP binding	GO:0005802//trans-Golgi network;GO:0016021//integral to membrane;GO:0005794//Golgi apparatus;GO:0005768//endosome;GO:0012505//endomembrane system;GO:0005634//nucleus
CL573.Contig5_All	4617	GO:0048364//root development;GO:0006891//intra-Golgi vesicle-mediated transport;GO:0006944//cellular membrane fusion;GO:0006816//calcium ion transport;GO:0006754//ATP biosynthetic process;GO:0055071//manganese ion homeostasis;GO:0006828//manganese ion transport	GO:0015410//manganese-transporting ATPase activity;GO:0046872//metal ion binding;GO:0005388//calcium-transporting ATPase activity;GO:0005516//calmodulin binding;GO:0005524//ATP binding	GO:0005802//trans-Golgi network;GO:0016021//integral to membrane;GO:0005794//Golgi apparatus;GO:0005768//endosome;GO:0012505//endomembrane system;GO:0005634//nucleus
CL573.Contig6_All	3469	GO:0048364//root development;GO:0006891//intra-Golgi vesicle-mediated transport;GO:0006944//cellular membrane fusion;GO:0006816//calcium ion transport;GO:0006754//ATP biosynthetic process;GO:0055071//manganese ion homeostasis;GO:0006828//manganese ion transport	GO:0015410//manganese-transporting ATPase activity;GO:0046872//metal ion binding;GO:0005388//calcium-transporting ATPase activity;GO:0005516//calmodulin binding;GO:0005524//ATP binding	GO:0005802//trans-Golgi network;GO:0016021//integral to membrane;GO:0005794//Golgi apparatus;GO:0005768//endosome;GO:0012505//endomembrane system;GO:0005634//nucleus
CL573.Contig7_All	4620	GO:0048364//root development;GO:0006891//intra-Golgi vesicle-mediated transport;GO:0006944//cellular membrane fusion;GO:0006816//calcium ion transport;GO:0006754//ATP biosynthetic process;GO:0055071//manganese ion homeostasis;GO:0006828//manganese ion transport	GO:0015410//manganese-transporting ATPase activity;GO:0046872//metal ion binding;GO:0005388//calcium-transporting ATPase activity;GO:0005516//calmodulin binding;GO:0005524//ATP binding	GO:0005802//trans-Golgi network;GO:0016021//integral to membrane;GO:0005794//Golgi apparatus;GO:0005768//endosome;GO:0012505//endomembrane system;GO:0005634//nucleus
CL573.Contig8_All	2592	GO:0048364//root development;GO:0006891//intra-Golgi vesicle-mediated transport;GO:0006944//cellular membrane fusion;GO:0006816//calcium ion transport;GO:0006754//ATP biosynthetic process;GO:0055071//manganese ion homeostasis;GO:0006828//manganese ion transport	GO:0015410//manganese-transporting ATPase activity;GO:0046872//metal ion binding;GO:0005388//calcium-transporting ATPase activity;GO:0005516//calmodulin binding;GO:0005524//ATP binding	GO:0005802//trans-Golgi network;GO:0016021//integral to membrane;GO:0005794//Golgi apparatus;GO:0005768//endosome;GO:0012505//endomembrane system;GO:0005634//nucleus
CL573.Contig9_All	1634	GO:0048364//root development;GO:0006828//manganese ion transport;GO:0055071//manganese ion homeostasis;GO:0006816//calcium ion transport	GO:0005388//calcium-transporting ATPase activity;GO:0015410//manganese-transporting ATPase activity;GO:0046872//metal ion binding;GO:0005524//ATP binding	GO:0016021//integral to membrane;GO:0012505//endomembrane system;GO:0005794//Golgi apparatus
CL5851.Contig1_All	1921	GO:0055085//transmembrane transport;GO:0015786//UDP-glucose transport;GO:0015785//UDP-galactose transport;GO:0080147//root hair cell development;GO:0048527//lateral root development;GO:0008643//carbohydrate transport	GO:0005460//UDP-glucose transmembrane transporter activity;GO:0005459//UDP-galactose transmembrane transporter activity	GO:0016021//integral to membrane;GO:0005794//Golgi apparatus;GO:0005886//plasma membrane
CL5851.Contig2_All	2394	GO:0055085//transmembrane transport;GO:0015786//UDP-glucose transport;GO:0015785//UDP-galactose transport;GO:0080147//root hair cell development;GO:0048527//lateral root development;GO:0008643//carbohydrate transport	GO:0005460//UDP-glucose transmembrane transporter activity;GO:0005459//UDP-galactose transmembrane transporter activity	GO:0016021//integral to membrane;GO:0005794//Golgi apparatus;GO:0005886//plasma membrane
CL5851.Contig3_All	1809	GO:0055085//transmembrane transport;GO:0015786//UDP-glucose transport;GO:0015785//UDP-galactose transport;GO:0080147//root hair cell development;GO:0048527//lateral root development;GO:0008643//carbohydrate transport	GO:0005460//UDP-glucose transmembrane transporter activity;GO:0005459//UDP-galactose transmembrane transporter activity	GO:0016021//integral to membrane;GO:0005794//Golgi apparatus;GO:0005886//plasma membrane
CL6032.Contig3_All	279	GO:0051781//positive regulation of cell division;GO:0010286//heat acclimation;GO:0010311//lateral root formation;GO:0045892//negative regulation of transcription, DNA-dependent;GO:0071365//cellular response to auxin stimulus;GO:0016567//protein ubiquitination;GO:0031146//SCF-dependent proteasomal ubiquitin-dependent protein catabolic process;GO:1901332//negative regulation of lateral root develop…	GO:0005515//protein binding;GO:0004842//ubiquitin-protein ligase activity	GO:0005737//cytoplasm;GO:0019005//SCF ubiquitin ligase complex;GO:0005634//nucleus
CL605.Contig1_All	1598	GO:0010260//organ senescence;GO:0009594//detection of nutrient;GO:0003006//developmental process involved in reproduction;GO:0006007//glucose catabolic process;GO:0010050//vegetative phase change;GO:0046777//protein autophosphorylation;GO:0010182//sugar mediated signaling pathway;GO:0006486//protein glycosylation;GO:0080022//primary root development;GO:0009738//abscisic acid mediated signaling pa…	GO:0005515//protein binding;GO:0004683//calmodulin-dependent protein kinase activity;GO:0004713//protein tyrosine kinase activity;GO:0005524//ATP binding	GO:0000152//nuclear ubiquitin ligase complex;GO:0005737//cytoplasm
CL605.Contig2_All	1487	GO:0010260//organ senescence;GO:0009594//detection of nutrient;GO:0003006//developmental process involved in reproduction;GO:0006007//glucose catabolic process;GO:0010050//vegetative phase change;GO:0010182//sugar mediated signaling pathway;GO:0006468//protein phosphorylation;GO:0006486//protein glycosylation;GO:0080022//primary root development;GO:0009738//abscisic acid mediated signaling pathway	GO:0005515//protein binding;GO:0004683//calmodulin-dependent protein kinase activity;GO:0005524//ATP binding	GO:0000152//nuclear ubiquitin ligase complex
CL605.Contig3_All	2163	GO:0010260//organ senescence;GO:0009594//detection of nutrient;GO:0003006//developmental process involved in reproduction;GO:0006007//glucose catabolic process;GO:0010050//vegetative phase change;GO:0046777//protein autophosphorylation;GO:0010182//sugar mediated signaling pathway;GO:0006486//protein glycosylation;GO:0080022//primary root development;GO:0009738//abscisic acid mediated signaling pa…	GO:0005515//protein binding;GO:0004683//calmodulin-dependent protein kinase activity;GO:0004713//protein tyrosine kinase activity;GO:0005524//ATP binding	GO:0000152//nuclear ubiquitin ligase complex;GO:0005737//cytoplasm
CL605.Contig4_All	989	GO:0010260//organ senescence;GO:0009594//detection of nutrient;GO:0003006//developmental process involved in reproduction;GO:0006007//glucose catabolic process;GO:0010050//vegetative phase change;GO:0010182//sugar mediated signaling pathway;GO:0006468//protein phosphorylation;GO:0006486//protein glycosylation;GO:0080022//primary root development;GO:0009738//abscisic acid mediated signaling pathway	GO:0005515//protein binding;GO:0004674//protein serine/threonine kinase activity;GO:0005524//ATP binding	GO:0000152//nuclear ubiquitin ligase complex
CL605.Contig5_All	1108	GO:0010260//organ senescence;GO:0009594//detection of nutrient;GO:0003006//developmental process involved in reproduction;GO:0006007//glucose catabolic process;GO:0010050//vegetative phase change;GO:0010182//sugar mediated signaling pathway;GO:0006468//protein phosphorylation;GO:0006486//protein glycosylation;GO:0080022//primary root development;GO:0009738//abscisic acid mediated signaling pathway	GO:0005515//protein binding;GO:0004674//protein serine/threonine kinase activity;GO:0005524//ATP binding	GO:0000152//nuclear ubiquitin ligase complex
CL6292.Contig1_All	3166	GO:0040007//growth;GO:0016560//protein import into peroxisome matrix, docking;GO:0048527//lateral root development;GO:0006515//misfolded or incompletely synthesized protein catabolic process	GO:0004176//ATP-dependent peptidase activity;GO:0005524//ATP binding;GO:0004252//serine-type endopeptidase activity	GO:0005782//peroxisomal matrix
CL6292.Contig2_All	646	GO:0040007//growth;GO:0016560//protein import into peroxisome matrix, docking;GO:0048527//lateral root development;GO:0006515//misfolded or incompletely synthesized protein catabolic process	GO:0004176//ATP-dependent peptidase activity;GO:0005524//ATP binding;GO:0004252//serine-type endopeptidase activity	GO:0005782//peroxisomal matrix
CL6292.Contig4_All	223	GO:0040007//growth;GO:0016560//protein import into peroxisome matrix, docking;GO:0006515//misfolded or incompletely synthesized protein catabolic process;GO:0016485//protein processing;GO:0048527//lateral root development;GO:0006200//ATP catabolic process;GO:0038032//termination of G-protein coupled receptor signaling pathway	GO:0004252//serine-type endopeptidase activity;GO:0004176//ATP-dependent peptidase activity;GO:0043565//sequence-specific DNA binding;GO:0005524//ATP binding	GO:0009295//nucleoid;GO:0005782//peroxisomal matrix
CL6292.Contig5_All	3485	GO:0040007//growth;GO:0016560//protein import into peroxisome matrix, docking;GO:0048527//lateral root development;GO:0006515//misfolded or incompletely synthesized protein catabolic process	GO:0004176//ATP-dependent peptidase activity;GO:0005524//ATP binding;GO:0004252//serine-type endopeptidase activity	GO:0005782//peroxisomal matrix
CL6292.Contig6_All	3261	GO:0040007//growth;GO:0016560//protein import into peroxisome matrix, docking;GO:0048527//lateral root development;GO:0006515//misfolded or incompletely synthesized protein catabolic process	GO:0004176//ATP-dependent peptidase activity;GO:0005524//ATP binding;GO:0004252//serine-type endopeptidase activity	GO:0005782//peroxisomal matrix
CL6292.Contig7_All	499	GO:0040007//growth;GO:0016560//protein import into peroxisome matrix, docking;GO:0006515//misfolded or incompletely synthesized protein catabolic process;GO:0016485//protein processing;GO:0048527//lateral root development;GO:0006200//ATP catabolic process;GO:0038032//termination of G-protein coupled receptor signaling pathway	GO:0004252//serine-type endopeptidase activity;GO:0004176//ATP-dependent peptidase activity;GO:0043565//sequence-specific DNA binding;GO:0005524//ATP binding	GO:0009295//nucleoid;GO:0005782//peroxisomal matrix
CL6388.Contig1_All	2965	GO:0035556//intracellular signal transduction;GO:0007205//protein kinase C-activating G-protein coupled receptor signaling pathway;GO:0009611//response to wounding;GO:0009409//response to cold;GO:0048193//Golgi vesicle transport;GO:0048527//lateral root development;GO:0016310//phosphorylation;GO:0048366//leaf development	GO:0004143//diacylglycerol kinase activity	GO:0005634//nucleus
CL6388.Contig2_All	1118	GO:0035556//intracellular signal transduction;GO:0007205//protein kinase C-activating G-protein coupled receptor signaling pathway;GO:0009611//response to wounding;GO:0009409//response to cold;GO:0048193//Golgi vesicle transport;GO:0048527//lateral root development;GO:0016310//phosphorylation;GO:0048366//leaf development	GO:0004143//diacylglycerol kinase activity	GO:0005634//nucleus
CL6388.Contig3_All	2970	GO:0035556//intracellular signal transduction;GO:0007205//protein kinase C-activating G-protein coupled receptor signaling pathway;GO:0009611//response to wounding;GO:0009409//response to cold;GO:0048193//Golgi vesicle transport;GO:0048527//lateral root development;GO:0016310//phosphorylation;GO:0048366//leaf development	GO:0004143//diacylglycerol kinase activity	GO:0005634//nucleus
CL6388.Contig4_All	775	GO:0035556//intracellular signal transduction;GO:0009409//response to cold;GO:0009611//response to wounding;GO:0006944//cellular membrane fusion;GO:0007205//protein kinase C-activating G-protein coupled receptor signaling pathway;GO:0016310//phosphorylation;GO:0048366//leaf development;GO:0048193//Golgi vesicle transport;GO:0048527//lateral root development	GO:0004143//diacylglycerol kinase activity;GO:0005509//calcium ion binding	GO:0005737//cytoplasm;GO:0005634//nucleus
CL6799.Contig1_All	205	GO:0048364//root development;GO:0006355//regulation of transcription, DNA-dependent;GO:0043481//anthocyanin accumulation in tissues in response to UV light	GO:0043565//sequence-specific DNA binding;GO:0003700//sequence-specific DNA binding transcription factor activity;GO:0050692//DBD domain binding	GO:0005634//nucleus
CL6811.Contig2_All	2210	GO:0009788//negative regulation of abscisic acid mediated signaling pathway;GO:0048364//root development;GO:0010048//vernalization response;GO:0090333//regulation of stomatal closure;GO:0071732//cellular response to nitric oxide;GO:0071219//cellular response to molecule of bacterial origin;GO:0070301//cellular response to hydrogen peroxide;GO:0016310//phosphorylation;GO:0043481//anthocyanin accum…	GO:0004871//signal transducer activity;GO:0004673//protein histidine kinase activity	GO:0005773//vacuole;GO:0005886//plasma membrane
CL6811.Contig3_All	2616	GO:0009788//negative regulation of abscisic acid mediated signaling pathway;GO:0048364//root development;GO:0010048//vernalization response;GO:0090333//regulation of stomatal closure;GO:0071732//cellular response to nitric oxide;GO:0071219//cellular response to molecule of bacterial origin;GO:0070301//cellular response to hydrogen peroxide;GO:0016310//phosphorylation;GO:0043481//anthocyanin accum…	GO:0004871//signal transducer activity;GO:0004673//protein histidine kinase activity	GO:0005773//vacuole;GO:0005886//plasma membrane
CL6811.Contig4_All	4202	GO:0009788//negative regulation of abscisic acid mediated signaling pathway;GO:0048364//root development;GO:0010048//vernalization response;GO:0090333//regulation of stomatal closure;GO:0071732//cellular response to nitric oxide;GO:0071219//cellular response to molecule of bacterial origin;GO:0023014//signal transduction by phosphorylation;GO:0070301//cellular response to hydrogen peroxide;GO:000…	GO:0000155//phosphorelay sensor kinase activity;GO:0000156//phosphorelay response regulator activity;GO:0005524//ATP binding	GO:0005773//vacuole;GO:0005886//plasma membrane
CL6826.Contig2_All	1551	GO:0048364//root development;GO:0009624//response to nematode;GO:0061062//regulation of nematode larval development;GO:0046686//response to cadmium ion;GO:0097305//response to alcohol;GO:0048366//leaf development;GO:0009987//cellular process;GO:0033993//response to lipid;GO:0009725//response to hormone stimulus;GO:0048316//seed development	GO:0005515//protein binding	GO:0048046//apoplast;GO:0005773//vacuole;GO:0005794//Golgi apparatus;GO:0005829//cytosol;GO:0009570//chloroplast stroma;GO:0009506//plasmodesma;GO:0005886//plasma membrane;GO:0005634//nucleus
CL7048.Contig1_All	546	GO:0070509//calcium ion import;GO:0007638//mechanosensory behavior;GO:0048528//post-embryonic root development	-	GO:0005887//integral to plasma membrane
CL7048.Contig2_All	2760	GO:0070509//calcium ion import;GO:0007638//mechanosensory behavior;GO:0048528//post-embryonic root development	-	GO:0005887//integral to plasma membrane
CL7048.Contig3_All	2387	GO:0070509//calcium ion import;GO:0007638//mechanosensory behavior;GO:0048528//post-embryonic root development	-	GO:0005887//integral to plasma membrane
CL7048.Contig5_All	2360	GO:0070509//calcium ion import;GO:0007638//mechanosensory behavior;GO:0048528//post-embryonic root development	-	GO:0005887//integral to plasma membrane
CL7048.Contig7_All	3052	GO:0070509//calcium ion import;GO:0007638//mechanosensory behavior;GO:0048528//post-embryonic root development	-	GO:0005887//integral to plasma membrane
CL7063.Contig1_All	1175	GO:0048364//root development;GO:0030307//positive regulation of cell growth;GO:0033043//regulation of organelle organization;GO:0051276//chromosome organization;GO:0048367//shoot system development;GO:0010090//trichome morphogenesis;GO:0042023//DNA endoreduplication;GO:0007126//meiosis	GO:0003690//double-stranded DNA binding	GO:0009330//DNA topoisomerase complex (ATP-hydrolyzing);GO:0005634//nucleus
CL7063.Contig2_All	1773	GO:0048364//root development;GO:0030307//positive regulation of cell growth;GO:0033043//regulation of organelle organization;GO:0051276//chromosome organization;GO:0048367//shoot system development;GO:0010090//trichome morphogenesis;GO:0042023//DNA endoreduplication;GO:0007126//meiosis	GO:0003690//double-stranded DNA binding	GO:0009330//DNA topoisomerase complex (ATP-hydrolyzing);GO:0005634//nucleus
CL7063.Contig3_All	882	GO:0048364//root development;GO:0030307//positive regulation of cell growth;GO:0007127//meiosis I;GO:0010638//positive regulation of organelle organization;GO:0006355//regulation of transcription, DNA-dependent;GO:0051276//chromosome organization;GO:0048367//shoot system development;GO:0010090//trichome morphogenesis;GO:0042023//DNA endoreduplication;GO:0007059//chromosome segregation	GO:0003690//double-stranded DNA binding	GO:0009330//DNA topoisomerase complex (ATP-hydrolyzing);GO:0005634//nucleus
CL7217.Contig1_All	1574	GO:0046777//protein autophosphorylation;GO:0009749//response to glucose stimulus;GO:0048364//root development;GO:0010167//response to nitrate;GO:0007165//signal transduction	GO:0005524//ATP binding;GO:0004713//protein tyrosine kinase activity;GO:0004683//calmodulin-dependent protein kinase activity	GO:0005886//plasma membrane
CL7217.Contig3_All	1606	GO:0046777//protein autophosphorylation;GO:0009749//response to glucose stimulus;GO:0048364//root development;GO:0010167//response to nitrate;GO:0007165//signal transduction	GO:0005524//ATP binding;GO:0004713//protein tyrosine kinase activity;GO:0004683//calmodulin-dependent protein kinase activity	GO:0005886//plasma membrane
CL7217.Contig5_All	1819	GO:0046777//protein autophosphorylation;GO:0009749//response to glucose stimulus;GO:0048364//root development;GO:0010167//response to nitrate;GO:0007165//signal transduction	GO:0005524//ATP binding;GO:0004713//protein tyrosine kinase activity;GO:0004683//calmodulin-dependent protein kinase activity	GO:0005886//plasma membrane
CL727.Contig1_All	3287	GO:0010267//production of ta-siRNAs involved in RNA interference;GO:0006346//methylation-dependent chromatin silencing;GO:0009965//leaf morphogenesis;GO:0048439//flower morphogenesis;GO:0010589//leaf proximal/distal pattern formation;GO:0048765//root hair cell differentiation;GO:0051301//cell division;GO:0006306//DNA methylation;GO:0009926//auxin polar transport;GO:0010072//primary shoot apical m…	GO:0004521//endoribonuclease activity;GO:0035197//siRNA binding;GO:0005515//protein binding;GO:0035198//miRNA binding	GO:0019898//extrinsic to membrane;GO:0005829//cytosol;GO:0005634//nucleus
CL727.Contig5_All	1222	GO:0010267//production of ta-siRNAs involved in RNA interference;GO:0006346//methylation-dependent chromatin silencing;GO:0009965//leaf morphogenesis;GO:0048439//flower morphogenesis;GO:0010589//leaf proximal/distal pattern formation;GO:0048765//root hair cell differentiation;GO:0051301//cell division;GO:0006306//DNA methylation;GO:0009926//auxin polar transport;GO:0010072//primary shoot apical m…	GO:0004521//endoribonuclease activity;GO:0035197//siRNA binding;GO:0005515//protein binding;GO:0035198//miRNA binding	GO:0019898//extrinsic to membrane;GO:0005829//cytosol;GO:0005634//nucleus
CL7406.Contig10_All	1980	GO:0071366//cellular response to indolebutyric acid stimulus;GO:0048364//root development;GO:0006855//drug transmembrane transport;GO:0010359//regulation of anion channel activity;GO:0009926//auxin polar transport;GO:0000041//transition metal ion transport;GO:0006661//phosphatidylinositol biosynthetic process	GO:0003881//CDP-diacylglycerol-inositol 3-phosphatidyltransferase activity;GO:0042626//ATPase activity, coupled to transmembrane movement of substances;GO:0005524//ATP binding	GO:0016023//cytoplasmic membrane-bounded vesicle;GO:0005794//Golgi apparatus;GO:0009506//plasmodesma;GO:0005783//endoplasmic reticulum;GO:0005886//plasma membrane
CL7406.Contig11_All	2473	GO:0071366//cellular response to indolebutyric acid stimulus;GO:0048364//root development;GO:0006855//drug transmembrane transport;GO:0010359//regulation of anion channel activity;GO:0009926//auxin polar transport;GO:0000041//transition metal ion transport;GO:0006661//phosphatidylinositol biosynthetic process	GO:0003881//CDP-diacylglycerol-inositol 3-phosphatidyltransferase activity;GO:0042626//ATPase activity, coupled to transmembrane movement of substances;GO:0005524//ATP binding	GO:0005794//Golgi apparatus;GO:0009506//plasmodesma;GO:0005783//endoplasmic reticulum;GO:0005886//plasma membrane
CL7406.Contig1_All	2639	GO:0071366//cellular response to indolebutyric acid stimulus;GO:0048364//root development;GO:0006855//drug transmembrane transport;GO:0010359//regulation of anion channel activity;GO:0009926//auxin polar transport;GO:0000041//transition metal ion transport;GO:0006661//phosphatidylinositol biosynthetic process	GO:0003881//CDP-diacylglycerol-inositol 3-phosphatidyltransferase activity;GO:0042626//ATPase activity, coupled to transmembrane movement of substances;GO:0005524//ATP binding	GO:0005794//Golgi apparatus;GO:0009506//plasmodesma;GO:0005783//endoplasmic reticulum;GO:0005886//plasma membrane
CL7406.Contig2_All	2161	GO:0071366//cellular response to indolebutyric acid stimulus;GO:0048364//root development;GO:0006855//drug transmembrane transport;GO:0010359//regulation of anion channel activity;GO:0009926//auxin polar transport;GO:0000041//transition metal ion transport;GO:0006661//phosphatidylinositol biosynthetic process	GO:0003881//CDP-diacylglycerol-inositol 3-phosphatidyltransferase activity;GO:0042626//ATPase activity, coupled to transmembrane movement of substances;GO:0005524//ATP binding	GO:0016023//cytoplasmic membrane-bounded vesicle;GO:0005794//Golgi apparatus;GO:0009506//plasmodesma;GO:0005783//endoplasmic reticulum;GO:0005886//plasma membrane
CL7406.Contig3_All	2662	GO:0071366//cellular response to indolebutyric acid stimulus;GO:0048364//root development;GO:0006855//drug transmembrane transport;GO:0010359//regulation of anion channel activity;GO:0009926//auxin polar transport;GO:0000041//transition metal ion transport;GO:0006661//phosphatidylinositol biosynthetic process	GO:0003881//CDP-diacylglycerol-inositol 3-phosphatidyltransferase activity;GO:0042626//ATPase activity, coupled to transmembrane movement of substances;GO:0005524//ATP binding	GO:0005794//Golgi apparatus;GO:0009506//plasmodesma;GO:0005783//endoplasmic reticulum;GO:0005886//plasma membrane
CL7406.Contig4_All	2167	GO:0071366//cellular response to indolebutyric acid stimulus;GO:0048364//root development;GO:0006855//drug transmembrane transport;GO:0010359//regulation of anion channel activity;GO:0009926//auxin polar transport;GO:0000041//transition metal ion transport;GO:0006661//phosphatidylinositol biosynthetic process	GO:0003881//CDP-diacylglycerol-inositol 3-phosphatidyltransferase activity;GO:0042626//ATPase activity, coupled to transmembrane movement of substances;GO:0005524//ATP binding	GO:0016023//cytoplasmic membrane-bounded vesicle;GO:0005794//Golgi apparatus;GO:0009506//plasmodesma;GO:0005783//endoplasmic reticulum;GO:0005886//plasma membrane
CL7406.Contig5_All	2553	GO:0071366//cellular response to indolebutyric acid stimulus;GO:0048364//root development;GO:0006855//drug transmembrane transport;GO:0010359//regulation of anion channel activity;GO:0009926//auxin polar transport;GO:0000041//transition metal ion transport;GO:0006661//phosphatidylinositol biosynthetic process	GO:0003881//CDP-diacylglycerol-inositol 3-phosphatidyltransferase activity;GO:0042626//ATPase activity, coupled to transmembrane movement of substances;GO:0005524//ATP binding	GO:0005794//Golgi apparatus;GO:0009506//plasmodesma;GO:0005783//endoplasmic reticulum;GO:0005886//plasma membrane
CL7406.Contig6_All	2060	GO:0071366//cellular response to indolebutyric acid stimulus;GO:0048364//root development;GO:0006855//drug transmembrane transport;GO:0010359//regulation of anion channel activity;GO:0009926//auxin polar transport;GO:0000041//transition metal ion transport;GO:0006661//phosphatidylinositol biosynthetic process	GO:0003881//CDP-diacylglycerol-inositol 3-phosphatidyltransferase activity;GO:0042626//ATPase activity, coupled to transmembrane movement of substances;GO:0005524//ATP binding	GO:0016023//cytoplasmic membrane-bounded vesicle;GO:0005794//Golgi apparatus;GO:0009506//plasmodesma;GO:0005783//endoplasmic reticulum;GO:0005886//plasma membrane
CL7406.Contig8_All	2047	GO:0071366//cellular response to indolebutyric acid stimulus;GO:0048364//root development;GO:0006855//drug transmembrane transport;GO:0010359//regulation of anion channel activity;GO:0009926//auxin polar transport;GO:0000041//transition metal ion transport;GO:0006661//phosphatidylinositol biosynthetic process	GO:0003881//CDP-diacylglycerol-inositol 3-phosphatidyltransferase activity;GO:0042626//ATPase activity, coupled to transmembrane movement of substances;GO:0005524//ATP binding	GO:0016023//cytoplasmic membrane-bounded vesicle;GO:0005794//Golgi apparatus;GO:0009506//plasmodesma;GO:0005783//endoplasmic reticulum;GO:0005886//plasma membrane
CL7406.Contig9_All	2540	GO:0071366//cellular response to indolebutyric acid stimulus;GO:0048364//root development;GO:0006855//drug transmembrane transport;GO:0010359//regulation of anion channel activity;GO:0009926//auxin polar transport;GO:0000041//transition metal ion transport;GO:0006661//phosphatidylinositol biosynthetic process	GO:0003881//CDP-diacylglycerol-inositol 3-phosphatidyltransferase activity;GO:0042626//ATPase activity, coupled to transmembrane movement of substances;GO:0005524//ATP binding	GO:0005794//Golgi apparatus;GO:0009506//plasmodesma;GO:0005783//endoplasmic reticulum;GO:0005886//plasma membrane
CL765.Contig10_All	4724	GO:0006862//nucleotide transport;GO:0006944//cellular membrane fusion;GO:0010363//regulation of plant-type hypersensitive response;GO:0015802//basic amino acid transport;GO:0048194//Golgi vesicle budding;GO:0015914//phospholipid transport;GO:0006612//protein targeting to membrane;GO:0043069//negative regulation of programmed cell death;GO:0043090//amino acid import;GO:0048367//shoot system develo…	GO:0019829//cation-transporting ATPase activity;GO:0000287//magnesium ion binding;GO:0004012//phospholipid-translocating ATPase activity;GO:0015662//ATPase activity, coupled to transmembrane movement of ions, phosphorylative mechanism;GO:0005524//ATP binding	GO:0005802//trans-Golgi network;GO:0016021//integral to membrane;GO:0005794//Golgi apparatus;GO:0005768//endosome;GO:0005886//plasma membrane
CL765.Contig11_All	2387	GO:0006862//nucleotide transport;GO:0006944//cellular membrane fusion;GO:0010363//regulation of plant-type hypersensitive response;GO:0015802//basic amino acid transport;GO:0048194//Golgi vesicle budding;GO:0015914//phospholipid transport;GO:0006612//protein targeting to membrane;GO:0043069//negative regulation of programmed cell death;GO:0043090//amino acid import;GO:0048367//shoot system develo…	GO:0019829//cation-transporting ATPase activity;GO:0000287//magnesium ion binding;GO:0004012//phospholipid-translocating ATPase activity;GO:0015662//ATPase activity, coupled to transmembrane movement of ions, phosphorylative mechanism;GO:0005524//ATP binding	GO:0005802//trans-Golgi network;GO:0016021//integral to membrane;GO:0005794//Golgi apparatus;GO:0005768//endosome;GO:0005886//plasma membrane
CL765.Contig1_All	586	GO:0006862//nucleotide transport;GO:0006944//cellular membrane fusion;GO:0010363//regulation of plant-type hypersensitive response;GO:0015802//basic amino acid transport;GO:0048194//Golgi vesicle budding;GO:0015914//phospholipid transport;GO:0006612//protein targeting to membrane;GO:0043069//negative regulation of programmed cell death;GO:0043090//amino acid import;GO:0048367//shoot system develo…	GO:0019829//cation-transporting ATPase activity;GO:0000287//magnesium ion binding;GO:0004012//phospholipid-translocating ATPase activity;GO:0015662//ATPase activity, coupled to transmembrane movement of ions, phosphorylative mechanism;GO:0005524//ATP binding	GO:0005802//trans-Golgi network;GO:0016021//integral to membrane;GO:0005794//Golgi apparatus;GO:0005768//endosome;GO:0005886//plasma membrane
CL765.Contig2_All	4155	GO:0006862//nucleotide transport;GO:0006944//cellular membrane fusion;GO:0010363//regulation of plant-type hypersensitive response;GO:0015802//basic amino acid transport;GO:0048194//Golgi vesicle budding;GO:0015914//phospholipid transport;GO:0006612//protein targeting to membrane;GO:0043069//negative regulation of programmed cell death;GO:0043090//amino acid import;GO:0048367//shoot system develo…	GO:0019829//cation-transporting ATPase activity;GO:0000287//magnesium ion binding;GO:0004012//phospholipid-translocating ATPase activity;GO:0015662//ATPase activity, coupled to transmembrane movement of ions, phosphorylative mechanism;GO:0005524//ATP binding	GO:0005802//trans-Golgi network;GO:0016021//integral to membrane;GO:0005794//Golgi apparatus;GO:0005768//endosome;GO:0005886//plasma membrane
CL765.Contig3_All	2443	GO:0006862//nucleotide transport;GO:0006944//cellular membrane fusion;GO:0010363//regulation of plant-type hypersensitive response;GO:0015802//basic amino acid transport;GO:0048194//Golgi vesicle budding;GO:0015914//phospholipid transport;GO:0006612//protein targeting to membrane;GO:0043069//negative regulation of programmed cell death;GO:0043090//amino acid import;GO:0048367//shoot system develo…	GO:0019829//cation-transporting ATPase activity;GO:0000287//magnesium ion binding;GO:0004012//phospholipid-translocating ATPase activity;GO:0015662//ATPase activity, coupled to transmembrane movement of ions, phosphorylative mechanism;GO:0005524//ATP binding	GO:0005802//trans-Golgi network;GO:0016021//integral to membrane;GO:0005794//Golgi apparatus;GO:0005768//endosome;GO:0005886//plasma membrane
CL765.Contig4_All	2664	GO:0006862//nucleotide transport;GO:0006944//cellular membrane fusion;GO:0010363//regulation of plant-type hypersensitive response;GO:0015802//basic amino acid transport;GO:0048194//Golgi vesicle budding;GO:0015914//phospholipid transport;GO:0006612//protein targeting to membrane;GO:0043069//negative regulation of programmed cell death;GO:0043090//amino acid import;GO:0048367//shoot system develo…	GO:0019829//cation-transporting ATPase activity;GO:0000287//magnesium ion binding;GO:0004012//phospholipid-translocating ATPase activity;GO:0015662//ATPase activity, coupled to transmembrane movement of ions, phosphorylative mechanism;GO:0005524//ATP binding	GO:0005802//trans-Golgi network;GO:0016021//integral to membrane;GO:0005794//Golgi apparatus;GO:0005768//endosome;GO:0005886//plasma membrane
CL765.Contig5_All	1207	GO:0006862//nucleotide transport;GO:0006944//cellular membrane fusion;GO:0010363//regulation of plant-type hypersensitive response;GO:0015802//basic amino acid transport;GO:0048194//Golgi vesicle budding;GO:0015914//phospholipid transport;GO:0006612//protein targeting to membrane;GO:0043069//negative regulation of programmed cell death;GO:0043090//amino acid import;GO:0048367//shoot system develo…	GO:0019829//cation-transporting ATPase activity;GO:0000287//magnesium ion binding;GO:0004012//phospholipid-translocating ATPase activity;GO:0015662//ATPase activity, coupled to transmembrane movement of ions, phosphorylative mechanism;GO:0005524//ATP binding	GO:0005802//trans-Golgi network;GO:0016021//integral to membrane;GO:0005794//Golgi apparatus;GO:0005768//endosome;GO:0005886//plasma membrane
CL765.Contig6_All	4101	GO:0006862//nucleotide transport;GO:0006944//cellular membrane fusion;GO:0010363//regulation of plant-type hypersensitive response;GO:0015802//basic amino acid transport;GO:0048194//Golgi vesicle budding;GO:0015914//phospholipid transport;GO:0006612//protein targeting to membrane;GO:0043069//negative regulation of programmed cell death;GO:0043090//amino acid import;GO:0048367//shoot system develo…	GO:0019829//cation-transporting ATPase activity;GO:0000287//magnesium ion binding;GO:0004012//phospholipid-translocating ATPase activity;GO:0015662//ATPase activity, coupled to transmembrane movement of ions, phosphorylative mechanism;GO:0005524//ATP binding	GO:0005802//trans-Golgi network;GO:0016021//integral to membrane;GO:0005794//Golgi apparatus;GO:0005768//endosome;GO:0005886//plasma membrane
CL765.Contig7_All	4685	GO:0006862//nucleotide transport;GO:0006944//cellular membrane fusion;GO:0010363//regulation of plant-type hypersensitive response;GO:0015802//basic amino acid transport;GO:0048194//Golgi vesicle budding;GO:0015914//phospholipid transport;GO:0006612//protein targeting to membrane;GO:0043069//negative regulation of programmed cell death;GO:0043090//amino acid import;GO:0048367//shoot system develo…	GO:0019829//cation-transporting ATPase activity;GO:0000287//magnesium ion binding;GO:0004012//phospholipid-translocating ATPase activity;GO:0015662//ATPase activity, coupled to transmembrane movement of ions, phosphorylative mechanism;GO:0005524//ATP binding	GO:0005802//trans-Golgi network;GO:0016021//integral to membrane;GO:0005794//Golgi apparatus;GO:0005768//endosome;GO:0005886//plasma membrane
CL765.Contig8_All	4614	GO:0006862//nucleotide transport;GO:0006944//cellular membrane fusion;GO:0010363//regulation of plant-type hypersensitive response;GO:0015802//basic amino acid transport;GO:0048194//Golgi vesicle budding;GO:0015914//phospholipid transport;GO:0006612//protein targeting to membrane;GO:0043069//negative regulation of programmed cell death;GO:0043090//amino acid import;GO:0048367//shoot system develo…	GO:0019829//cation-transporting ATPase activity;GO:0000287//magnesium ion binding;GO:0004012//phospholipid-translocating ATPase activity;GO:0015662//ATPase activity, coupled to transmembrane movement of ions, phosphorylative mechanism;GO:0005524//ATP binding	GO:0005802//trans-Golgi network;GO:0016021//integral to membrane;GO:0005794//Golgi apparatus;GO:0005768//endosome;GO:0005886//plasma membrane
CL765.Contig9_All	4126	GO:0006862//nucleotide transport;GO:0006944//cellular membrane fusion;GO:0010363//regulation of plant-type hypersensitive response;GO:0015802//basic amino acid transport;GO:0048194//Golgi vesicle budding;GO:0015914//phospholipid transport;GO:0006612//protein targeting to membrane;GO:0043069//negative regulation of programmed cell death;GO:0043090//amino acid import;GO:0048367//shoot system develo…	GO:0019829//cation-transporting ATPase activity;GO:0000287//magnesium ion binding;GO:0004012//phospholipid-translocating ATPase activity;GO:0015662//ATPase activity, coupled to transmembrane movement of ions, phosphorylative mechanism;GO:0005524//ATP binding	GO:0005802//trans-Golgi network;GO:0016021//integral to membrane;GO:0005794//Golgi apparatus;GO:0005768//endosome;GO:0005886//plasma membrane
CL777.Contig8_All	2113	GO:0048364//root development;GO:0006351//transcription, DNA-dependent;GO:0060771//phyllotactic patterning;GO:0010033//response to organic substance;GO:0040019//positive regulation of embryonic development;GO:0009845//seed germination;GO:0009628//response to abiotic stimulus;GO:0009887//organ morphogenesis;GO:0050794//regulation of cellular process;GO:1901700;GO:0048316//seed development	-	GO:0005634//nucleus
CL7809.Contig1_All	820	GO:0048364//root development;GO:0009407//toxin catabolic process;GO:0009624//response to nematode;GO:0061062//regulation of nematode larval development;GO:0009742//brassinosteroid mediated signaling pathway;GO:0048366//leaf development;GO:0006626//protein targeting to mitochondrion	GO:0005524//ATP binding;GO:0045309//protein phosphorylated amino acid binding	GO:0005773//vacuole;GO:0009507//chloroplast;GO:0005618//cell wall;GO:0005794//Golgi apparatus;GO:0005829//cytosol;GO:0005635//nuclear envelope;GO:0009506//plasmodesma;GO:0005886//plasma membrane;GO:0005739//mitochondrion
CL7809.Contig2_All	422	GO:0048364//root development;GO:0006355//regulation of transcription, DNA-dependent;GO:0009624//response to nematode;GO:0061062//regulation of nematode larval development;GO:0009742//brassinosteroid mediated signaling pathway;GO:0048366//leaf development;GO:0006626//protein targeting to mitochondrion	GO:0016818//hydrolase activity, acting on acid anhydrides, in phosphorus-containing anhydrides;GO:0019904//protein domain specific binding;GO:0005524//ATP binding;GO:0045309//protein phosphorylated amino acid binding	GO:0005773//vacuole;GO:0009507//chloroplast;GO:0005618//cell wall;GO:0005794//Golgi apparatus;GO:0005829//cytosol;GO:0005635//nuclear envelope;GO:0009506//plasmodesma;GO:0005886//plasma membrane;GO:0005739//mitochondrion
CL7809.Contig3_All	558	GO:0048364//root development;GO:0006310//DNA recombination;GO:0006355//regulation of transcription, DNA-dependent;GO:0009407//toxin catabolic process;GO:0009624//response to nematode;GO:0061062//regulation of nematode larval development;GO:0009742//brassinosteroid mediated signaling pathway;GO:0048366//leaf development;GO:0006626//protein targeting to mitochondrion;GO:0006281//DNA repair	GO:0016818//hydrolase activity, acting on acid anhydrides, in phosphorus-containing anhydrides;GO:0003676//nucleic acid binding;GO:0016788//hydrolase activity, acting on ester bonds;GO:0005524//ATP binding;GO:0045309//protein phosphorylated amino acid binding	GO:0005773//vacuole;GO:0009507//chloroplast;GO:0005618//cell wall;GO:0005794//Golgi apparatus;GO:0005829//cytosol;GO:0005635//nuclear envelope;GO:0009506//plasmodesma;GO:0005886//plasma membrane;GO:0005739//mitochondrion
CL7809.Contig4_All	352	GO:0048364//root development;GO:0006974//response to DNA damage stimulus;GO:0009407//toxin catabolic process;GO:0009624//response to nematode;GO:0006259//DNA metabolic process;GO:0061062//regulation of nematode larval development;GO:0009742//brassinosteroid mediated signaling pathway;GO:0048366//leaf development;GO:0006626//protein targeting to mitochondrion	GO:0016787//hydrolase activity;GO:0005524//ATP binding;GO:0045309//protein phosphorylated amino acid binding	GO:0005773//vacuole;GO:0009507//chloroplast;GO:0005618//cell wall;GO:0005794//Golgi apparatus;GO:0005829//cytosol;GO:0005635//nuclear envelope;GO:0009506//plasmodesma;GO:0005886//plasma membrane;GO:0005739//mitochondrion
CL7872.Contig1_All	2414	GO:0006468//protein phosphorylation;GO:0048364//root development;GO:0009850//auxin metabolic process;GO:0009741//response to brassinosteroid stimulus;GO:0009826//unidimensional cell growth	GO:0004674//protein serine/threonine kinase activity;GO:0005524//ATP binding	-
CL7872.Contig2_All	2512	GO:0006468//protein phosphorylation;GO:0048364//root development;GO:0009850//auxin metabolic process;GO:0009741//response to brassinosteroid stimulus;GO:0009826//unidimensional cell growth	GO:0004674//protein serine/threonine kinase activity;GO:0005524//ATP binding	-
CL7872.Contig3_All	2877	GO:0006468//protein phosphorylation;GO:0048364//root development;GO:0009850//auxin metabolic process;GO:0009741//response to brassinosteroid stimulus;GO:0009826//unidimensional cell growth	GO:0004674//protein serine/threonine kinase activity;GO:0005524//ATP binding	-
CL7872.Contig4_All	2780	GO:0006468//protein phosphorylation;GO:0048364//root development;GO:0009850//auxin metabolic process;GO:0009741//response to brassinosteroid stimulus;GO:0009826//unidimensional cell growth	GO:0004674//protein serine/threonine kinase activity;GO:0005524//ATP binding	-
CL7872.Contig5_All	253	GO:0006468//protein phosphorylation;GO:0048364//root development;GO:0009850//auxin metabolic process;GO:0009741//response to brassinosteroid stimulus;GO:0009826//unidimensional cell growth	GO:0004674//protein serine/threonine kinase activity;GO:0004712//protein serine/threonine/tyrosine kinase activity;GO:0005524//ATP binding	GO:0005737//cytoplasm;GO:0005634//nucleus
CL805.Contig2_All	332	GO:0055085//transmembrane transport;GO:0010338//leaf formation;GO:0048830//adventitious root development;GO:0010358//leaf shaping;GO:0009926//auxin polar transport;GO:0009908//flower development;GO:0010051//xylem and phloem pattern formation;GO:0010229//inflorescence development;GO:0009630//gravitropism;GO:0048826//cotyledon morphogenesis	GO:0005215//transporter activity	GO:0009925//basal plasma membrane;GO:0016021//integral to membrane;GO:0009921;GO:0005737//cytoplasm;GO:0045177//apical part of cell
CL8171.Contig2_All	7086	GO:0048364//root development;GO:0009926//auxin polar transport;GO:0010305//leaf vascular tissue pattern formation;GO:0019827//stem cell maintenance;GO:0001708//cell fate specification;GO:0009790//embryo development	-	GO:0005634//nucleus
CL8179.Contig1_All	1712	GO:0009910//negative regulation of flower development;GO:0048364//root development;GO:0048507//meristem development;GO:0009640//photomorphogenesis;GO:0010305//leaf vascular tissue pattern formation;GO:0008152//metabolic process;GO:0009790//embryo development	GO:0008238//exopeptidase activity;GO:0016491//oxidoreductase activity	-
CL8179.Contig3_All	2155	GO:0009910//negative regulation of flower development;GO:0048364//root development;GO:0048507//meristem development;GO:0009640//photomorphogenesis;GO:0010305//leaf vascular tissue pattern formation;GO:0006508//proteolysis;GO:0009790//embryo development	GO:0004180//carboxypeptidase activity;GO:0016491//oxidoreductase activity;GO:0016805//dipeptidase activity	GO:0005886//plasma membrane
CL8179.Contig5_All	1454	GO:0009910//negative regulation of flower development;GO:0048364//root development;GO:0048507//meristem development;GO:0009640//photomorphogenesis;GO:0010305//leaf vascular tissue pattern formation;GO:0006508//proteolysis;GO:0009790//embryo development	GO:0004180//carboxypeptidase activity;GO:0016491//oxidoreductase activity;GO:0016805//dipeptidase activity	GO:0005886//plasma membrane
CL8179.Contig7_All	2468	GO:0009910//negative regulation of flower development;GO:0048364//root development;GO:0048507//meristem development;GO:0009640//photomorphogenesis;GO:0010305//leaf vascular tissue pattern formation;GO:0006508//proteolysis;GO:0009790//embryo development	GO:0004180//carboxypeptidase activity;GO:0016491//oxidoreductase activity;GO:0016805//dipeptidase activity	GO:0005886//plasma membrane
CL8179.Contig8_All	2484	GO:0009910//negative regulation of flower development;GO:0048364//root development;GO:0048507//meristem development;GO:0009640//photomorphogenesis;GO:0010305//leaf vascular tissue pattern formation;GO:0006508//proteolysis;GO:0009790//embryo development	GO:0004180//carboxypeptidase activity;GO:0016491//oxidoreductase activity;GO:0016805//dipeptidase activity	GO:0005886//plasma membrane
CL8686.Contig1_All	1503	GO:0046855//inositol phosphate dephosphorylation;GO:0009627//systemic acquired resistance;GO:0048193//Golgi vesicle transport;GO:0048527//lateral root development;GO:0032957//inositol trisphosphate metabolic process;GO:0009697//salicylic acid biosynthetic process	GO:0016791//phosphatase activity	-
CL8686.Contig2_All	2425	GO:0046855//inositol phosphate dephosphorylation;GO:0009697//salicylic acid biosynthetic process;GO:0043407//negative regulation of MAP kinase activity;GO:0032957//inositol trisphosphate metabolic process;GO:0048193//Golgi vesicle transport;GO:0048527//lateral root development;GO:0009627//systemic acquired resistance	GO:0004438//phosphatidylinositol-3-phosphatase activity;GO:0052629//phosphatidylinositol-3,5-bisphosphate 3-phosphatase activity	GO:0005634//nucleus
CL8686.Contig3_All	3430	GO:0046855//inositol phosphate dephosphorylation;GO:0009697//salicylic acid biosynthetic process;GO:0043407//negative regulation of MAP kinase activity;GO:0032957//inositol trisphosphate metabolic process;GO:0035335//peptidyl-tyrosine dephosphorylation;GO:0048193//Golgi vesicle transport;GO:0048527//lateral root development;GO:0009627//systemic acquired resistance	GO:0004725//protein tyrosine phosphatase activity;GO:0004438//phosphatidylinositol-3-phosphatase activity;GO:0052629//phosphatidylinositol-3,5-bisphosphate 3-phosphatase activity	GO:0009536//plastid;GO:0005634//nucleus
CL8790.Contig1_All	2338	GO:0006281//DNA repair;GO:0010224//response to UV-B;GO:0048364//root development;GO:0000956//nuclear-transcribed mRNA catabolic process;GO:0008284//positive regulation of cell proliferation	-	GO:0005634//nucleus
CL8790.Contig2_All	2351	GO:0006281//DNA repair;GO:0010224//response to UV-B;GO:0048364//root development;GO:0000956//nuclear-transcribed mRNA catabolic process;GO:0008284//positive regulation of cell proliferation	-	GO:0005634//nucleus
CL9602.Contig1_All	1678	GO:0048519//negative regulation of biological process;GO:0046777//protein autophosphorylation;GO:0048364//root development;GO:0009887//organ morphogenesis;GO:0010051//xylem and phloem pattern formation;GO:0007018//microtubule-based movement;GO:0048439//flower morphogenesis;GO:0009855//determination of bilateral symmetry;GO:0048544//recognition of pollen	GO:0003777//microtubule motor activity;GO:0031625//ubiquitin protein ligase binding;GO:0005524//ATP binding;GO:0004675//transmembrane receptor protein serine/threonine kinase activity;GO:0030246//carbohydrate binding	GO:0005875//microtubule associated complex;GO:0005874//microtubule;GO:0009506//plasmodesma;GO:0009574//preprophase band;GO:0005773//vacuole;GO:0005886//plasma membrane
CL9602.Contig2_All	3099	GO:0048519//negative regulation of biological process;GO:0046777//protein autophosphorylation;GO:0048364//root development;GO:0009887//organ morphogenesis;GO:0010051//xylem and phloem pattern formation;GO:0007018//microtubule-based movement;GO:0048439//flower morphogenesis;GO:0009855//determination of bilateral symmetry;GO:0048544//recognition of pollen	GO:0003777//microtubule motor activity;GO:0031625//ubiquitin protein ligase binding;GO:0005524//ATP binding;GO:0004675//transmembrane receptor protein serine/threonine kinase activity;GO:0030246//carbohydrate binding	GO:0005875//microtubule associated complex;GO:0005874//microtubule;GO:0009506//plasmodesma;GO:0009574//preprophase band;GO:0005773//vacuole;GO:0005886//plasma membrane
CL9602.Contig3_All	3314	GO:0048519//negative regulation of biological process;GO:0046777//protein autophosphorylation;GO:0048364//root development;GO:0009887//organ morphogenesis;GO:0010051//xylem and phloem pattern formation;GO:0007018//microtubule-based movement;GO:0048439//flower morphogenesis;GO:0009855//determination of bilateral symmetry;GO:0048544//recognition of pollen	GO:0003777//microtubule motor activity;GO:0031625//ubiquitin protein ligase binding;GO:0005524//ATP binding;GO:0004675//transmembrane receptor protein serine/threonine kinase activity;GO:0030246//carbohydrate binding	GO:0005875//microtubule associated complex;GO:0005874//microtubule;GO:0009506//plasmodesma;GO:0009574//preprophase band;GO:0005773//vacuole;GO:0005886//plasma membrane
CL9602.Contig4_All	3451	GO:0048519//negative regulation of biological process;GO:0046777//protein autophosphorylation;GO:0048364//root development;GO:0009887//organ morphogenesis;GO:0010051//xylem and phloem pattern formation;GO:0007018//microtubule-based movement;GO:0048439//flower morphogenesis;GO:0009855//determination of bilateral symmetry;GO:0048544//recognition of pollen	GO:0003777//microtubule motor activity;GO:0031625//ubiquitin protein ligase binding;GO:0005524//ATP binding;GO:0004675//transmembrane receptor protein serine/threonine kinase activity;GO:0030246//carbohydrate binding	GO:0005875//microtubule associated complex;GO:0005874//microtubule;GO:0009506//plasmodesma;GO:0009574//preprophase band;GO:0005773//vacuole;GO:0005886//plasma membrane
CL9687.Contig1_All	1075	GO:0048364//root development;GO:0006045//N-acetylglucosamine biosynthetic process;GO:0006048//UDP-N-acetylglucosamine biosynthetic process	GO:0004343//glucosamine 6-phosphate N-acetyltransferase activity	GO:0005789//endoplasmic reticulum membrane
CL9687.Contig2_All	1132	GO:0048364//root development;GO:0006045//N-acetylglucosamine biosynthetic process;GO:0006048//UDP-N-acetylglucosamine biosynthetic process	GO:0004343//glucosamine 6-phosphate N-acetyltransferase activity	GO:0005789//endoplasmic reticulum membrane
CL9687.Contig3_All	1309	GO:0048364//root development;GO:0006045//N-acetylglucosamine biosynthetic process;GO:0006048//UDP-N-acetylglucosamine biosynthetic process	GO:0004343//glucosamine 6-phosphate N-acetyltransferase activity	GO:0005789//endoplasmic reticulum membrane
CL9777.Contig1_All	1276	GO:0001510//RNA methylation;GO:0016049//cell growth;GO:0009651//response to salt stress;GO:0051301//cell division;GO:0009733//response to auxin stimulus;GO:0007005//mitochondrion organization;GO:0048527//lateral root development;GO:0071731//response to nitric oxide	-	GO:0005747//mitochondrial respiratory chain complex I;GO:0005730//nucleolus;GO:0009505//plant-type cell wall;GO:0005774//vacuolar membrane;GO:0009507//chloroplast;GO:0005794//Golgi apparatus;GO:0005886//plasma membrane
CL9777.Contig2_All	1245	GO:0001510//RNA methylation;GO:0016049//cell growth;GO:0009651//response to salt stress;GO:0051301//cell division;GO:0009733//response to auxin stimulus;GO:0007005//mitochondrion organization;GO:0048527//lateral root development;GO:0071731//response to nitric oxide	-	GO:0005747//mitochondrial respiratory chain complex I;GO:0005730//nucleolus;GO:0009505//plant-type cell wall;GO:0005774//vacuolar membrane;GO:0009507//chloroplast;GO:0005794//Golgi apparatus;GO:0005886//plasma membrane
CL9813.Contig3_All	1164	GO:0010103//stomatal complex morphogenesis;GO:0000394//RNA splicing, via endonucleolytic cleavage and ligation;GO:0009734//auxin mediated signaling pathway;GO:0048573//photoperiodism, flowering;GO:0009086//methionine biosynthetic process;GO:0010152//pollen maturation;GO:0071249//cellular response to nitrate;GO:0048527//lateral root development;GO:0016567//protein ubiquitination;GO:0080022//primar…	GO:0004842//ubiquitin-protein ligase activity;GO:0000822//inositol hexakisphosphate binding;GO:0010011//auxin binding	GO:0005774//vacuolar membrane;GO:0019005//SCF ubiquitin ligase complex;GO:0005634//nucleus
CL9972.Contig1_All	1104	GO:0055085//transmembrane transport;GO:0048316//seed development;GO:0048364//root development;GO:0048367//shoot system development;GO:0051503//adenine nucleotide transport	GO:0005471//ATP:ADP antiporter activity	GO:0016021//integral to membrane;GO:0005743//mitochondrial inner membrane;GO:0005789//endoplasmic reticulum membrane
CL9972.Contig2_All	596	GO:0055085//transmembrane transport;GO:0048316//seed development;GO:0048364//root development;GO:0048367//shoot system development;GO:0051503//adenine nucleotide transport	GO:0005471//ATP:ADP antiporter activity	GO:0016021//integral to membrane;GO:0005743//mitochondrial inner membrane;GO:0005789//endoplasmic reticulum membrane
Unigene1112_All	1653	GO:0009753//response to jasmonic acid stimulus;GO:0055114//oxidation-reduction process;GO:0048364//root development;GO:0009611//response to wounding;GO:0009737//response to abscisic acid stimulus;GO:0009816//defense response to bacterium, incompatible interaction;GO:0031408//oxylipin biosynthetic process	GO:0016165//lipoxygenase activity;GO:0005506//iron ion binding	GO:0009507//chloroplast
Unigene1118_All	4134	GO:0048364//root development;GO:0016117//carotenoid biosynthetic process;GO:0009944//polarity specification of adaxial/abaxial axis;GO:0009910//negative regulation of flower development;GO:0009965//leaf morphogenesis;GO:0035281//pre-miRNA export from nucleus;GO:0010236//plastoquinone biosynthetic process	GO:0004161//dimethylallyltranstransferase activity;GO:0005515//protein binding;GO:0010357//homogentisate solanesyltransferase activity;GO:0010356//homogentisate geranylgeranyltransferase activity;GO:0005487//nucleocytoplasmic transporter activity;GO:0010355//homogentisate farnesyltransferase activity	GO:0009941//chloroplast envelope;GO:0005635//nuclear envelope;GO:0005739//mitochondrion
Unigene11509_All	1050	GO:0048768//root hair cell tip growth;GO:0042742//defense response to bacterium;GO:0001558//regulation of cell growth;GO:0009860//pollen tube growth;GO:0010252//auxin homeostasis;GO:0048527//lateral root development;GO:0008283//cell proliferation;GO:0046686//response to cadmium ion;GO:0040014//regulation of multicellular organism growth;GO:0007346//regulation of mitotic cell cycle;GO:0009790//emb…	-	GO:0009579//thylakoid;GO:0009507//chloroplast;GO:0090406//pollen tube;GO:0005634//nucleus;GO:0005886//plasma membrane;GO:0048046//apoplast
Unigene11746_All	826	GO:0048364//root development;GO:0030154//cell differentiation;GO:0009653//anatomical structure morphogenesis	-	-
Unigene11935_All	624	GO:0048364//root development;GO:0006417//regulation of translation;GO:0009880//embryonic pattern specification;GO:0006355//regulation of transcription, DNA-dependent;GO:0010051//xylem and phloem pattern formation;GO:0009734//auxin mediated signaling pathway	GO:0046983//protein dimerization activity	GO:0005634//nucleus
Unigene11973_All	914	GO:0071366//cellular response to indolebutyric acid stimulus;GO:0048364//root development;GO:0009926//auxin polar transport;GO:0006200//ATP catabolic process	GO:0005215//transporter activity;GO:0016887//ATPase activity;GO:0005524//ATP binding	GO:0005886//plasma membrane
Unigene13151_All	3261	GO:0009753//response to jasmonic acid stimulus;GO:0055114//oxidation-reduction process;GO:0048364//root development;GO:0009611//response to wounding;GO:0009737//response to abscisic acid stimulus;GO:0009816//defense response to bacterium, incompatible interaction;GO:0031408//oxylipin biosynthetic process	GO:0016165//lipoxygenase activity;GO:0005506//iron ion binding	GO:0009507//chloroplast
Unigene13607_All	2825	GO:0005975//carbohydrate metabolic process;GO:0048364//root development;GO:0006520//cellular amino acid metabolic process	GO:0004575//sucrose alpha-glucosidase activity;GO:0033926	GO:0005886//plasma membrane;GO:0005634//nucleus;GO:0005829//cytosol
Unigene13609_All	2295	GO:0005975//carbohydrate metabolic process;GO:0048364//root development;GO:0006520//cellular amino acid metabolic process	GO:0004575//sucrose alpha-glucosidase activity;GO:0033926	GO:0005886//plasma membrane;GO:0005634//nucleus;GO:0005829//cytosol
Unigene14356_All	1900	GO:0000278//mitotic cell cycle;GO:0048364//root development;GO:0009880//embryonic pattern specification;GO:0009749//response to glucose stimulus;GO:0050826//response to freezing;GO:0009755//hormone-mediated signaling pathway;GO:0048825//cotyledon development;GO:0050832//defense response to fungus;GO:0051301//cell division;GO:0042742//defense response to bacterium;GO:0045892//negative regulation o…	GO:0005515//protein binding;GO:0000166//nucleotide binding;GO:0016905//myosin heavy chain kinase activity	GO:0080008//Cul4-RING ubiquitin ligase complex;GO:0005634//nucleus
Unigene14427_All	1474	GO:0048364//root development;GO:0006887//exocytosis;GO:0009791//post-embryonic development	-	GO:0000145//exocyst;GO:0043227//membrane-bounded organelle;GO:0016020//membrane
Unigene14446_All	1283	GO:0048364//root development;GO:0016117//carotenoid biosynthetic process;GO:0009944//polarity specification of adaxial/abaxial axis;GO:0010189//vitamin E biosynthetic process;GO:0009910//negative regulation of flower development;GO:0009965//leaf morphogenesis;GO:0035281//pre-miRNA export from nucleus;GO:0010236//plastoquinone biosynthetic process	GO:0004161//dimethylallyltranstransferase activity;GO:0005515//protein binding;GO:0010357//homogentisate solanesyltransferase activity;GO:0010356//homogentisate geranylgeranyltransferase activity;GO:0005487//nucleocytoplasmic transporter activity;GO:0010355//homogentisate farnesyltransferase activity	GO:0009941//chloroplast envelope;GO:0016021//integral to membrane;GO:0005635//nuclear envelope;GO:0009535//chloroplast thylakoid membrane;GO:0005739//mitochondrion
Unigene14811_All	2045	GO:0006457//protein folding;GO:0048364//root development;GO:0000413//protein peptidyl-prolyl isomerization	GO:0003755//peptidyl-prolyl cis-trans isomerase activity	GO:0005771//multivesicular body;GO:0005795//Golgi stack;GO:0016023//cytoplasmic membrane-bounded vesicle;GO:0005886//plasma membrane;GO:0009507//chloroplast;GO:0005829//cytosol;GO:0005783//endoplasmic reticulum;GO:0005739//mitochondrion
Unigene14838_All	894	GO:0009845//seed germination;GO:0009867//jasmonic acid mediated signaling pathway;GO:0010154//fruit development;GO:0009887//organ morphogenesis;GO:0030968//endoplasmic reticulum unfolded protein response;GO:0009817//defense response to fungus, incompatible interaction;GO:0048527//lateral root development;GO:0016573//histone acetylation;GO:0009723//response to ethylene stimulus;GO:0007186//G-prote…	GO:0004402//histone acetyltransferase activity	GO:0080008//Cul4-RING ubiquitin ligase complex;GO:0005783//endoplasmic reticulum;GO:0005886//plasma membrane
Unigene15107_All	1475	GO:0016567//protein ubiquitination;GO:0048364//root development;GO:0051301//cell division	GO:0004842//ubiquitin-protein ligase activity;GO:0050662//coenzyme binding;GO:0008270//zinc ion binding;GO:0000166//nucleotide binding	GO:0005886//plasma membrane;GO:0016021//integral to membrane;GO:0005739//mitochondrion
Unigene15883_All	822	GO:0006457//protein folding;GO:0030968//endoplasmic reticulum unfolded protein response;GO:0048193//Golgi vesicle transport;GO:0048527//lateral root development	GO:0031072//heat shock protein binding;GO:0051082//unfolded protein binding	GO:0005794//Golgi apparatus
Unigene15981_All	709	GO:0035434//copper ion transmembrane transport;GO:0048364//root development;GO:0048235//pollen sperm cell differentiation	GO:0005375//copper ion transmembrane transporter activity	GO:0031224//intrinsic to membrane
Unigene16218_All	2259	GO:0043622//cortical microtubule organization;GO:0009664//plant-type cell wall organization;GO:0008283//cell proliferation;GO:0007020//microtubule nucleation;GO:0005982//starch metabolic process;GO:0030244//cellulose biosynthetic process;GO:0048193//Golgi vesicle transport;GO:0051322//anaphase;GO:0051302//regulation of cell division;GO:0001578//microtubule bundle formation;GO:0019344//cysteine bi…	GO:0046983//protein dimerization activity;GO:0008017//microtubule binding	GO:0072686//mitotic spindle;GO:0009524//phragmoplast;GO:0005829//cytosol;GO:0009574//preprophase band;GO:0005634//nucleus;GO:0010005//cortical microtubule, transverse to long axis
Unigene16702_All	436	GO:0031348//negative regulation of defense response;GO:0016036//cellular response to phosphate starvation;GO:0019375//galactolipid biosynthetic process;GO:0006995//cellular response to nitrogen starvation;GO:0009867//jasmonic acid mediated signaling pathway;GO:0009862//systemic acquired resistance, salicylic acid mediated signaling pathway;GO:0010363//regulation of plant-type hypersensitive respo…	GO:0004630//phospholipase D activity;GO:0032440//2-alkenal reductase [NAD(P)] activity;GO:0005543//phospholipid binding;GO:0070290//NAPE-specific phospholipase D activity	GO:0005773//vacuole
Unigene17071_All	266	GO:0048364//root development;GO:0019287//isopentenyl diphosphate biosynthetic process, mevalonate pathway;GO:0019288//isopentenyl diphosphate biosynthetic process, mevalonate-independent pathway;GO:0016125//sterol metabolic process;GO:0050790//regulation of catalytic activity	GO:0034046//poly(G) RNA binding	GO:0005739//mitochondrion
Unigene18180_All	1866	GO:0009910//negative regulation of flower development;GO:0048364//root development;GO:0048507//meristem development;GO:0009640//photomorphogenesis;GO:0010305//leaf vascular tissue pattern formation;GO:0006508//proteolysis;GO:0009790//embryo development	GO:0004180//carboxypeptidase activity;GO:0016491//oxidoreductase activity;GO:0016805//dipeptidase activity	GO:0005886//plasma membrane
Unigene18817_All	2049	GO:0051707//response to other organism;GO:0055114//oxidation-reduction process;GO:0048364//root development;GO:0009611//response to wounding;GO:0031408//oxylipin biosynthetic process	GO:0016165//lipoxygenase activity;GO:0005506//iron ion binding	GO:0009507//chloroplast
Unigene19177_All	769	GO:0055085//transmembrane transport;GO:0010338//leaf formation;GO:0048364//root development;GO:0010358//leaf shaping;GO:0009926//auxin polar transport;GO:0009908//flower development;GO:0010051//xylem and phloem pattern formation;GO:0010229//inflorescence development;GO:0009630//gravitropism;GO:0048826//cotyledon morphogenesis	-	GO:0009925//basal plasma membrane;GO:0016021//integral to membrane;GO:0005737//cytoplasm;GO:0045177//apical part of cell
Unigene19554_All	2210	GO:0043622//cortical microtubule organization;GO:0009664//plant-type cell wall organization;GO:0008283//cell proliferation;GO:0007020//microtubule nucleation;GO:0005982//starch metabolic process;GO:0030244//cellulose biosynthetic process;GO:0048193//Golgi vesicle transport;GO:0051322//anaphase;GO:0051302//regulation of cell division;GO:0001578//microtubule bundle formation;GO:0019344//cysteine bi…	GO:0046983//protein dimerization activity;GO:0008017//microtubule binding	GO:0072686//mitotic spindle;GO:0009524//phragmoplast;GO:0005829//cytosol;GO:0009574//preprophase band;GO:0005634//nucleus;GO:0010005//cortical microtubule, transverse to long axis
Unigene20107_All	2401	GO:0006491//N-glycan processing;GO:0048364//root development;GO:0043090//amino acid import;GO:0006888//ER to Golgi vesicle-mediated transport	GO:0005509//calcium ion binding;GO:0004571//mannosyl-oligosaccharide 1,2-alpha-mannosidase activity	GO:0005768//endosome;GO:0005802//trans-Golgi network;GO:0016020//membrane;GO:0005794//Golgi apparatus
Unigene20956_All	1853	GO:0006355//regulation of transcription, DNA-dependent;GO:0000041//transition metal ion transport;GO:0048589//developmental growth;GO:0015698//inorganic anion transport;GO:0048527//lateral root development;GO:0048765//root hair cell differentiation	GO:0046983//protein dimerization activity;GO:0003700//sequence-specific DNA binding transcription factor activity	GO:0005634//nucleus
Unigene21110_All	265	GO:0035434//copper ion transmembrane transport;GO:0048364//root development;GO:0048235//pollen sperm cell differentiation	GO:0051119//sugar transmembrane transporter activity;GO:0043621//protein self-association;GO:0005375//copper ion transmembrane transporter activity	GO:0005773//vacuole;GO:0005887//integral to plasma membrane
Unigene22017_All	1026	GO:0006457//protein folding;GO:0048364//root development;GO:0000413//protein peptidyl-prolyl isomerization	GO:0003755//peptidyl-prolyl cis-trans isomerase activity	GO:0005771//multivesicular body;GO:0005795//Golgi stack;GO:0016023//cytoplasmic membrane-bounded vesicle;GO:0005886//plasma membrane;GO:0009507//chloroplast;GO:0005829//cytosol;GO:0005783//endoplasmic reticulum;GO:0005739//mitochondrion
Unigene22810_All	1429	GO:0009653//anatomical structure morphogenesis;GO:0048364//root development;GO:0071705;GO:0006820//anion transport;GO:0071702;GO:0048869//cellular developmental process;GO:0016043//cellular component organization;GO:0046907//intracellular transport	-	GO:0016020//membrane;GO:0043231//intracellular membrane-bounded organelle;GO:0005737//cytoplasm
Unigene23398_All	1014	GO:0048281//inflorescence morphogenesis;GO:0009987//cellular process;GO:0050896//response to stimulus;GO:0048364//root development	-	-
Unigene23796_All	740	GO:0080022//primary root development;GO:0010103//stomatal complex morphogenesis;GO:0071249//cellular response to nitrate;GO:0048443//stamen development;GO:0002237//response to molecule of bacterial origin;GO:0010152//pollen maturation;GO:0048527//lateral root development;GO:0009734//auxin mediated signaling pathway	GO:0000822//inositol hexakisphosphate binding;GO:0010011//auxin binding;GO:0004842//ubiquitin-protein ligase activity	GO:0005774//vacuolar membrane;GO:0005634//nucleus;GO:0005886//plasma membrane
Unigene24505_All	2207	GO:0009749//response to glucose stimulus;GO:0009958//positive gravitropism;GO:0048364//root development;GO:0009926//auxin polar transport;GO:0009640//photomorphogenesis;GO:0009637//response to blue light;GO:0008361//regulation of cell size;GO:0043481//anthocyanin accumulation in tissues in response to UV light;GO:0048443//stamen development;GO:0046685//response to arsenic-containing substance;GO:…	GO:0010329//auxin efflux transmembrane transporter activity;GO:0009672//auxin:hydrogen symporter activity	GO:0009925//basal plasma membrane;GO:0000323//lytic vacuole;GO:0016023//cytoplasmic membrane-bounded vesicle
Unigene25392_All	2125	GO:0009414//response to water deprivation;GO:0009873//ethylene mediated signaling pathway;GO:0006355//regulation of transcription, DNA-dependent;GO:0042742//defense response to bacterium;GO:0010143//cutin biosynthetic process;GO:0006526//arginine biosynthetic process;GO:0080022//primary root development;GO:0048481//ovule development;GO:0010166//wax metabolic process;GO:0044419//interspecies inter…	GO:0003992//N2-acetyl-L-ornithine:2-oxoglutarate 5-aminotransferase activity;GO:0043565//sequence-specific DNA binding;GO:0030170//pyridoxal phosphate binding;GO:0003700//sequence-specific DNA binding transcription factor activity;GO:0005507//copper ion binding	GO:0009570//chloroplast stroma;GO:0005634//nucleus;GO:0005739//mitochondrion
Unigene2570_All	926	GO:0006457//protein folding;GO:0048364//root development;GO:0000413//protein peptidyl-prolyl isomerization	GO:0003755//peptidyl-prolyl cis-trans isomerase activity	GO:0005771//multivesicular body;GO:0005795//Golgi stack;GO:0016023//cytoplasmic membrane-bounded vesicle;GO:0005886//plasma membrane;GO:0009507//chloroplast;GO:0005829//cytosol;GO:0005783//endoplasmic reticulum;GO:0005739//mitochondrion
Unigene26516_All	1682	GO:0048569//post-embryonic organ development;GO:0048364//root development;GO:0009791//post-embryonic development;GO:0009734//auxin mediated signaling pathway	GO:0000822//inositol hexakisphosphate binding;GO:0010011//auxin binding	GO:0019005//SCF ubiquitin ligase complex
Unigene2688_All	525	GO:0009793//embryo development ending in seed dormancy;GO:0048468//cell development;GO:0010051//xylem and phloem pattern formation;GO:0048364//root development;GO:0016246//RNA interference;GO:0010817//regulation of hormone levels;GO:0048507//meristem development;GO:0010016//shoot system morphogenesis;GO:0010033//response to organic substance;GO:0045087//innate immune response;GO:0016070//RNA meta…	GO:0003723//RNA binding	GO:0005737//cytoplasm
Unigene26942_All	1140	GO:0048768//root hair cell tip growth;GO:0042742//defense response to bacterium;GO:0001558//regulation of cell growth;GO:0009860//pollen tube growth;GO:0010252//auxin homeostasis;GO:0048527//lateral root development;GO:0008283//cell proliferation;GO:0046686//response to cadmium ion;GO:0040014//regulation of multicellular organism growth;GO:0007346//regulation of mitotic cell cycle;GO:0009790//emb…	-	GO:0009579//thylakoid;GO:0009507//chloroplast;GO:0090406//pollen tube;GO:0005634//nucleus;GO:0005886//plasma membrane;GO:0048046//apoplast
Unigene26952_All	316	GO:0006655//phosphatidylglycerol biosynthetic process;GO:0007638//mechanosensory behavior;GO:0070509//calcium ion import;GO:0007020//microtubule nucleation;GO:0019344//cysteine biosynthetic process;GO:0048528//post-embryonic root development;GO:0007231//osmosensory signaling pathway;GO:0033500//carbohydrate homeostasis	-	GO:0005887//integral to plasma membrane
Unigene28042_All	505	GO:0048364//root development;GO:0006417//regulation of translation;GO:0009880//embryonic pattern specification;GO:0006355//regulation of transcription, DNA-dependent;GO:0010051//xylem and phloem pattern formation;GO:0009734//auxin mediated signaling pathway	GO:0046983//protein dimerization activity	GO:0005634//nucleus
Unigene28199_All	1074	GO:0048364//root development;GO:0016567//protein ubiquitination	GO:0004842//ubiquitin-protein ligase activity	-
Unigene28538_All	599	GO:0009845//seed germination;GO:0009867//jasmonic acid mediated signaling pathway;GO:0010154//fruit development;GO:0009887//organ morphogenesis;GO:0030968//endoplasmic reticulum unfolded protein response;GO:0009817//defense response to fungus, incompatible interaction;GO:0048527//lateral root development;GO:0016573//histone acetylation;GO:0009723//response to ethylene stimulus;GO:0007186//G-prote…	GO:0004402//histone acetyltransferase activity	GO:0080008//Cul4-RING ubiquitin ligase complex;GO:0005783//endoplasmic reticulum;GO:0005886//plasma membrane
Unigene28866_All	1983	GO:0048527//lateral root development;GO:0015706//nitrate transport;GO:0055085//transmembrane transport;GO:0010167//response to nitrate	-	GO:0016021//integral to membrane
Unigene29083_All	254	GO:0080022//primary root development;GO:0071249//cellular response to nitrate;GO:0048443//stamen development;GO:0002237//response to molecule of bacterial origin;GO:0010152//pollen maturation;GO:0048527//lateral root development;GO:0009734//auxin mediated signaling pathway	GO:0000822//inositol hexakisphosphate binding;GO:0010011//auxin binding	GO:0005886//plasma membrane
Unigene29165_All	2416	GO:0080022//primary root development;GO:0010468//regulation of gene expression;GO:0010492//maintenance of shoot apical meristem identity;GO:0010071//root meristem specification;GO:0010078//maintenance of root meristem identity	GO:0008270//zinc ion binding	GO:0009536//plastid;GO:0005634//nucleus
Unigene29507_All	2262	GO:0009753//response to jasmonic acid stimulus;GO:0055114//oxidation-reduction process;GO:0048364//root development;GO:0009611//response to wounding;GO:0009737//response to abscisic acid stimulus;GO:0009816//defense response to bacterium, incompatible interaction;GO:0031408//oxylipin biosynthetic process	GO:0016165//lipoxygenase activity;GO:0005506//iron ion binding	GO:0009507//chloroplast
Unigene29727_All	527	GO:0048364//root development;GO:0009735//response to cytokinin stimulus;GO:0006355//regulation of transcription, DNA-dependent;GO:0010016//shoot system morphogenesis;GO:0009826//unidimensional cell growth;GO:0009641//shade avoidance;GO:0010218//response to far red light;GO:0008283//cell proliferation;GO:0009734//auxin mediated signaling pathway;GO:0010017//red or far-red light signaling pathway	GO:0003700//sequence-specific DNA binding transcription factor activity;GO:0042803//protein homodimerization activity;GO:0000976//transcription regulatory region sequence-specific DNA binding	GO:0005634//nucleus
Unigene31500_All	333	GO:0048527//lateral root development;GO:0009737//response to abscisic acid stimulus;GO:0009734//auxin mediated signaling pathway;GO:0009736//cytokinin mediated signaling pathway	GO:0042802//identical protein binding	GO:0005634//nucleus
Unigene31903_All	1565	GO:0048527//lateral root development;GO:0009734//auxin mediated signaling pathway	GO:0000822//inositol hexakisphosphate binding	GO:0019005//SCF ubiquitin ligase complex;GO:0005634//nucleus
Unigene33730_All	431	GO:0048364//root development;GO:0006355//regulation of transcription, DNA-dependent;GO:0008361//regulation of cell size;GO:1900056//negative regulation of leaf senescence;GO:0031347//regulation of defense response	-	GO:0005634//nucleus
Unigene34125_All	266	GO:0080056//petal vascular tissue pattern formation;GO:0048364//root development;GO:0010305//leaf vascular tissue pattern formation;GO:0000478//endonucleolytic cleavage involved in rRNA processing;GO:0048366//leaf development;GO:0010588//cotyledon vascular tissue pattern formation;GO:0080057//sepal vascular tissue pattern formation	GO:0003723//RNA binding;GO:0000166//nucleotide binding	GO:0005730//nucleolus
Unigene34558_All	1318	GO:0046939//nucleotide phosphorylation;GO:0048364//root development;GO:0048367//shoot system development;GO:0008652//cellular amino acid biosynthetic process	GO:0004017//adenylate kinase activity;GO:0005524//ATP binding	GO:0005739//mitochondrion;GO:0009570//chloroplast stroma;GO:0005634//nucleus
Unigene35709_All	206	GO:0048364//root development;GO:0006355//regulation of transcription, DNA-dependent;GO:0009913//epidermal cell differentiation;GO:0043481//anthocyanin accumulation in tissues in response to UV light	GO:0043565//sequence-specific DNA binding;GO:0003700//sequence-specific DNA binding transcription factor activity	GO:0005634//nucleus
Unigene36814_All	847	GO:0048364//root development;GO:0030154//cell differentiation;GO:0009653//anatomical structure morphogenesis	-	-
Unigene37688_All	1445	GO:0009987//cellular process;GO:0050896//response to stimulus;GO:0009888//tissue development;GO:0048364//root development;GO:0009908//flower development;GO:0065007//biological regulation;GO:0008152//metabolic process;GO:0009793//embryo development ending in seed dormancy	GO:0003824//catalytic activity	-
Unigene380_All	3112	GO:0048364//root development;GO:0006828//manganese ion transport;GO:0055071//manganese ion homeostasis;GO:0006816//calcium ion transport	GO:0005388//calcium-transporting ATPase activity;GO:0015410//manganese-transporting ATPase activity;GO:0046872//metal ion binding;GO:0005524//ATP binding	GO:0016021//integral to membrane;GO:0012505//endomembrane system;GO:0005794//Golgi apparatus
Unigene38206_All	412	GO:0046686//response to cadmium ion;GO:0048367//shoot system development;GO:0048364//root development	-	GO:0005730//nucleolus;GO:0022626//cytosolic ribosome;GO:0009507//chloroplast
Unigene3953_All	486	GO:0048364//root development;GO:0042542//response to hydrogen peroxide;GO:0009864//induced systemic resistance, jasmonic acid mediated signaling pathway;GO:0010120//camalexin biosynthetic process;GO:0009651//response to salt stress;GO:2000038//regulation of stomatal complex development;GO:0051301//cell division;GO:0006468//protein phosphorylation;GO:0000165//MAPK cascade;GO:0009409//response to c…	GO:0004707//MAP kinase activity;GO:0005524//ATP binding	GO:0005802//trans-Golgi network;GO:0009524//phragmoplast;GO:0009574//preprophase band
Unigene39797_All	569	GO:0009958//positive gravitropism;GO:0048364//root development;GO:0009638//phototropism;GO:0048573//photoperiodism, flowering;GO:0006508//proteolysis;GO:0009415//response to water stimulus	GO:0008236//serine-type peptidase activity	GO:0019866//organelle inner membrane;GO:0016023//cytoplasmic membrane-bounded vesicle;GO:0005773//vacuole;GO:0005783//endoplasmic reticulum;GO:0005634//nucleus;GO:0005886//plasma membrane;GO:0048046//apoplast
Unigene40142_All	3013	GO:0009753//response to jasmonic acid stimulus;GO:0055114//oxidation-reduction process;GO:0048364//root development;GO:0009611//response to wounding;GO:0009737//response to abscisic acid stimulus;GO:0009816//defense response to bacterium, incompatible interaction;GO:0031408//oxylipin biosynthetic process	GO:0016165//lipoxygenase activity;GO:0005506//iron ion binding	GO:0009507//chloroplast
Unigene40573_All	2014	GO:0006413//translational initiation;GO:0009850//auxin metabolic process;GO:0048830//adventitious root development;GO:0009616//virus induced gene silencing;GO:0009965//leaf morphogenesis;GO:0009733//response to auxin stimulus;GO:0010218//response to far red light;GO:0009793//embryo development ending in seed dormancy;GO:0035195//gene silencing by miRNA;GO:0016246//RNA interference	GO:0003743//translation initiation factor activity;GO:0035198//miRNA binding;GO:0004521//endoribonuclease activity;GO:0035197//siRNA binding	GO:0005829//cytosol;GO:0005634//nucleus
Unigene40576_All	1518	GO:0009850//auxin metabolic process;GO:0048830//adventitious root development;GO:0009616//virus induced gene silencing;GO:0009965//leaf morphogenesis;GO:0009733//response to auxin stimulus;GO:0010218//response to far red light;GO:0009793//embryo development ending in seed dormancy;GO:0035195//gene silencing by miRNA;GO:0016246//RNA interference	GO:0035198//miRNA binding;GO:0004521//endoribonuclease activity;GO:0035197//siRNA binding	GO:0005829//cytosol;GO:0005634//nucleus
Unigene40577_All	1289	GO:0006413//translational initiation;GO:0009850//auxin metabolic process;GO:0048830//adventitious root development;GO:0009616//virus induced gene silencing;GO:0009965//leaf morphogenesis;GO:0009733//response to auxin stimulus;GO:0010218//response to far red light;GO:0009793//embryo development ending in seed dormancy;GO:0035195//gene silencing by miRNA;GO:0016246//RNA interference	GO:0003743//translation initiation factor activity;GO:0035198//miRNA binding;GO:0004521//endoribonuclease activity;GO:0035197//siRNA binding	GO:0005829//cytosol;GO:0005634//nucleus
Unigene40578_All	1368	GO:0006413//translational initiation;GO:0009850//auxin metabolic process;GO:0048830//adventitious root development;GO:0009616//virus induced gene silencing;GO:0009965//leaf morphogenesis;GO:0009733//response to auxin stimulus;GO:0010218//response to far red light;GO:0009793//embryo development ending in seed dormancy;GO:0035195//gene silencing by miRNA;GO:0016246//RNA interference	GO:0003743//translation initiation factor activity;GO:0035198//miRNA binding;GO:0004521//endoribonuclease activity;GO:0035197//siRNA binding	GO:0005829//cytosol;GO:0005634//nucleus
Unigene40625_All	1130	GO:0010440//stomatal lineage progression;GO:0055114//oxidation-reduction process;GO:0006355//regulation of transcription, DNA-dependent;GO:0007584//response to nutrient;GO:0048527//lateral root development;GO:0048578//positive regulation of long-day photoperiodism, flowering	GO:0003677//DNA binding;GO:0046983//protein dimerization activity;GO:0003700//sequence-specific DNA binding transcription factor activity;GO:0032440//2-alkenal reductase [NAD(P)] activity;GO:0008134//transcription factor binding	GO:0005634//nucleus
Unigene40634_All	3589	GO:0048497//maintenance of floral organ identity;GO:0045492//xylan biosynthetic process;GO:0006944//cellular membrane fusion;GO:0009691//cytokinin biosynthetic process;GO:0006355//regulation of transcription, DNA-dependent;GO:0010440//stomatal lineage progression;GO:0048578//positive regulation of long-day photoperiodism, flowering;GO:0048527//lateral root development;GO:0009556//microsporogenesi…	GO:0032440//2-alkenal reductase [NAD(P)] activity;GO:0046983//protein dimerization activity;GO:0003677//DNA binding;GO:0003700//sequence-specific DNA binding transcription factor activity;GO:0008134//transcription factor binding	GO:0005634//nucleus
Unigene40673_All	2985	GO:2000069//regulation of post-embryonic root development;GO:0009750//response to fructose stimulus;GO:0009744//response to sucrose stimulus;GO:0046777//protein autophosphorylation;GO:0048510//regulation of timing of transition from vegetative to reproductive phase;GO:0010182//sugar mediated signaling pathway;GO:0000165//MAPK cascade;GO:0010105//negative regulation of ethylene mediated signaling …	GO:0005515//protein binding;GO:0004712//protein serine/threonine/tyrosine kinase activity;GO:0004674//protein serine/threonine kinase activity	GO:0005789//endoplasmic reticulum membrane;GO:0005634//nucleus
Unigene40675_All	3372	GO:2000069//regulation of post-embryonic root development;GO:0009750//response to fructose stimulus;GO:0009744//response to sucrose stimulus;GO:0046777//protein autophosphorylation;GO:0048510//regulation of timing of transition from vegetative to reproductive phase;GO:0010182//sugar mediated signaling pathway;GO:0010105//negative regulation of ethylene mediated signaling pathway;GO:0009686//gibbe…	GO:0005515//protein binding;GO:0004674//protein serine/threonine kinase activity	GO:0005789//endoplasmic reticulum membrane
Unigene40676_All	3425	GO:2000069//regulation of post-embryonic root development;GO:0009750//response to fructose stimulus;GO:0009744//response to sucrose stimulus;GO:0046777//protein autophosphorylation;GO:0048510//regulation of timing of transition from vegetative to reproductive phase;GO:0010182//sugar mediated signaling pathway;GO:0010105//negative regulation of ethylene mediated signaling pathway;GO:0009686//gibbe…	GO:0005515//protein binding;GO:0004674//protein serine/threonine kinase activity	GO:0005789//endoplasmic reticulum membrane
Unigene40678_All	3349	GO:2000069//regulation of post-embryonic root development;GO:0009750//response to fructose stimulus;GO:0009744//response to sucrose stimulus;GO:0046777//protein autophosphorylation;GO:0048510//regulation of timing of transition from vegetative to reproductive phase;GO:0010182//sugar mediated signaling pathway;GO:0000165//MAPK cascade;GO:0010105//negative regulation of ethylene mediated signaling …	GO:0005515//protein binding;GO:0004712//protein serine/threonine/tyrosine kinase activity;GO:0004674//protein serine/threonine kinase activity	GO:0005789//endoplasmic reticulum membrane;GO:0005634//nucleus
Unigene40735_All	3208	GO:0048569//post-embryonic organ development;GO:0048364//root development;GO:0009791//post-embryonic development;GO:0009734//auxin mediated signaling pathway	GO:0000822//inositol hexakisphosphate binding	GO:0000151//ubiquitin ligase complex
Unigene40737_All	3775	GO:0048569//post-embryonic organ development;GO:0048364//root development;GO:0009791//post-embryonic development;GO:0009734//auxin mediated signaling pathway	GO:0000822//inositol hexakisphosphate binding	GO:0000151//ubiquitin ligase complex
Unigene40738_All	2310	GO:0048527//lateral root development;GO:0009734//auxin mediated signaling pathway	GO:0000822//inositol hexakisphosphate binding	GO:0019005//SCF ubiquitin ligase complex;GO:0005634//nucleus
Unigene40741_All	2248	GO:0048569//post-embryonic organ development;GO:0048364//root development;GO:0009791//post-embryonic development;GO:0009734//auxin mediated signaling pathway	GO:0000822//inositol hexakisphosphate binding;GO:0010011//auxin binding	GO:0019005//SCF ubiquitin ligase complex
Unigene41103_All	1324	GO:0048589//developmental growth;GO:0010106//cellular response to iron ion starvation;GO:0015706//nitrate transport;GO:0006826//iron ion transport;GO:0048527//lateral root development;GO:0048765//root hair cell differentiation;GO:0010167//response to nitrate;GO:0010087//phloem or xylem histogenesis;GO:0016132//brassinosteroid biosynthetic process	GO:0003996//acyl-CoA ligase activity;GO:0016746//transferase activity, transferring acyl groups	GO:0005783//endoplasmic reticulum;GO:0005634//nucleus
Unigene41416_All	1630	GO:0009749//response to glucose stimulus;GO:0009958//positive gravitropism;GO:0048364//root development;GO:0009926//auxin polar transport;GO:0009640//photomorphogenesis;GO:0009637//response to blue light;GO:0009733//response to auxin stimulus;GO:0008361//regulation of cell size;GO:0043481//anthocyanin accumulation in tissues in response to UV light;GO:0048443//stamen development;GO:0046685//respo…	GO:0010329//auxin efflux transmembrane transporter activity	GO:0009925//basal plasma membrane;GO:0000323//lytic vacuole;GO:0016023//cytoplasmic membrane-bounded vesicle
Unigene42037_All	618	GO:0048281//inflorescence morphogenesis;GO:0009987//cellular process;GO:0050896//response to stimulus;GO:0048364//root development	-	-
Unigene42501_All	655	GO:0046686//response to cadmium ion;GO:0016310//phosphorylation;GO:0048367//shoot system development;GO:0048364//root development	GO:0016301//kinase activity	GO:0005730//nucleolus;GO:0022626//cytosolic ribosome;GO:0009507//chloroplast
Unigene42648_All	3938	GO:0048364//root development;GO:0009735//response to cytokinin stimulus;GO:0010072//primary shoot apical meristem specification;GO:0030497//fatty acid elongation	GO:0003989//acetyl-CoA carboxylase activity;GO:0046872//metal ion binding;GO:0005524//ATP binding;GO:0004075//biotin carboxylase activity	GO:0005886//plasma membrane
Unigene42692_All	761	GO:0009753//response to jasmonic acid stimulus;GO:0055114//oxidation-reduction process;GO:0048364//root development;GO:0009611//response to wounding;GO:0009737//response to abscisic acid stimulus;GO:0009816//defense response to bacterium, incompatible interaction;GO:0031408//oxylipin biosynthetic process	GO:0016165//lipoxygenase activity;GO:0005506//iron ion binding	GO:0009507//chloroplast
Unigene42693_All	928	GO:0051707//response to other organism;GO:0055114//oxidation-reduction process;GO:0048364//root development;GO:0009611//response to wounding;GO:0031408//oxylipin biosynthetic process	GO:0016165//lipoxygenase activity;GO:0005506//iron ion binding	GO:0009507//chloroplast
Unigene42807_All	2644	GO:0006862//nucleotide transport;GO:0030243//cellulose metabolic process;GO:0006944//cellular membrane fusion;GO:0010363//regulation of plant-type hypersensitive response;GO:0015802//basic amino acid transport;GO:0006612//protein targeting to membrane;GO:0043069//negative regulation of programmed cell death;GO:0043090//amino acid import;GO:0030036//actin cytoskeleton organization;GO:0015696//ammo…	GO:0005525//GTP binding;GO:0016817//hydrolase activity, acting on acid anhydrides	GO:0005774//vacuolar membrane;GO:0016021//integral to membrane;GO:0005789//endoplasmic reticulum membrane;GO:0005886//plasma membrane;GO:0005634//nucleus
Unigene43098_All	1166	GO:0009414//response to water deprivation;GO:0006944//cellular membrane fusion;GO:0007034//vacuolar transport;GO:0009958//positive gravitropism;GO:0010200//response to chitin;GO:0006355//regulation of transcription, DNA-dependent;GO:0009407//toxin catabolic process;GO:0009753//response to jasmonic acid stimulus;GO:0015031//protein transport;GO:0042538//hyperosmotic salinity response;GO:0007264//s…	GO:0005515//protein binding;GO:0005525//GTP binding;GO:0043565//sequence-specific DNA binding;GO:0003700//sequence-specific DNA binding transcription factor activity	GO:0005774//vacuolar membrane;GO:0005769//early endosome;GO:0005783//endoplasmic reticulum;GO:0005886//plasma membrane;GO:0005634//nucleus
Unigene43179_All	1340	GO:0009555//pollen development;GO:0048658//tapetal layer development;GO:0080144//amino acid homeostasis;GO:0080022//primary root development;GO:0006006//glucose metabolic process;GO:0055114//oxidation-reduction process	GO:0051287//NAD binding;GO:0005507//copper ion binding;GO:0050661//NADP binding;GO:0004365//glyceraldehyde-3-phosphate dehydrogenase (NAD+) (phosphorylating) activity;GO:0008270//zinc ion binding	GO:0016020//membrane
Unigene44118_All	205	GO:0005975//carbohydrate metabolic process;GO:0048364//root development;GO:0006520//cellular amino acid metabolic process	GO:0004575//sucrose alpha-glucosidase activity;GO:0033926	GO:0005886//plasma membrane;GO:0005634//nucleus;GO:0005829//cytosol
Unigene4463_All	4397	GO:0071366//cellular response to indolebutyric acid stimulus;GO:0048364//root development;GO:0009926//auxin polar transport;GO:0006200//ATP catabolic process	GO:0015416//organic phosphonate transmembrane-transporting ATPase activity;GO:0005524//ATP binding	GO:0005886//plasma membrane
Unigene45648_All	1711	GO:0009753//response to jasmonic acid stimulus;GO:0055114//oxidation-reduction process;GO:0048364//root development;GO:0009611//response to wounding;GO:0009737//response to abscisic acid stimulus;GO:0009816//defense response to bacterium, incompatible interaction;GO:0031408//oxylipin biosynthetic process	GO:0016165//lipoxygenase activity;GO:0005506//iron ion binding	-
Unigene45649_All	1608	GO:0009753//response to jasmonic acid stimulus;GO:0055114//oxidation-reduction process;GO:0048364//root development;GO:0009611//response to wounding;GO:0009737//response to abscisic acid stimulus;GO:0009816//defense response to bacterium, incompatible interaction;GO:0031408//oxylipin biosynthetic process	GO:0016165//lipoxygenase activity;GO:0005506//iron ion binding	-
Unigene45650_All	1185	GO:0051707//response to other organism;GO:0055114//oxidation-reduction process;GO:0048364//root development;GO:0009611//response to wounding;GO:0031408//oxylipin biosynthetic process	GO:0016165//lipoxygenase activity;GO:0005506//iron ion binding	GO:0009507//chloroplast
Unigene45651_All	1288	GO:0051707//response to other organism;GO:0055114//oxidation-reduction process;GO:0048364//root development;GO:0009611//response to wounding;GO:0031408//oxylipin biosynthetic process	GO:0016165//lipoxygenase activity;GO:0005506//iron ion binding	GO:0009507//chloroplast
Unigene45652_All	1637	GO:0051707//response to other organism;GO:0055114//oxidation-reduction process;GO:0048364//root development;GO:0009611//response to wounding;GO:0031408//oxylipin biosynthetic process	GO:0016165//lipoxygenase activity;GO:0005506//iron ion binding	GO:0009507//chloroplast
Unigene4609_All	2402	GO:0006655//phosphatidylglycerol biosynthetic process;GO:0007638//mechanosensory behavior;GO:0070509//calcium ion import;GO:0007020//microtubule nucleation;GO:0019344//cysteine biosynthetic process;GO:0048528//post-embryonic root development;GO:0007231//osmosensory signaling pathway;GO:0033500//carbohydrate homeostasis	-	GO:0005887//integral to plasma membrane
Unigene47697_All	200	GO:0055114//oxidation-reduction process;GO:0048364//root development;GO:0006355//regulation of transcription, DNA-dependent;GO:0010228//vegetative to reproductive phase transition of meristem	GO:0003677//DNA binding;GO:0046983//protein dimerization activity;GO:0003700//sequence-specific DNA binding transcription factor activity;GO:0032440//2-alkenal reductase [NAD(P)] activity	GO:0005634//nucleus
Unigene48178_All	200	GO:0048364//root development;GO:0019287//isopentenyl diphosphate biosynthetic process, mevalonate pathway;GO:0019288//isopentenyl diphosphate biosynthetic process, mevalonate-independent pathway;GO:0016125//sterol metabolic process;GO:0050790//regulation of catalytic activity	GO:0034046//poly(G) RNA binding	GO:0005739//mitochondrion
Unigene49049_All	511	GO:0070509//calcium ion import;GO:0007638//mechanosensory behavior;GO:0048528//post-embryonic root development	-	GO:0005887//integral to plasma membrane
Unigene49085_All	1163	GO:0048364//root development;GO:0030154//cell differentiation;GO:0009653//anatomical structure morphogenesis	GO:0003824//catalytic activity	-
Unigene49086_All	1148	GO:0048364//root development;GO:0030154//cell differentiation;GO:0009653//anatomical structure morphogenesis	-	-
Unigene4970_All	2153	GO:0005975//carbohydrate metabolic process;GO:0048364//root development;GO:0006520//cellular amino acid metabolic process	GO:0004575//sucrose alpha-glucosidase activity;GO:0033926	GO:0005886//plasma membrane;GO:0005634//nucleus;GO:0005829//cytosol
Unigene49718_All	1026	GO:0055114//oxidation-reduction process;GO:0080022//primary root development;GO:0048658//tapetal layer development;GO:0080144//amino acid homeostasis;GO:0009555//pollen development;GO:0006006//glucose metabolic process	GO:0051287//NAD binding;GO:0005507//copper ion binding;GO:0008270//zinc ion binding;GO:0004365//glyceraldehyde-3-phosphate dehydrogenase (NAD+) (phosphorylating) activity;GO:0050661//NADP binding	GO:0009536//plastid;GO:0016020//membrane
Unigene49846_All	278	GO:0048364//root development;GO:0006810//transport;GO:1901701;GO:0071310//cellular response to organic substance;GO:0007165//signal transduction;GO:0009725//response to hormone stimulus;GO:0006952//defense response;GO:0008152//metabolic process;GO:0009267//cellular response to starvation	-	-
Unigene4987_All	959	GO:0048364//root development;GO:0030154//cell differentiation;GO:0009653//anatomical structure morphogenesis	-	-
Unigene50349_All	481	GO:0090333//regulation of stomatal closure;GO:0010252//auxin homeostasis;GO:0009819//drought recovery;GO:0001558//regulation of cell growth;GO:0008283//cell proliferation;GO:0042742//defense response to bacterium;GO:0031117//positive regulation of microtubule depolymerization;GO:0048527//lateral root development;GO:0009790//embryo development;GO:0046686//response to cadmium ion;GO:0048768//root h…	GO:0008017//microtubule binding	GO:0005774//vacuolar membrane;GO:0048046//apoplast;GO:0009507//chloroplast;GO:0005794//Golgi apparatus;GO:0005829//cytosol;GO:0009579//thylakoid;GO:0090406//pollen tube;GO:0009506//plasmodesma;GO:0005886//plasma membrane;GO:0005634//nucleus
Unigene50849_All	527	GO:0009653//anatomical structure morphogenesis;GO:0048364//root development;GO:0071705;GO:0006820//anion transport;GO:0071702;GO:0048869//cellular developmental process;GO:0016043//cellular component organization;GO:0046907//intracellular transport	-	GO:0016020//membrane;GO:0043231//intracellular membrane-bounded organelle;GO:0005737//cytoplasm
Unigene51384_All	428	GO:0048364//root development;GO:0009850//auxin metabolic process;GO:0019277;GO:0030259//lipid glycosylation;GO:0009826//unidimensional cell growth;GO:0006468//protein phosphorylation;GO:0009741//response to brassinosteroid stimulus	GO:0030246//carbohydrate binding;GO:0004712//protein serine/threonine/tyrosine kinase activity;GO:0004674//protein serine/threonine kinase activity;GO:0005524//ATP binding;GO:0050511//undecaprenyldiphospho-muramoylpentapeptide beta-N-acetylglucosaminyltransferase activity	GO:0005737//cytoplasm;GO:0009506//plasmodesma;GO:0005886//plasma membrane;GO:0005634//nucleus
Unigene5188_All	1501	GO:0009845//seed germination;GO:0009867//jasmonic acid mediated signaling pathway;GO:0010154//fruit development;GO:0009887//organ morphogenesis;GO:0030968//endoplasmic reticulum unfolded protein response;GO:0009817//defense response to fungus, incompatible interaction;GO:0048527//lateral root development;GO:0016573//histone acetylation;GO:0009723//response to ethylene stimulus;GO:0007186//G-prote…	GO:0004871//signal transducer activity;GO:0004402//histone acetyltransferase activity	GO:0080008//Cul4-RING ubiquitin ligase complex;GO:0005783//endoplasmic reticulum;GO:0005886//plasma membrane
Unigene51894_All	242	GO:0048364//root development;GO:0009850//auxin metabolic process;GO:0019277;GO:0030259//lipid glycosylation;GO:0009826//unidimensional cell growth;GO:0006468//protein phosphorylation;GO:0009741//response to brassinosteroid stimulus	GO:0030246//carbohydrate binding;GO:0004712//protein serine/threonine/tyrosine kinase activity;GO:0004674//protein serine/threonine kinase activity;GO:0005524//ATP binding;GO:0050511//undecaprenyldiphospho-muramoylpentapeptide beta-N-acetylglucosaminyltransferase activity	GO:0005737//cytoplasm;GO:0009506//plasmodesma;GO:0005886//plasma membrane;GO:0005634//nucleus
Unigene52812_All	257	GO:0031348//negative regulation of defense response;GO:0016036//cellular response to phosphate starvation;GO:0019375//galactolipid biosynthetic process;GO:0009867//jasmonic acid mediated signaling pathway;GO:0009862//systemic acquired resistance, salicylic acid mediated signaling pathway;GO:0010363//regulation of plant-type hypersensitive response;GO:0042631//cellular response to water deprivatio…	GO:0004630//phospholipase D activity	GO:0005737//cytoplasm
Unigene53687_All	219	GO:0048364//root development;GO:0016036//cellular response to phosphate starvation;GO:0051788//response to misfolded protein;GO:0006635//fatty acid beta-oxidation;GO:0019375//galactolipid biosynthetic process;GO:0006995//cellular response to nitrogen starvation;GO:0043161//proteasomal ubiquitin-dependent protein catabolic process;GO:0042631//cellular response to water deprivation;GO:0009407//toxi…	GO:0004630//phospholipase D activity;GO:0005543//phospholipid binding	GO:0005773//vacuole;GO:0005634//nucleus
Unigene53795_All	241	GO:0006098//pentose-phosphate shunt;GO:0006094//gluconeogenesis;GO:0032504//multicellular organism reproduction;GO:0019288//isopentenyl diphosphate biosynthetic process, mevalonate-independent pathway;GO:0006816//calcium ion transport;GO:0009651//response to salt stress;GO:0006546//glycine catabolic process;GO:0007030//Golgi organization;GO:0010043//response to zinc ion;GO:0006096//glycolysis;GO:…	GO:0004807//triose-phosphate isomerase activity;GO:0005507//copper ion binding	GO:0009941//chloroplast envelope;GO:0048046//apoplast;GO:0005773//vacuole;GO:0005618//cell wall;GO:0005829//cytosol;GO:0009570//chloroplast stroma;GO:0009579//thylakoid;GO:0005886//plasma membrane;GO:0005739//mitochondrion
Unigene54753_All	286	GO:0048364//root development;GO:0009850//auxin metabolic process;GO:0019277;GO:0030259//lipid glycosylation;GO:0009826//unidimensional cell growth;GO:0006468//protein phosphorylation;GO:0009741//response to brassinosteroid stimulus	GO:0030246//carbohydrate binding;GO:0004712//protein serine/threonine/tyrosine kinase activity;GO:0004674//protein serine/threonine kinase activity;GO:0005524//ATP binding;GO:0050511//undecaprenyldiphospho-muramoylpentapeptide beta-N-acetylglucosaminyltransferase activity	GO:0005737//cytoplasm;GO:0009506//plasmodesma;GO:0005886//plasma membrane;GO:0005634//nucleus
Unigene55259_All	223	GO:0046686//response to cadmium ion;GO:0016310//phosphorylation;GO:0048367//shoot system development;GO:0048364//root development	GO:0016301//kinase activity	GO:0005730//nucleolus;GO:0022626//cytosolic ribosome;GO:0009507//chloroplast
Unigene55612_All	360	GO:0009725//response to hormone stimulus;GO:0048364//root development;GO:0071310//cellular response to organic substance;GO:0009791//post-embryonic development;GO:0007165//signal transduction;GO:0050832//defense response to fungus	-	GO:0009536//plastid
Unigene55847_All	216	GO:0009414//response to water deprivation;GO:0006944//cellular membrane fusion;GO:0007034//vacuolar transport;GO:0009958//positive gravitropism;GO:0010200//response to chitin;GO:0006355//regulation of transcription, DNA-dependent;GO:0009407//toxin catabolic process;GO:0009753//response to jasmonic acid stimulus;GO:0015031//protein transport;GO:0042538//hyperosmotic salinity response;GO:0007264//s…	GO:0005515//protein binding;GO:0005525//GTP binding;GO:0016787//hydrolase activity;GO:0043565//sequence-specific DNA binding;GO:0003700//sequence-specific DNA binding transcription factor activity	GO:0005774//vacuolar membrane;GO:0005769//early endosome;GO:0005783//endoplasmic reticulum;GO:0005886//plasma membrane;GO:0005634//nucleus
Unigene56013_All	370	GO:0046686//response to cadmium ion;GO:0016310//phosphorylation;GO:0048367//shoot system development;GO:0048364//root development	GO:0016301//kinase activity	GO:0005730//nucleolus;GO:0022626//cytosolic ribosome;GO:0009507//chloroplast
Unigene56756_All	215	GO:0010267//production of ta-siRNAs involved in RNA interference;GO:0006346//methylation-dependent chromatin silencing;GO:0009965//leaf morphogenesis;GO:0048439//flower morphogenesis;GO:0010589//leaf proximal/distal pattern formation;GO:0048765//root hair cell differentiation;GO:0051301//cell division;GO:0006306//DNA methylation;GO:0009926//auxin polar transport;GO:0010072//primary shoot apical m…	GO:0004521//endoribonuclease activity;GO:0035197//siRNA binding;GO:0005515//protein binding;GO:0035198//miRNA binding	GO:0019898//extrinsic to membrane;GO:0005829//cytosol;GO:0005634//nucleus
Unigene5711_All	624	GO:0048364//root development;GO:0019287//isopentenyl diphosphate biosynthetic process, mevalonate pathway;GO:0019288//isopentenyl diphosphate biosynthetic process, mevalonate-independent pathway;GO:0016125//sterol metabolic process;GO:0050790//regulation of catalytic activity	GO:0034046//poly(G) RNA binding	GO:0005739//mitochondrion
Unigene57575_All	513	GO:0040007//growth;GO:0016560//protein import into peroxisome matrix, docking;GO:0048527//lateral root development;GO:0006515//misfolded or incompletely synthesized protein catabolic process	GO:0004176//ATP-dependent peptidase activity;GO:0005524//ATP binding;GO:0004252//serine-type endopeptidase activity	GO:0005782//peroxisomal matrix
Unigene57631_All	2305	GO:0043622//cortical microtubule organization;GO:0009664//plant-type cell wall organization;GO:0008283//cell proliferation;GO:0007020//microtubule nucleation;GO:0005982//starch metabolic process;GO:0030244//cellulose biosynthetic process;GO:0048193//Golgi vesicle transport;GO:0051322//anaphase;GO:0051302//regulation of cell division;GO:0001578//microtubule bundle formation;GO:0019344//cysteine bi…	GO:0046983//protein dimerization activity;GO:0008017//microtubule binding	GO:0072686//mitotic spindle;GO:0009524//phragmoplast;GO:0005829//cytosol;GO:0009574//preprophase band;GO:0005634//nucleus;GO:0010005//cortical microtubule, transverse to long axis
Unigene58337_All	288	GO:0048364//root development;GO:0044260;GO:0090304;GO:0009407//toxin catabolic process;GO:0009624//response to nematode;GO:0061062//regulation of nematode larval development;GO:0009742//brassinosteroid mediated signaling pathway;GO:0048366//leaf development;GO:0006626//protein targeting to mitochondrion	GO:0016787//hydrolase activity;GO:0005524//ATP binding;GO:0045309//protein phosphorylated amino acid binding	GO:0005773//vacuole;GO:0009507//chloroplast;GO:0005618//cell wall;GO:0005794//Golgi apparatus;GO:0005829//cytosol;GO:0005635//nuclear envelope;GO:0009506//plasmodesma;GO:0005886//plasma membrane;GO:0005739//mitochondrion
Unigene5888_All	2247	GO:0043622//cortical microtubule organization;GO:0009664//plant-type cell wall organization;GO:0008283//cell proliferation;GO:0007020//microtubule nucleation;GO:0005982//starch metabolic process;GO:0030244//cellulose biosynthetic process;GO:0048193//Golgi vesicle transport;GO:0051322//anaphase;GO:0051302//regulation of cell division;GO:0001578//microtubule bundle formation;GO:0019344//cysteine bi…	GO:0046983//protein dimerization activity;GO:0008017//microtubule binding	GO:0072686//mitotic spindle;GO:0009524//phragmoplast;GO:0005829//cytosol;GO:0009574//preprophase band;GO:0005634//nucleus;GO:0010005//cortical microtubule, transverse to long axis
Unigene59395_All	263	GO:0040007//growth;GO:0016560//protein import into peroxisome matrix, docking;GO:0048527//lateral root development;GO:0006515//misfolded or incompletely synthesized protein catabolic process	GO:0004176//ATP-dependent peptidase activity;GO:0005524//ATP binding;GO:0004252//serine-type endopeptidase activity	GO:0005782//peroxisomal matrix
Unigene5940_All	615	GO:0005975//carbohydrate metabolic process;GO:0048364//root development;GO:0006520//cellular amino acid metabolic process	GO:0004575//sucrose alpha-glucosidase activity;GO:0033926	GO:0005886//plasma membrane;GO:0005634//nucleus;GO:0005829//cytosol
Unigene59885_All	1024	GO:2000069//regulation of post-embryonic root development;GO:0009750//response to fructose stimulus;GO:0009744//response to sucrose stimulus;GO:0046777//protein autophosphorylation;GO:0048510//regulation of timing of transition from vegetative to reproductive phase;GO:0010182//sugar mediated signaling pathway;GO:0010105//negative regulation of ethylene mediated signaling pathway;GO:0009686//gibbe…	GO:0005515//protein binding;GO:0004674//protein serine/threonine kinase activity	GO:0005789//endoplasmic reticulum membrane
Unigene62719_All	328	GO:0009653//anatomical structure morphogenesis;GO:0048364//root development;GO:0044763;GO:0009791//post-embryonic development;GO:0048608//reproductive structure development;GO:0048367//shoot system development;GO:0044765;GO:0065007//biological regulation;GO:0009725//response to hormone stimulus	-	GO:0043227//membrane-bounded organelle;GO:0005737//cytoplasm;GO:0044425//membrane part;GO:0005886//plasma membrane
Unigene63534_All	261	GO:0048589//developmental growth;GO:0010106//cellular response to iron ion starvation;GO:0015706//nitrate transport;GO:0006826//iron ion transport;GO:0048527//lateral root development;GO:0003333//amino acid transmembrane transport;GO:0048765//root hair cell differentiation;GO:0010167//response to nitrate;GO:0010087//phloem or xylem histogenesis;GO:0015812//gamma-aminobutyric acid transport;GO:001…	GO:0015189//L-lysine transmembrane transporter activity;GO:0016740//transferase activity;GO:0005313//L-glutamate transmembrane transporter activity;GO:0015180//L-alanine transmembrane transporter activity;GO:0015185//gamma-aminobutyric acid transmembrane transporter activity;GO:0003996//acyl-CoA ligase activity;GO:0015181//arginine transmembrane transporter activity	GO:0016021//integral to membrane;GO:0005783//endoplasmic reticulum;GO:0005634//nucleus;GO:0005739//mitochondrion
Unigene63785_All	217	GO:0048364//root development;GO:0019287//isopentenyl diphosphate biosynthetic process, mevalonate pathway;GO:0019288//isopentenyl diphosphate biosynthetic process, mevalonate-independent pathway;GO:0016125//sterol metabolic process;GO:0050790//regulation of catalytic activity	GO:0034046//poly(G) RNA binding	GO:0005739//mitochondrion
Unigene6409_All	4714	GO:0009788//negative regulation of abscisic acid mediated signaling pathway;GO:0006346//methylation-dependent chromatin silencing;GO:0016246//RNA interference;GO:0009739//response to gibberellin stimulus;GO:2000023//regulation of lateral root development;GO:0008283//cell proliferation;GO:0009736//cytokinin mediated signaling pathway;GO:0009733//response to auxin stimulus	GO:0046914//transition metal ion binding;GO:0003677//DNA binding;GO:0016887//ATPase activity;GO:0003678//DNA helicase activity	GO:0005634//nucleus
Unigene64386_All	1568	GO:0048589//developmental growth;GO:0045492//xylan biosynthetic process;GO:0007155//cell adhesion;GO:0006944//cellular membrane fusion;GO:0045010//actin nucleation;GO:0033044//regulation of chromosome organization;GO:0006355//regulation of transcription, DNA-dependent;GO:0010090//trichome morphogenesis;GO:0071249//cellular response to nitrate;GO:0048527//lateral root development;GO:0009556//micro…	GO:0032440//2-alkenal reductase [NAD(P)] activity;GO:0046983//protein dimerization activity;GO:0003677//DNA binding;GO:0003700//sequence-specific DNA binding transcription factor activity;GO:0008134//transcription factor binding	GO:0005634//nucleus
Unigene64387_All	1501	GO:0048589//developmental growth;GO:0045492//xylan biosynthetic process;GO:0007155//cell adhesion;GO:0006944//cellular membrane fusion;GO:0045010//actin nucleation;GO:0033044//regulation of chromosome organization;GO:0006355//regulation of transcription, DNA-dependent;GO:0010090//trichome morphogenesis;GO:0071249//cellular response to nitrate;GO:0048527//lateral root development;GO:0009556//micro…	GO:0032440//2-alkenal reductase [NAD(P)] activity;GO:0046983//protein dimerization activity;GO:0003677//DNA binding;GO:0003700//sequence-specific DNA binding transcription factor activity;GO:0008134//transcription factor binding	GO:0005634//nucleus
Unigene65545_All	502	GO:0048768//root hair cell tip growth;GO:0042742//defense response to bacterium;GO:0001558//regulation of cell growth;GO:0009860//pollen tube growth;GO:0010252//auxin homeostasis;GO:0048527//lateral root development;GO:0008283//cell proliferation;GO:0046686//response to cadmium ion;GO:0040014//regulation of multicellular organism growth;GO:0007346//regulation of mitotic cell cycle;GO:0009790//emb…	-	GO:0009579//thylakoid;GO:0009507//chloroplast;GO:0090406//pollen tube;GO:0005634//nucleus;GO:0005886//plasma membrane;GO:0048046//apoplast
Unigene65598_All	1221	GO:0016049//cell growth;GO:0045848//positive regulation of nitrogen utilization;GO:0048364//root development;GO:0009395//phospholipid catabolic process;GO:0051301//cell division;GO:0051365//cellular response to potassium ion starvation;GO:0006970//response to osmotic stress;GO:0009791//post-embryonic development;GO:0006995//cellular response to nitrogen starvation;GO:0016036//cellular response to…	GO:0004630//phospholipase D activity	GO:0005886//plasma membrane
Unigene67263_All	990	GO:0055114//oxidation-reduction process;GO:0080022//primary root development;GO:0048658//tapetal layer development;GO:0080144//amino acid homeostasis;GO:0009555//pollen development;GO:0006006//glucose metabolic process	GO:0051287//NAD binding;GO:0005507//copper ion binding;GO:0008270//zinc ion binding;GO:0004365//glyceraldehyde-3-phosphate dehydrogenase (NAD+) (phosphorylating) activity;GO:0050661//NADP binding	GO:0009536//plastid;GO:0016020//membrane
Unigene67265_All	951	GO:0048364//root development;GO:0030154//cell differentiation;GO:0009653//anatomical structure morphogenesis	-	-
Unigene67533_All	274	GO:0048364//root development;GO:0006417//regulation of translation;GO:0006355//regulation of transcription, DNA-dependent;GO:0009647//skotomorphogenesis;GO:0010262//somatic embryogenesis;GO:0010583//response to cyclopentenone;GO:0009630//gravitropism;GO:0010588//cotyledon vascular tissue pattern formation;GO:0009734//auxin mediated signaling pathway	GO:0046983//protein dimerization activity;GO:0003700//sequence-specific DNA binding transcription factor activity	GO:0005739//mitochondrion;GO:0009536//plastid;GO:0005634//nucleus
Unigene69007_All	270	GO:0009750//response to fructose stimulus;GO:0042744//hydrogen peroxide catabolic process;GO:0006833//water transport;GO:0019288//isopentenyl diphosphate biosynthetic process, mevalonate-independent pathway;GO:0006355//regulation of transcription, DNA-dependent;GO:0009651//response to salt stress;GO:0006972//hyperosmotic response;GO:0007030//Golgi organization;GO:0006096//glycolysis;GO:0032880//r…	GO:0016818//hydrolase activity, acting on acid anhydrides, in phosphorus-containing anhydrides;GO:0005509//calcium ion binding;GO:0019904//protein domain specific binding;GO:0005524//ATP binding;GO:0045309//protein phosphorylated amino acid binding	GO:0005829//cytosol;GO:0009570//chloroplast stroma;GO:0005886//plasma membrane;GO:0005634//nucleus
Unigene70158_All	247	GO:0009958//positive gravitropism;GO:0010078//maintenance of root meristem identity;GO:0048825//cotyledon development;GO:0048467//gynoecium development;GO:0080022//primary root development;GO:0009684//indoleacetic acid biosynthetic process;GO:0009641//shade avoidance;GO:0048366//leaf development;GO:0010087//phloem or xylem histogenesis;GO:0010588//cotyledon vascular tissue pattern formation;GO:00…	GO:0080099//L-methionine:2-oxoglutarate aminotransferase activity;GO:0004021//L-alanine:2-oxoglutarate aminotransferase activity;GO:0047312//L-phenylalanine:pyruvate aminotransferase activity;GO:0080098//L-tyrosine:pyruvate aminotransferase activity;GO:0080097//L-tryptophan:pyruvate aminotransferase activity;GO:0050048//L-leucine:2-oxoglutarate aminotransferase activity;GO:0050362//L-tryptophan:2…	GO:0005737//cytoplasm
Unigene70744_All	299	GO:0050789//regulation of biological process;GO:0016049//cell growth;GO:0048364//root development;GO:0016043//cellular component organization	-	GO:0044424//intracellular part
Unigene7116_All	1123	GO:0006468//protein phosphorylation;GO:0048364//root development;GO:0009850//auxin metabolic process;GO:0009741//response to brassinosteroid stimulus;GO:0009826//unidimensional cell growth	GO:0004674//protein serine/threonine kinase activity;GO:0005524//ATP binding	-
Unigene73134_All	278	GO:0048367//shoot system development;GO:0048364//root development;GO:0010154//fruit development;GO:0009790//embryo development	-	GO:0005739//mitochondrion
Unigene7438_All	3648	GO:0048364//root development;GO:0009735//response to cytokinin stimulus;GO:0010072//primary shoot apical meristem specification;GO:0030497//fatty acid elongation	GO:0003989//acetyl-CoA carboxylase activity;GO:0046872//metal ion binding;GO:0005524//ATP binding;GO:0004075//biotin carboxylase activity	GO:0005886//plasma membrane
Unigene8219_All	2474	GO:0043622//cortical microtubule organization;GO:0009664//plant-type cell wall organization;GO:0008283//cell proliferation;GO:0007020//microtubule nucleation;GO:0005982//starch metabolic process;GO:0030244//cellulose biosynthetic process;GO:0048193//Golgi vesicle transport;GO:0051322//anaphase;GO:0051302//regulation of cell division;GO:0001578//microtubule bundle formation;GO:0019344//cysteine bi…	GO:0046983//protein dimerization activity;GO:0008017//microtubule binding	GO:0072686//mitotic spindle;GO:0009524//phragmoplast;GO:0005829//cytosol;GO:0009574//preprophase band;GO:0005634//nucleus;GO:0010005//cortical microtubule, transverse to long axis
Unigene9400_All	1477	GO:0048527//lateral root development	GO:0016874//ligase activity	GO:0005634//nucleus
Unigene9401_All	1737	GO:0048527//lateral root development	GO:0005515//protein binding;GO:0004842//ubiquitin-protein ligase activity	GO:0005634//nucleus
Lateral root formation
CL11836.Contig1_All	464	GO:0010090//trichome morphogenesis;GO:0071555//cell wall organization;GO:0010311//lateral root formation;GO:0007155//cell adhesion;GO:0010089//xylem development;GO:0048765//root hair cell differentiation;GO:0045010//actin nucleation;GO:0044036//cell wall macromolecule metabolic process	-	GO:0005634//nucleus
CL11836.Contig2_All	543	GO:0010090//trichome morphogenesis;GO:0071555//cell wall organization;GO:0010311//lateral root formation;GO:0007155//cell adhesion;GO:0010089//xylem development;GO:0048765//root hair cell differentiation;GO:0045010//actin nucleation;GO:0044036//cell wall macromolecule metabolic process	-	GO:0005634//nucleus
CL13372.Contig1_All	1313	GO:0055114//oxidation-reduction process;GO:0009620//response to fungus;GO:0009926//auxin polar transport;GO:0009640//photomorphogenesis;GO:0010073//meristem maintenance;GO:0010311//lateral root formation;GO:0009733//response to auxin stimulus;GO:0048283//indeterminate inflorescence morphogenesis;GO:0009826//unidimensional cell growth;GO:0016036//cellular response to phosphate starvation;GO:008016…	GO:0016682//oxidoreductase activity, acting on diphenols and related substances as donors, oxygen as acceptor;GO:0005507//copper ion binding;GO:0047705	GO:0005829//cytosol;GO:0005618//cell wall;GO:0009506//plasmodesma;GO:0005576//extracellular region;GO:0016020//membrane;GO:0005794//Golgi apparatus;GO:0005783//endoplasmic reticulum
CL13372.Contig2_All	1531	GO:0055114//oxidation-reduction process;GO:0009620//response to fungus;GO:0009926//auxin polar transport;GO:0009640//photomorphogenesis;GO:0010073//meristem maintenance;GO:0010311//lateral root formation;GO:0009733//response to auxin stimulus;GO:0048283//indeterminate inflorescence morphogenesis;GO:0009826//unidimensional cell growth;GO:0016036//cellular response to phosphate starvation;GO:008016…	GO:0016682//oxidoreductase activity, acting on diphenols and related substances as donors, oxygen as acceptor;GO:0005507//copper ion binding	GO:0005829//cytosol;GO:0005618//cell wall;GO:0009506//plasmodesma;GO:0016023//cytoplasmic membrane-bounded vesicle;GO:0005576//extracellular region;GO:0016020//membrane;GO:0005794//Golgi apparatus;GO:0005783//endoplasmic reticulum
CL15913.Contig1_All	427	GO:0009753//response to jasmonic acid stimulus;GO:0034440//lipid oxidation;GO:0072330;GO:0010311//lateral root formation;GO:0009737//response to abscisic acid stimulus;GO:0009816//defense response to bacterium, incompatible interaction	GO:0016165//lipoxygenase activity	GO:0009536//plastid
CL15913.Contig2_All	438	GO:0009753//response to jasmonic acid stimulus;GO:0034440//lipid oxidation;GO:0009611//response to wounding;GO:0040007//growth;GO:0009695//jasmonic acid biosynthetic process;GO:0010311//lateral root formation;GO:0009737//response to abscisic acid stimulus;GO:0030397//membrane disassembly;GO:0009816//defense response to bacterium, incompatible interaction	GO:0016165//lipoxygenase activity	GO:0009536//plastid
CL1612.Contig10_All	3635	GO:0010311//lateral root formation	GO:0016905//myosin heavy chain kinase activity	-
CL1612.Contig11_All	1867	GO:0010311//lateral root formation	GO:0016905//myosin heavy chain kinase activity	-
CL1612.Contig12_All	3121	GO:0010311//lateral root formation	GO:0016905//myosin heavy chain kinase activity	-
CL1612.Contig13_All	2340	GO:0010311//lateral root formation	GO:0016905//myosin heavy chain kinase activity	-
CL1612.Contig14_All	2151	GO:0010311//lateral root formation	GO:0016905//myosin heavy chain kinase activity	-
CL1612.Contig15_All	3348	GO:0010311//lateral root formation	GO:0016905//myosin heavy chain kinase activity	-
CL1612.Contig16_All	4100	GO:0010311//lateral root formation	GO:0016905//myosin heavy chain kinase activity	-
CL1612.Contig17_All	2465	GO:0010311//lateral root formation	GO:0016905//myosin heavy chain kinase activity	-
CL1612.Contig18_All	2327	GO:0010311//lateral root formation	GO:0016905//myosin heavy chain kinase activity	-
CL1612.Contig19_All	2928	GO:0010311//lateral root formation	GO:0016905//myosin heavy chain kinase activity	-
CL1612.Contig1_All	3339	GO:0010311//lateral root formation	GO:0016905//myosin heavy chain kinase activity	-
CL1612.Contig20_All	2128	GO:0010311//lateral root formation	GO:0016905//myosin heavy chain kinase activity	-
CL1612.Contig2_All	3363	GO:0010311//lateral root formation	GO:0016905//myosin heavy chain kinase activity	-
CL1612.Contig3_All	3136	GO:0010311//lateral root formation	GO:0016905//myosin heavy chain kinase activity	-
CL1612.Contig4_All	3528	GO:0010311//lateral root formation	GO:0016905//myosin heavy chain kinase activity	-
CL1612.Contig5_All	3112	GO:0010311//lateral root formation	GO:0016905//myosin heavy chain kinase activity	-
CL1612.Contig6_All	3571	GO:0010311//lateral root formation	GO:0016905//myosin heavy chain kinase activity	-
CL1612.Contig7_All	1742	GO:0010311//lateral root formation	GO:0016905//myosin heavy chain kinase activity	-
CL1612.Contig8_All	3683	GO:0010311//lateral root formation	GO:0016905//myosin heavy chain kinase activity	-
CL1612.Contig9_All	3859	GO:0010311//lateral root formation	GO:0016905//myosin heavy chain kinase activity	-
CL18500.Contig1_All	3091	GO:0010311//lateral root formation;GO:0002679//respiratory burst involved in defense response;GO:0010200//response to chitin;GO:0009617//response to bacterium;GO:0048829//root cap development;GO:0006542//glutamine biosynthetic process;GO:0006569//tryptophan catabolic process;GO:0009684//indoleacetic acid biosynthetic process;GO:0009737//response to abscisic acid stimulus;GO:0009399//nitrogen fixa…	GO:0043015//gamma-tubulin binding;GO:0043621//protein self-association;GO:0008017//microtubule binding;GO:0004356//glutamate-ammonia ligase activity;GO:0005524//ATP binding	GO:0005829//cytosol
CL18500.Contig2_All	2896	GO:0010311//lateral root formation;GO:0002679//respiratory burst involved in defense response;GO:0010200//response to chitin;GO:0009617//response to bacterium;GO:0048829//root cap development;GO:0006542//glutamine biosynthetic process;GO:0006569//tryptophan catabolic process;GO:0009684//indoleacetic acid biosynthetic process;GO:0009737//response to abscisic acid stimulus;GO:0009399//nitrogen fixa…	GO:0043015//gamma-tubulin binding;GO:0043621//protein self-association;GO:0008017//microtubule binding;GO:0004356//glutamate-ammonia ligase activity;GO:0005524//ATP binding	GO:0005829//cytosol
CL18650.Contig1_All	591	GO:0007000//nucleolus organization;GO:0009786//regulation of asymmetric cell division;GO:0050826//response to freezing;GO:0006521//regulation of cellular amino acid metabolic process;GO:0000911//cytokinesis by cell plate formation;GO:0010311//lateral root formation;GO:0048829//root cap development;GO:0048825//cotyledon development;GO:0009640//photomorphogenesis;GO:0019915//lipid storage;GO:001018…	GO:0019199//transmembrane receptor protein kinase activity;GO:0016597//amino acid binding;GO:0004674//protein serine/threonine kinase activity;GO:0042803//protein homodimerization activity;GO:0005524//ATP binding	GO:0009507//chloroplast;GO:0005829//cytosol;GO:0009986//cell surface;GO:0030139//endocytic vesicle;GO:0005886//plasma membrane
CL18810.Contig3_All	4950	GO:0006511//ubiquitin-dependent protein catabolic process;GO:0010103//stomatal complex morphogenesis;GO:0042752//regulation of circadian rhythm;GO:0010311//lateral root formation;GO:0048443//stamen development;GO:0002237//response to molecule of bacterial origin;GO:0010152//pollen maturation;GO:0009734//auxin mediated signaling pathway;GO:0016036//cellular response to phosphate starvation	GO:0000822//inositol hexakisphosphate binding;GO:0010011//auxin binding;GO:0004842//ubiquitin-protein ligase activity;GO:0005515//protein binding	GO:0019005//SCF ubiquitin ligase complex;GO:0005634//nucleus
CL1972.Contig4_All	3298	GO:0060919;GO:0009958//positive gravitropism;GO:0010311//lateral root formation;GO:0048829//root cap development;GO:0048765//root hair cell differentiation;GO:0001736//establishment of planar polarity;GO:0009734//auxin mediated signaling pathway;GO:0009624//response to nematode;GO:0006865//amino acid transport	GO:0010328//auxin influx transmembrane transporter activity;GO:0015293//symporter activity;GO:0010011//auxin binding	GO:0016021//integral to membrane;GO:0009986//cell surface;GO:0005768//endosome;GO:0005794//Golgi apparatus;GO:0005886//plasma membrane
CL1972.Contig5_All	1802	GO:0009926//auxin polar transport;GO:0009733//response to auxin stimulus;GO:0060919;GO:0010311//lateral root formation;GO:0048829//root cap development	GO:0010328//auxin influx transmembrane transporter activity	GO:0016021//integral to membrane
CL1972.Contig6_All	2441	GO:0060919;GO:0009958//positive gravitropism;GO:0010311//lateral root formation;GO:0048829//root cap development;GO:0048765//root hair cell differentiation;GO:0001736//establishment of planar polarity;GO:0009734//auxin mediated signaling pathway;GO:0009624//response to nematode;GO:0006865//amino acid transport	GO:0010328//auxin influx transmembrane transporter activity;GO:0015293//symporter activity;GO:0010011//auxin binding	GO:0016021//integral to membrane;GO:0009986//cell surface;GO:0005768//endosome;GO:0005794//Golgi apparatus;GO:0005886//plasma membrane
CL1972.Contig7_All	636	GO:0006865//amino acid transport;GO:0010218//response to far red light;GO:0007155//cell adhesion;GO:0006949//syncytium formation;GO:0009825//multidimensional cell growth;GO:0045010//actin nucleation;GO:0009958//positive gravitropism;GO:0010311//lateral root formation;GO:0009734//auxin mediated signaling pathway;GO:0048829//root cap development;GO:0007389//pattern specification process;GO:0009624/…	GO:0015293//symporter activity;GO:0010328//auxin influx transmembrane transporter activity;GO:0015171//amino acid transmembrane transporter activity;GO:0010011//auxin binding	GO:0016021//integral to membrane;GO:0005794//Golgi apparatus;GO:0009986//cell surface;GO:0005768//endosome;GO:0005886//plasma membrane
CL1972.Contig8_All	2970	GO:0060919;GO:0009958//positive gravitropism;GO:0010311//lateral root formation;GO:0048829//root cap development;GO:0048765//root hair cell differentiation;GO:0001736//establishment of planar polarity;GO:0009734//auxin mediated signaling pathway;GO:0009624//response to nematode;GO:0006865//amino acid transport	GO:0010328//auxin influx transmembrane transporter activity;GO:0015293//symporter activity;GO:0010011//auxin binding	GO:0016021//integral to membrane;GO:0009986//cell surface;GO:0005768//endosome;GO:0005794//Golgi apparatus;GO:0005886//plasma membrane
CL3963.Contig1_All	2237	GO:0009958//positive gravitropism;GO:0048767//root hair elongation;GO:0046488//phosphatidylinositol metabolic process;GO:0010311//lateral root formation;GO:0016310//phosphorylation;GO:0003006//developmental process involved in reproduction	GO:0003785//actin monomer binding;GO:0051015//actin filament binding;GO:0016308//1-phosphatidylinositol-4-phosphate 5-kinase activity	GO:0005634//nucleus;GO:0005886//plasma membrane
CL3963.Contig3_All	2685	GO:0009958//positive gravitropism;GO:0048767//root hair elongation;GO:0046488//phosphatidylinositol metabolic process;GO:0010311//lateral root formation;GO:0016310//phosphorylation;GO:0003006//developmental process involved in reproduction	GO:0003785//actin monomer binding;GO:0051015//actin filament binding;GO:0016308//1-phosphatidylinositol-4-phosphate 5-kinase activity	GO:0005634//nucleus;GO:0005886//plasma membrane
CL3963.Contig4_All	2619	GO:0009958//positive gravitropism;GO:0046488//phosphatidylinositol metabolic process;GO:0040007//growth;GO:0010311//lateral root formation;GO:0016310//phosphorylation;GO:0003006//developmental process involved in reproduction	GO:0003785//actin monomer binding;GO:0051015//actin filament binding;GO:0016308//1-phosphatidylinositol-4-phosphate 5-kinase activity	GO:0005634//nucleus;GO:0005886//plasma membrane
CL3963.Contig6_All	3235	GO:0009958//positive gravitropism;GO:0046488//phosphatidylinositol metabolic process;GO:0040007//growth;GO:0010311//lateral root formation;GO:0016310//phosphorylation;GO:0003006//developmental process involved in reproduction	GO:0003785//actin monomer binding;GO:0051015//actin filament binding;GO:0016308//1-phosphatidylinositol-4-phosphate 5-kinase activity	GO:0005634//nucleus;GO:0005886//plasma membrane
CL3963.Contig8_All	2741	GO:0009958//positive gravitropism;GO:0046488//phosphatidylinositol metabolic process;GO:0040007//growth;GO:0010311//lateral root formation;GO:0016310//phosphorylation;GO:0003006//developmental process involved in reproduction	GO:0003785//actin monomer binding;GO:0051015//actin filament binding;GO:0016308//1-phosphatidylinositol-4-phosphate 5-kinase activity	GO:0005634//nucleus;GO:0005886//plasma membrane
CL4565.Contig2_All	712	GO:0007155//cell adhesion;GO:0045010//actin nucleation;GO:0010311//lateral root formation;GO:0009734//auxin mediated signaling pathway;GO:0006355//regulation of transcription, DNA-dependent;GO:0010090//trichome morphogenesis;GO:0010583//response to cyclopentenone;GO:0048765//root hair cell differentiation;GO:0048366//leaf development;GO:0009741//response to brassinosteroid stimulus;GO:0009723//re…	GO:0046983//protein dimerization activity;GO:0043565//sequence-specific DNA binding;GO:0003700//sequence-specific DNA binding transcription factor activity	GO:0005634//nucleus
CL4565.Contig3_All	759	GO:0007155//cell adhesion;GO:0045010//actin nucleation;GO:0010311//lateral root formation;GO:0009734//auxin mediated signaling pathway;GO:0006355//regulation of transcription, DNA-dependent;GO:0010090//trichome morphogenesis;GO:0010583//response to cyclopentenone;GO:0048765//root hair cell differentiation;GO:0048366//leaf development;GO:0009741//response to brassinosteroid stimulus;GO:0009723//re…	GO:0046983//protein dimerization activity;GO:0043565//sequence-specific DNA binding;GO:0003700//sequence-specific DNA binding transcription factor activity	GO:0005634//nucleus
CL5890.Contig1_All	3213	GO:0010449//root meristem growth;GO:0010305//leaf vascular tissue pattern formation;GO:0010073//meristem maintenance;GO:0010311//lateral root formation;GO:0048366//leaf development;GO:2000012//regulation of auxin polar transport;GO:0009790//embryo development	GO:0000166//nucleotide binding;GO:0016846//carbon-sulfur lyase activity	GO:0005634//nucleus
CL5890.Contig2_All	2991	GO:0010449//root meristem growth;GO:0010305//leaf vascular tissue pattern formation;GO:0010073//meristem maintenance;GO:0010311//lateral root formation;GO:0048366//leaf development;GO:2000012//regulation of auxin polar transport;GO:0009790//embryo development	GO:0000166//nucleotide binding;GO:0016846//carbon-sulfur lyase activity	GO:0005634//nucleus
CL6032.Contig3_All	279	GO:0051781//positive regulation of cell division;GO:0010286//heat acclimation;GO:0010311//lateral root formation;GO:0045892//negative regulation of transcription, DNA-dependent;GO:0071365//cellular response to auxin stimulus;GO:0016567//protein ubiquitination;GO:0031146//SCF-dependent proteasomal ubiquitin-dependent protein catabolic process;GO:1901332//negative regulation of lateral root develop…	GO:0005515//protein binding;GO:0004842//ubiquitin-protein ligase activity	GO:0005737//cytoplasm;GO:0019005//SCF ubiquitin ligase complex;GO:0005634//nucleus
CL6708.Contig1_All	3035	GO:0006351//transcription, DNA-dependent;GO:0007155//cell adhesion;GO:0045010//actin nucleation;GO:0010311//lateral root formation;GO:0010090//trichome morphogenesis;GO:0010583//response to cyclopentenone;GO:0048765//root hair cell differentiation;GO:0048366//leaf development;GO:0009741//response to brassinosteroid stimulus;GO:0009723//response to ethylene stimulus;GO:0009733//response to auxin s…	GO:0046983//protein dimerization activity;GO:0043565//sequence-specific DNA binding	GO:0009506//plasmodesma;GO:0005634//nucleus
CL6708.Contig3_All	2873	GO:0006351//transcription, DNA-dependent;GO:0007155//cell adhesion;GO:0045010//actin nucleation;GO:0010311//lateral root formation;GO:0010090//trichome morphogenesis;GO:0010583//response to cyclopentenone;GO:0048765//root hair cell differentiation;GO:0048366//leaf development;GO:0009741//response to brassinosteroid stimulus;GO:0009723//response to ethylene stimulus;GO:0009733//response to auxin s…	GO:0046983//protein dimerization activity;GO:0043565//sequence-specific DNA binding	GO:0009506//plasmodesma;GO:0005634//nucleus
CL6726.Contig2_All	940	GO:0000278//mitotic cell cycle;GO:0080119//ER body organization;GO:0006094//gluconeogenesis;GO:0010431//seed maturation;GO:0007155//cell adhesion;GO:0000911//cytokinesis by cell plate formation;GO:0032509//endosome transport via multivesicular body sorting pathway;GO:0045010//actin nucleation;GO:0010311//lateral root formation;GO:0033044//regulation of chromosome organization;GO:0010498//proteaso…	GO:0010292//GTP:GDP antiporter activity;GO:0005086//ARF guanyl-nucleotide exchange factor activity;GO:0042803//protein homodimerization activity	GO:0005802//trans-Golgi network;GO:0005768//endosome;GO:0005886//plasma membrane
CL6726.Contig3_All	5276	GO:0000278//mitotic cell cycle;GO:0006094//gluconeogenesis;GO:0010431//seed maturation;GO:0007155//cell adhesion;GO:0000911//cytokinesis by cell plate formation;GO:0032509//endosome transport via multivesicular body sorting pathway;GO:0045010//actin nucleation;GO:0010311//lateral root formation;GO:0033044//regulation of chromosome organization;GO:0010498//proteasomal protein catabolic process;GO:…	GO:0010292//GTP:GDP antiporter activity;GO:0005086//ARF guanyl-nucleotide exchange factor activity;GO:0042803//protein homodimerization activity	GO:0005768//endosome;GO:0005886//plasma membrane
CL6726.Contig5_All	705	GO:0000278//mitotic cell cycle;GO:0006094//gluconeogenesis;GO:0010431//seed maturation;GO:0007155//cell adhesion;GO:0000911//cytokinesis by cell plate formation;GO:0032509//endosome transport via multivesicular body sorting pathway;GO:0045010//actin nucleation;GO:0010311//lateral root formation;GO:0033044//regulation of chromosome organization;GO:0010498//proteasomal protein catabolic process;GO:…	GO:0010292//GTP:GDP antiporter activity;GO:0005086//ARF guanyl-nucleotide exchange factor activity;GO:0042803//protein homodimerization activity	GO:0005768//endosome;GO:0005886//plasma membrane
CL6726.Contig6_All	5263	GO:0000278//mitotic cell cycle;GO:0006094//gluconeogenesis;GO:0010431//seed maturation;GO:0007155//cell adhesion;GO:0000911//cytokinesis by cell plate formation;GO:0032509//endosome transport via multivesicular body sorting pathway;GO:0045010//actin nucleation;GO:0010311//lateral root formation;GO:0033044//regulation of chromosome organization;GO:0010498//proteasomal protein catabolic process;GO:…	GO:0010292//GTP:GDP antiporter activity;GO:0005086//ARF guanyl-nucleotide exchange factor activity;GO:0042803//protein homodimerization activity	GO:0005768//endosome;GO:0005886//plasma membrane
CL704.Contig1_All	1421	GO:0010311//lateral root formation;GO:0030154//cell differentiation;GO:0006334//nucleosome assembly;GO:0008283//cell proliferation;GO:0046686//response to cadmium ion	GO:0042393//histone binding;GO:0003682//chromatin binding	GO:0005737//cytoplasm;GO:0005634//nucleus
CL704.Contig2_All	1335	GO:0010311//lateral root formation;GO:0030154//cell differentiation;GO:0006334//nucleosome assembly;GO:0008283//cell proliferation;GO:0046686//response to cadmium ion	GO:0042393//histone binding;GO:0003682//chromatin binding	GO:0005737//cytoplasm;GO:0005634//nucleus
CL7889.Contig1_All	1019	GO:0010311//lateral root formation	GO:0046872//metal ion binding;GO:0020037//heme binding	GO:0005829//cytosol
CL7889.Contig3_All	902	GO:0010311//lateral root formation	GO:0046872//metal ion binding;GO:0020037//heme binding	GO:0005829//cytosol
Unigene10777_All	421	GO:0009620//response to fungus;GO:0009926//auxin polar transport;GO:0009640//photomorphogenesis;GO:0010311//lateral root formation;GO:0009733//response to auxin stimulus;GO:0048283//indeterminate inflorescence morphogenesis;GO:0009826//unidimensional cell growth	-	GO:0005829//cytosol;GO:0009506//plasmodesma;GO:0016020//membrane
Unigene15087_All	3086	GO:0010311//lateral root formation;GO:0009638//phototropism;GO:0048366//leaf development;GO:0045893//positive regulation of transcription, DNA-dependent;GO:0009723//response to ethylene stimulus;GO:0009733//response to auxin stimulus;GO:0009785//blue light signaling pathway	GO:0005515//protein binding;GO:0003677//DNA binding	GO:0005634//nucleus
Unigene16159_All	1175	GO:0009851//auxin biosynthetic process;GO:0009651//response to salt stress;GO:0009617//response to bacterium;GO:0010311//lateral root formation;GO:0009723//response to ethylene stimulus;GO:0000162//tryptophan biosynthetic process	GO:0004049//anthranilate synthase activity	GO:0005739//mitochondrion;GO:0009507//chloroplast
Unigene16300_All	468	GO:0051781//positive regulation of cell division;GO:0010286//heat acclimation;GO:0010311//lateral root formation;GO:0045892//negative regulation of transcription, DNA-dependent;GO:0071365//cellular response to auxin stimulus;GO:0016567//protein ubiquitination;GO:0031146//SCF-dependent proteasomal ubiquitin-dependent protein catabolic process	GO:0005515//protein binding;GO:0004842//ubiquitin-protein ligase activity	GO:0019005//SCF ubiquitin ligase complex;GO:0005634//nucleus
Unigene18689_All	1267	GO:0010218//response to far red light;GO:0007155//cell adhesion;GO:0006949//syncytium formation;GO:0009825//multidimensional cell growth;GO:0045010//actin nucleation;GO:0009958//positive gravitropism;GO:0010311//lateral root formation;GO:0048829//root cap development;GO:0007389//pattern specification process;GO:0009624//response to nematode;GO:0043481//anthocyanin accumulation in tissues in respo…	GO:0010328//auxin influx transmembrane transporter activity;GO:0010011//auxin binding	GO:0005794//Golgi apparatus;GO:0009986//cell surface;GO:0005768//endosome;GO:0005886//plasma membrane
Unigene20484_All	1214	GO:0007155//cell adhesion;GO:0045010//actin nucleation;GO:0010311//lateral root formation;GO:0009734//auxin mediated signaling pathway;GO:0006355//regulation of transcription, DNA-dependent;GO:0009638//phototropism;GO:0010090//trichome morphogenesis;GO:0010583//response to cyclopentenone;GO:0048765//root hair cell differentiation;GO:0048366//leaf development;GO:0009741//response to brassinosteroi…	GO:0046983//protein dimerization activity;GO:0043565//sequence-specific DNA binding;GO:0003700//sequence-specific DNA binding transcription factor activity	GO:0005634//nucleus
Unigene22844_All	2100	GO:0010311//lateral root formation;GO:0048589//developmental growth;GO:0048443//stamen development;GO:0002237//response to molecule of bacterial origin;GO:0010152//pollen maturation;GO:0009734//auxin mediated signaling pathway;GO:0016036//cellular response to phosphate starvation	GO:0000822//inositol hexakisphosphate binding;GO:0010011//auxin binding	GO:0043224//nuclear SCF ubiquitin ligase complex
Unigene22972_All	12336	GO:0009620//response to fungus;GO:0009926//auxin polar transport;GO:0009640//photomorphogenesis;GO:0010311//lateral root formation;GO:0009733//response to auxin stimulus;GO:0016567//protein ubiquitination;GO:0048283//indeterminate inflorescence morphogenesis;GO:0009826//unidimensional cell growth	GO:0008270//zinc ion binding;GO:0004842//ubiquitin-protein ligase activity	GO:0005829//cytosol;GO:0009506//plasmodesma;GO:0016020//membrane
Unigene23019_All	1693	GO:0007000//nucleolus organization;GO:0009786//regulation of asymmetric cell division;GO:0050826//response to freezing;GO:0006521//regulation of cellular amino acid metabolic process;GO:0000911//cytokinesis by cell plate formation;GO:0010311//lateral root formation;GO:0048829//root cap development;GO:0048825//cotyledon development;GO:0009640//photomorphogenesis;GO:0019915//lipid storage;GO:001018…	GO:0019199//transmembrane receptor protein kinase activity;GO:0043168;GO:0042803//protein homodimerization activity	GO:0009507//chloroplast;GO:0005829//cytosol;GO:0009986//cell surface;GO:0030139//endocytic vesicle;GO:0005886//plasma membrane
Unigene24239_All	916	GO:0009620//response to fungus;GO:0009926//auxin polar transport;GO:0009640//photomorphogenesis;GO:0010311//lateral root formation;GO:0009733//response to auxin stimulus;GO:0048283//indeterminate inflorescence morphogenesis;GO:0009826//unidimensional cell growth	-	GO:0005829//cytosol;GO:0009506//plasmodesma;GO:0016020//membrane
Unigene2483_All	1175	GO:0006094//gluconeogenesis;GO:0010311//lateral root formation;GO:0018130;GO:0009617//response to bacterium;GO:0009651//response to salt stress;GO:0006333//chromatin assembly or disassembly;GO:0008283//cell proliferation;GO:0006096//glycolysis;GO:0030154//cell differentiation;GO:0046686//response to cadmium ion;GO:0009409//response to cold;GO:0009738//abscisic acid mediated signaling pathway;GO:0…	GO:0042393//histone binding;GO:0003682//chromatin binding	GO:0009941//chloroplast envelope;GO:0005829//cytosol;GO:0009570//chloroplast stroma;GO:0005886//plasma membrane;GO:0005634//nucleus
Unigene25261_All	505	GO:0010025//wax biosynthetic process;GO:0010143//cutin biosynthetic process;GO:0001676//long-chain fatty acid metabolic process;GO:0050832//defense response to fungus;GO:0010311//lateral root formation	GO:0031957//very long-chain fatty acid-CoA ligase activity;GO:0004467//long-chain fatty acid-CoA ligase activity	-
Unigene28649_All	1283	GO:0010311//lateral root formation;GO:0030154//cell differentiation;GO:0006334//nucleosome assembly;GO:0008283//cell proliferation;GO:0046686//response to cadmium ion	GO:0042393//histone binding;GO:0003677//DNA binding;GO:0003682//chromatin binding	GO:0005737//cytoplasm;GO:0005634//nucleus
Unigene2983_All	262	GO:0006468//protein phosphorylation;GO:0009786//regulation of asymmetric cell division;GO:0010311//lateral root formation;GO:0048829//root cap development;GO:0009793//embryo development ending in seed dormancy	GO:0004674//protein serine/threonine kinase activity;GO:0004872//receptor activity;GO:0005524//ATP binding;GO:0042803//protein homodimerization activity	GO:0030139//endocytic vesicle;GO:0009986//cell surface;GO:0005768//endosome;GO:0005886//plasma membrane
Unigene30874_All	345	GO:0010311//lateral root formation;GO:0009617//response to bacterium;GO:0006333//chromatin assembly or disassembly;GO:0008283//cell proliferation;GO:1901576;GO:0006970//response to osmotic stress;GO:0006006//glucose metabolic process;GO:0009056//catabolic process;GO:0030154//cell differentiation;GO:0046686//response to cadmium ion;GO:0009409//response to cold;GO:0009738//abscisic acid mediated si…	GO:0042393//histone binding;GO:0003682//chromatin binding	GO:0005829//cytosol;GO:0044434;GO:0005634//nucleus
Unigene32163_All	2651	GO:0007000//nucleolus organization;GO:0009786//regulation of asymmetric cell division;GO:0050826//response to freezing;GO:0006521//regulation of cellular amino acid metabolic process;GO:0000911//cytokinesis by cell plate formation;GO:0010311//lateral root formation;GO:0048829//root cap development;GO:0048825//cotyledon development;GO:0009640//photomorphogenesis;GO:0019915//lipid storage;GO:001018…	GO:0019199//transmembrane receptor protein kinase activity;GO:0016597//amino acid binding;GO:0004674//protein serine/threonine kinase activity;GO:0042803//protein homodimerization activity;GO:0005524//ATP binding	GO:0009507//chloroplast;GO:0005829//cytosol;GO:0009986//cell surface;GO:0030139//endocytic vesicle;GO:0005886//plasma membrane
Unigene32217_All	1852	GO:0007000//nucleolus organization;GO:0009786//regulation of asymmetric cell division;GO:0050826//response to freezing;GO:0006521//regulation of cellular amino acid metabolic process;GO:0000911//cytokinesis by cell plate formation;GO:0010311//lateral root formation;GO:0048829//root cap development;GO:0048825//cotyledon development;GO:0009640//photomorphogenesis;GO:0019915//lipid storage;GO:001018…	GO:0019199//transmembrane receptor protein kinase activity;GO:0016597//amino acid binding;GO:0004674//protein serine/threonine kinase activity;GO:0042803//protein homodimerization activity;GO:0005524//ATP binding	GO:0009507//chloroplast;GO:0005829//cytosol;GO:0009986//cell surface;GO:0030139//endocytic vesicle;GO:0005886//plasma membrane
Unigene32719_All	853	GO:0010311//lateral root formation	-	GO:0005634//nucleus
Unigene32839_All	820	GO:0055114//oxidation-reduction process;GO:0009620//response to fungus;GO:0009926//auxin polar transport;GO:0009640//photomorphogenesis;GO:0010073//meristem maintenance;GO:0010311//lateral root formation;GO:0009733//response to auxin stimulus;GO:0048283//indeterminate inflorescence morphogenesis;GO:0009826//unidimensional cell growth;GO:0016036//cellular response to phosphate starvation;GO:008016…	GO:0016682//oxidoreductase activity, acting on diphenols and related substances as donors, oxygen as acceptor;GO:0005507//copper ion binding	GO:0005829//cytosol;GO:0005618//cell wall;GO:0005739//mitochondrion;GO:0009506//plasmodesma;GO:0016023//cytoplasmic membrane-bounded vesicle;GO:0005576//extracellular region;GO:0016020//membrane;GO:0005783//endoplasmic reticulum
Unigene35483_All	545	GO:0010311//lateral root formation	-	GO:0005634//nucleus;GO:0009536//plastid
Unigene38002_All	326	GO:0010025//wax biosynthetic process;GO:0010143//cutin biosynthetic process;GO:0001676//long-chain fatty acid metabolic process;GO:0050832//defense response to fungus;GO:0010311//lateral root formation	GO:0031957//very long-chain fatty acid-CoA ligase activity;GO:0004467//long-chain fatty acid-CoA ligase activity	-
Unigene40740_All	2575	GO:0006511//ubiquitin-dependent protein catabolic process;GO:0010103//stomatal complex morphogenesis;GO:0042752//regulation of circadian rhythm;GO:0010311//lateral root formation;GO:0048443//stamen development;GO:0002237//response to molecule of bacterial origin;GO:0010152//pollen maturation;GO:0009734//auxin mediated signaling pathway;GO:0016036//cellular response to phosphate starvation	GO:0000822//inositol hexakisphosphate binding;GO:0010011//auxin binding;GO:0004842//ubiquitin-protein ligase activity;GO:0005515//protein binding	GO:0019005//SCF ubiquitin ligase complex;GO:0005634//nucleus
Unigene45828_All	244	GO:0010311//lateral root formation	-	GO:0005634//nucleus;GO:0009536//plastid
Unigene46830_All	223	GO:0055114//oxidation-reduction process;GO:0009620//response to fungus;GO:0009926//auxin polar transport;GO:0009640//photomorphogenesis;GO:0010073//meristem maintenance;GO:0010311//lateral root formation;GO:0009733//response to auxin stimulus;GO:0048283//indeterminate inflorescence morphogenesis;GO:0009826//unidimensional cell growth;GO:0016036//cellular response to phosphate starvation;GO:008016…	GO:0016682//oxidoreductase activity, acting on diphenols and related substances as donors, oxygen as acceptor;GO:0005507//copper ion binding	GO:0005829//cytosol;GO:0005618//cell wall;GO:0009506//plasmodesma;GO:0016023//cytoplasmic membrane-bounded vesicle;GO:0005576//extracellular region;GO:0016020//membrane;GO:0005794//Golgi apparatus;GO:0005783//endoplasmic reticulum
Unigene47325_All	211	GO:0055114//oxidation-reduction process;GO:0009620//response to fungus;GO:0009926//auxin polar transport;GO:0009640//photomorphogenesis;GO:0010073//meristem maintenance;GO:0010311//lateral root formation;GO:0009733//response to auxin stimulus;GO:0048283//indeterminate inflorescence morphogenesis;GO:0009826//unidimensional cell growth;GO:0016036//cellular response to phosphate starvation;GO:008016…	GO:0016682//oxidoreductase activity, acting on diphenols and related substances as donors, oxygen as acceptor;GO:0005507//copper ion binding	GO:0005829//cytosol;GO:0005618//cell wall;GO:0009506//plasmodesma;GO:0016023//cytoplasmic membrane-bounded vesicle;GO:0016020//membrane;GO:0005783//endoplasmic reticulum
Unigene52622_All	226	GO:0010025//wax biosynthetic process;GO:0010143//cutin biosynthetic process;GO:0001676//long-chain fatty acid metabolic process;GO:0050832//defense response to fungus;GO:0010311//lateral root formation	GO:0031957//very long-chain fatty acid-CoA ligase activity;GO:0004467//long-chain fatty acid-CoA ligase activity	-
Unigene5828_All	2184	GO:0007000//nucleolus organization;GO:0009786//regulation of asymmetric cell division;GO:0050826//response to freezing;GO:0006521//regulation of cellular amino acid metabolic process;GO:0000911//cytokinesis by cell plate formation;GO:0010311//lateral root formation;GO:0048829//root cap development;GO:0048825//cotyledon development;GO:0009640//photomorphogenesis;GO:0019915//lipid storage;GO:001018…	GO:0019199//transmembrane receptor protein kinase activity;GO:0016597//amino acid binding;GO:0004674//protein serine/threonine kinase activity;GO:0042803//protein homodimerization activity;GO:0005524//ATP binding	GO:0009507//chloroplast;GO:0005829//cytosol;GO:0009986//cell surface;GO:0030139//endocytic vesicle;GO:0005886//plasma membrane
Unigene59664_All	415	GO:0007000//nucleolus organization;GO:0009786//regulation of asymmetric cell division;GO:0050826//response to freezing;GO:0006521//regulation of cellular amino acid metabolic process;GO:0000911//cytokinesis by cell plate formation;GO:0010311//lateral root formation;GO:0048829//root cap development;GO:0048825//cotyledon development;GO:0009640//photomorphogenesis;GO:0019915//lipid storage;GO:001018…	GO:0019199//transmembrane receptor protein kinase activity;GO:0016597//amino acid binding;GO:0004674//protein serine/threonine kinase activity;GO:0042803//protein homodimerization activity;GO:0005524//ATP binding	GO:0009507//chloroplast;GO:0005829//cytosol;GO:0009986//cell surface;GO:0030139//endocytic vesicle;GO:0005886//plasma membrane
Unigene9284_All	2266	GO:0006468//protein phosphorylation;GO:0009786//regulation of asymmetric cell division;GO:0010311//lateral root formation;GO:0048829//root cap development;GO:0009793//embryo development ending in seed dormancy	GO:0004674//protein serine/threonine kinase activity;GO:0004872//receptor activity;GO:0005524//ATP binding;GO:0042803//protein homodimerization activity	GO:0016021//integral to membrane;GO:0030139//endocytic vesicle;GO:0009986//cell surface;GO:0032585//multivesicular body membrane;GO:0005886//plasma membrane
Unigene9565_All	2073	GO:0009926//auxin polar transport;GO:0009733//response to auxin stimulus;GO:0060919;GO:0010311//lateral root formation;GO:0048829//root cap development	GO:0010328//auxin influx transmembrane transporter activity	GO:0016021//integral to membrane
CL11754.Contig3_All	825	GO:0010053//root epidermal cell differentiation;GO:0006002//fructose 6-phosphate metabolic process;GO:0006096//glycolysis;GO:0016310//phosphorylation	GO:0003872//6-phosphofructokinase activity;GO:0047334//diphosphate-fructose-6-phosphate 1-phosphotransferase activity;GO:0005524//ATP binding	GO:0005945//6-phosphofructokinase complex;GO:0005886//plasma membrane
CL11754.Contig4_All	830	GO:0010053//root epidermal cell differentiation;GO:0006002//fructose 6-phosphate metabolic process;GO:0006096//glycolysis;GO:0016310//phosphorylation	GO:0003872//6-phosphofructokinase activity;GO:0047334//diphosphate-fructose-6-phosphate 1-phosphotransferase activity;GO:0005524//ATP binding	GO:0005945//6-phosphofructokinase complex;GO:0005886//plasma membrane
CL11779.Contig2_All	292	GO:0010053//root epidermal cell differentiation;GO:0009408//response to heat;GO:0009060//aerobic respiration;GO:0043069//negative regulation of programmed cell death;GO:0050832//defense response to fungus;GO:0033198//response to ATP	GO:0016174//NAD(P)H oxidase activity;GO:0005509//calcium ion binding;GO:0004601//peroxidase activity	GO:0005773//vacuole;GO:0022626//cytosolic ribosome;GO:0005887//integral to plasma membrane
CL13230.Contig1_All	2179	GO:0009825//multidimensional cell growth;GO:0010053//root epidermal cell differentiation;GO:0006032//chitin catabolic process;GO:0043255//regulation of carbohydrate biosynthetic process;GO:0016998//cell wall macromolecule catabolic process;GO:0009414//response to water deprivation;GO:0009651//response to salt stress;GO:0009735//response to cytokinin stimulus;GO:0009408//response to heat;GO:000980…	GO:0004568//chitinase activity	GO:0016023//cytoplasmic membrane-bounded vesicle;GO:0005886//plasma membrane
CL13269.Contig1_All	966	GO:0006301//postreplication repair;GO:0006511//ubiquitin-dependent protein catabolic process;GO:0010053//root epidermal cell differentiation;GO:0010039//response to iron ion;GO:0016579//protein deubiquitination;GO:0046686//response to cadmium ion	GO:0004842//ubiquitin-protein ligase activity;GO:0005515//protein binding	GO:0005829//cytosol;GO:0031372//UBC13-MMS2 complex;GO:0009507//chloroplast;GO:0005634//nucleus;GO:0005886//plasma membrane
CL13269.Contig2_All	555	GO:0006301//postreplication repair;GO:0006511//ubiquitin-dependent protein catabolic process;GO:0010053//root epidermal cell differentiation;GO:0010039//response to iron ion;GO:0016579//protein deubiquitination;GO:0046686//response to cadmium ion	GO:0004842//ubiquitin-protein ligase activity;GO:0005515//protein binding	GO:0005829//cytosol;GO:0031372//UBC13-MMS2 complex;GO:0005634//nucleus;GO:0005886//plasma membrane
CL13439.Contig2_All	395	GO:0006952//defense response;GO:0015706//nitrate transport;GO:0010053//root epidermal cell differentiation;GO:0009845//seed germination;GO:0010106//cellular response to iron ion starvation;GO:0009408//response to heat;GO:0009060//aerobic respiration;GO:0006826//iron ion transport;GO:0010167//response to nitrate;GO:0033198//response to ATP	GO:0016174//NAD(P)H oxidase activity;GO:0005509//calcium ion binding;GO:0004601//peroxidase activity;GO:0009055//electron carrier activity;GO:0050660//flavin adenine dinucleotide binding;GO:0005506//iron ion binding	GO:0005773//vacuole;GO:0022626//cytosolic ribosome;GO:0005887//integral to plasma membrane
CL14085.Contig1_All	779	GO:0009932//cell tip growth;GO:0010053//root epidermal cell differentiation	GO:0005094//Rho GDP-dissociation inhibitor activity	GO:0009536//plastid
CL14085.Contig2_All	1267	GO:0009932//cell tip growth;GO:0010053//root epidermal cell differentiation	GO:0005094//Rho GDP-dissociation inhibitor activity	GO:0005737//cytoplasm
CL14330.Contig1_All	2943	GO:0010053//root epidermal cell differentiation;GO:0044710;GO:0000902//cell morphogenesis;GO:0044262//cellular carbohydrate metabolic process;GO:0048468//cell development	GO:0008081//phosphoric diester hydrolase activity	GO:0016023//cytoplasmic membrane-bounded vesicle;GO:0005886//plasma membrane
CL14330.Contig2_All	2554	GO:0010053//root epidermal cell differentiation;GO:0044710;GO:0000902//cell morphogenesis;GO:0044262//cellular carbohydrate metabolic process;GO:0048468//cell development	GO:0008081//phosphoric diester hydrolase activity	GO:0016023//cytoplasmic membrane-bounded vesicle;GO:0005886//plasma membrane
CL16317.Contig2_All	3601	GO:0010053//root epidermal cell differentiation;GO:0008152//metabolic process;GO:0048235//pollen sperm cell differentiation	GO:0004558//alpha-glucosidase activity	GO:0016023//cytoplasmic membrane-bounded vesicle;GO:0005886//plasma membrane;GO:0005783//endoplasmic reticulum
CL19150.Contig1_All	1144	GO:0055114//oxidation-reduction process;GO:0006281//DNA repair;GO:0010053//root epidermal cell differentiation;GO:0060151//peroxisome localization;GO:0009932//cell tip growth;GO:0051646//mitochondrion localization;GO:0051645//Golgi localization;GO:0030048//actin filament-based movement	GO:0005509//calcium ion binding;GO:0005515//protein binding;GO:0032440//2-alkenal reductase [NAD(P)] activity	GO:0005737//cytoplasm;GO:0005886//plasma membrane
CL3686.Contig1_All	403	GO:0046854//phosphatidylinositol phosphorylation;GO:0010053//root epidermal cell differentiation	GO:0016491//oxidoreductase activity	-
CL3686.Contig5_All	1071	GO:0046854//phosphatidylinositol phosphorylation;GO:0010053//root epidermal cell differentiation	GO:0016491//oxidoreductase activity	-
CL3686.Contig9_All	2236	GO:0010053//root epidermal cell differentiation;GO:0044710	GO:0016491//oxidoreductase activity	-
CL6431.Contig1_All	1959	GO:0006865//amino acid transport;GO:0000902//cell morphogenesis;GO:0048193//Golgi vesicle transport;GO:0050789//regulation of biological process;GO:0016049//cell growth;GO:0010053//root epidermal cell differentiation	-	GO:0031090//organelle membrane;GO:0044446//intracellular organelle part;GO:0005783//endoplasmic reticulum
CL6431.Contig2_All	2073	GO:0006865//amino acid transport;GO:0000902//cell morphogenesis;GO:0048193//Golgi vesicle transport;GO:0050789//regulation of biological process;GO:0016049//cell growth;GO:0010053//root epidermal cell differentiation	-	GO:0031090//organelle membrane;GO:0044446//intracellular organelle part;GO:0005783//endoplasmic reticulum
CL6431.Contig3_All	2064	GO:0006865//amino acid transport;GO:0000902//cell morphogenesis;GO:0048193//Golgi vesicle transport;GO:0050789//regulation of biological process;GO:0016049//cell growth;GO:0010053//root epidermal cell differentiation	-	GO:0031090//organelle membrane;GO:0044446//intracellular organelle part;GO:0005783//endoplasmic reticulum
CL6431.Contig5_All	2154	GO:0006865//amino acid transport;GO:0000902//cell morphogenesis;GO:0048193//Golgi vesicle transport;GO:0050789//regulation of biological process;GO:0016049//cell growth;GO:0010053//root epidermal cell differentiation	-	GO:0031090//organelle membrane;GO:0044446//intracellular organelle part;GO:0005783//endoplasmic reticulum
CL6431.Contig6_All	2145	GO:0006865//amino acid transport;GO:0000902//cell morphogenesis;GO:0048193//Golgi vesicle transport;GO:0050789//regulation of biological process;GO:0016049//cell growth;GO:0010053//root epidermal cell differentiation	-	GO:0031090//organelle membrane;GO:0044446//intracellular organelle part;GO:0005783//endoplasmic reticulum
CL6431.Contig7_All	1927	GO:0006865//amino acid transport;GO:0000902//cell morphogenesis;GO:0048193//Golgi vesicle transport;GO:0050789//regulation of biological process;GO:0016049//cell growth;GO:0010053//root epidermal cell differentiation	-	GO:0031090//organelle membrane;GO:0044446//intracellular organelle part;GO:0005783//endoplasmic reticulum
CL6431.Contig8_All	1918	GO:0006865//amino acid transport;GO:0000902//cell morphogenesis;GO:0048193//Golgi vesicle transport;GO:0050789//regulation of biological process;GO:0016049//cell growth;GO:0010053//root epidermal cell differentiation	-	GO:0031090//organelle membrane;GO:0044446//intracellular organelle part;GO:0005783//endoplasmic reticulum
CL6431.Contig9_All	2172	GO:0006865//amino acid transport;GO:0000902//cell morphogenesis;GO:0048193//Golgi vesicle transport;GO:0050789//regulation of biological process;GO:0016049//cell growth;GO:0010053//root epidermal cell differentiation	-	GO:0016020//membrane;GO:0043231//intracellular membrane-bounded organelle;GO:0044444//cytoplasmic part
CL8443.Contig1_All	1119	GO:0006301//postreplication repair;GO:0006511//ubiquitin-dependent protein catabolic process;GO:0010053//root epidermal cell differentiation;GO:0010039//response to iron ion;GO:0016579//protein deubiquitination;GO:0046686//response to cadmium ion	GO:0004842//ubiquitin-protein ligase activity;GO:0005515//protein binding	GO:0005829//cytosol;GO:0031372//UBC13-MMS2 complex;GO:0009507//chloroplast;GO:0005634//nucleus;GO:0005886//plasma membrane
CL8492.Contig1_All	2630	GO:0006635//fatty acid beta-oxidation;GO:0010048//vernalization response;GO:0016558//protein import into peroxisome matrix;GO:0000956//nuclear-transcribed mRNA catabolic process;GO:0030036//actin cytoskeleton organization;GO:0006888//ER to Golgi vesicle-mediated transport;GO:0009832//plant-type cell wall biogenesis;GO:0009932//cell tip growth;GO:0010053//root epidermal cell differentiation	GO:0005525//GTP binding;GO:0016817//hydrolase activity, acting on acid anhydrides	GO:0016021//integral to membrane;GO:0005783//endoplasmic reticulum;GO:0005886//plasma membrane;GO:0005634//nucleus
Unigene17520_All	919	GO:0006301//postreplication repair;GO:0006511//ubiquitin-dependent protein catabolic process;GO:0010053//root epidermal cell differentiation;GO:0010039//response to iron ion;GO:0016579//protein deubiquitination;GO:0046686//response to cadmium ion	GO:0004842//ubiquitin-protein ligase activity;GO:0005515//protein binding	GO:0005829//cytosol;GO:0031372//UBC13-MMS2 complex;GO:0009507//chloroplast;GO:0005634//nucleus;GO:0005886//plasma membrane
Unigene19211_All	2743	GO:0010053//root epidermal cell differentiation	-	GO:0009506//plasmodesma;GO:0005768//endosome;GO:0016023//cytoplasmic membrane-bounded vesicle;GO:0046658//anchored to plasma membrane;GO:0005802//trans-Golgi network;GO:0005783//endoplasmic reticulum;GO:0005794//Golgi apparatus
Unigene20109_All	801	GO:0006301//postreplication repair;GO:0006511//ubiquitin-dependent protein catabolic process;GO:0010053//root epidermal cell differentiation;GO:0010039//response to iron ion;GO:0016579//protein deubiquitination;GO:0046686//response to cadmium ion	GO:0004842//ubiquitin-protein ligase activity;GO:0005515//protein binding	GO:0005829//cytosol;GO:0031372//UBC13-MMS2 complex;GO:0009507//chloroplast;GO:0005634//nucleus;GO:0005886//plasma membrane
Unigene22737_All	3400	GO:0006012//galactose metabolic process;GO:0010053//root epidermal cell differentiation;GO:0042546//cell wall biogenesis;GO:0009969//xyloglucan biosynthetic process;GO:0006950//response to stress	GO:0046983//protein dimerization activity;GO:0000166//nucleotide binding;GO:0003978//UDP-glucose 4-epimerase activity;GO:0050662//coenzyme binding	GO:0005829//cytosol;GO:0005795//Golgi stack
Unigene22738_All	3379	GO:0006012//galactose metabolic process;GO:0010053//root epidermal cell differentiation;GO:0042546//cell wall biogenesis;GO:0009969//xyloglucan biosynthetic process;GO:0006950//response to stress	GO:0046983//protein dimerization activity;GO:0000166//nucleotide binding;GO:0003978//UDP-glucose 4-epimerase activity;GO:0050662//coenzyme binding	GO:0005829//cytosol;GO:0005795//Golgi stack
Unigene22739_All	3534	GO:0006012//galactose metabolic process;GO:0010053//root epidermal cell differentiation;GO:0042546//cell wall biogenesis;GO:0009969//xyloglucan biosynthetic process;GO:0006950//response to stress	GO:0046983//protein dimerization activity;GO:0000166//nucleotide binding;GO:0003978//UDP-glucose 4-epimerase activity;GO:0050662//coenzyme binding	GO:0005829//cytosol;GO:0005795//Golgi stack
Unigene22740_All	2511	GO:0006012//galactose metabolic process;GO:0010053//root epidermal cell differentiation;GO:0042546//cell wall biogenesis;GO:0009969//xyloglucan biosynthetic process;GO:0006950//response to stress	GO:0046983//protein dimerization activity;GO:0000166//nucleotide binding;GO:0003978//UDP-glucose 4-epimerase activity;GO:0050662//coenzyme binding	GO:0005829//cytosol;GO:0005795//Golgi stack
Unigene22741_All	3180	GO:0006012//galactose metabolic process;GO:0010053//root epidermal cell differentiation;GO:0042546//cell wall biogenesis;GO:0009969//xyloglucan biosynthetic process;GO:0006950//response to stress	GO:0046983//protein dimerization activity;GO:0000166//nucleotide binding;GO:0003978//UDP-glucose 4-epimerase activity;GO:0050662//coenzyme binding	GO:0005829//cytosol;GO:0005795//Golgi stack
Unigene22742_All	3101	GO:0006012//galactose metabolic process;GO:0010053//root epidermal cell differentiation;GO:0042546//cell wall biogenesis;GO:0009969//xyloglucan biosynthetic process;GO:0006950//response to stress	GO:0046983//protein dimerization activity;GO:0000166//nucleotide binding;GO:0003978//UDP-glucose 4-epimerase activity;GO:0050662//coenzyme binding	GO:0005829//cytosol;GO:0005795//Golgi stack
Unigene22809_All	1962	GO:0006865//amino acid transport;GO:0000902//cell morphogenesis;GO:0048193//Golgi vesicle transport;GO:0050789//regulation of biological process;GO:0016049//cell growth;GO:0010053//root epidermal cell differentiation	-	GO:0016020//membrane;GO:0043231//intracellular membrane-bounded organelle;GO:0044444//cytoplasmic part
Unigene32250_All	2338	GO:0006012//galactose metabolic process;GO:0010053//root epidermal cell differentiation;GO:0042546//cell wall biogenesis;GO:0009969//xyloglucan biosynthetic process;GO:0006950//response to stress	GO:0046983//protein dimerization activity;GO:0000166//nucleotide binding;GO:0003978//UDP-glucose 4-epimerase activity;GO:0050662//coenzyme binding	GO:0005829//cytosol;GO:0005795//Golgi stack
Unigene34801_All	248	GO:0009932//cell tip growth;GO:0010053//root epidermal cell differentiation	GO:0005094//Rho GDP-dissociation inhibitor activity	GO:0005737//cytoplasm
Unigene38747_All	332	GO:0006301//postreplication repair;GO:0006511//ubiquitin-dependent protein catabolic process;GO:0010053//root epidermal cell differentiation;GO:0010039//response to iron ion;GO:0016579//protein deubiquitination;GO:0046686//response to cadmium ion	GO:0004842//ubiquitin-protein ligase activity;GO:0005515//protein binding	GO:0005829//cytosol;GO:0031372//UBC13-MMS2 complex;GO:0009507//chloroplast;GO:0005634//nucleus;GO:0005886//plasma membrane
Unigene39065_All	3412	GO:0010053//root epidermal cell differentiation;GO:0009408//response to heat;GO:0009060//aerobic respiration;GO:0043069//negative regulation of programmed cell death;GO:0050832//defense response to fungus;GO:0033198//response to ATP	GO:0016174//NAD(P)H oxidase activity;GO:0005509//calcium ion binding;GO:0004601//peroxidase activity	GO:0005773//vacuole;GO:0022626//cytosolic ribosome;GO:0005887//integral to plasma membrane
Unigene57486_All	2492	GO:0010053//root epidermal cell differentiation;GO:0009408//response to heat;GO:0009060//aerobic respiration;GO:0043069//negative regulation of programmed cell death;GO:0050832//defense response to fungus;GO:0033198//response to ATP	GO:0016174//NAD(P)H oxidase activity;GO:0005509//calcium ion binding;GO:0004601//peroxidase activity	GO:0005773//vacuole;GO:0022626//cytosolic ribosome;GO:0005887//integral to plasma membrane
Unigene57902_All	244	GO:0006012//galactose metabolic process;GO:0010053//root epidermal cell differentiation;GO:0042546//cell wall biogenesis;GO:0009969//xyloglucan biosynthetic process;GO:0006950//response to stress	GO:0046983//protein dimerization activity;GO:0000166//nucleotide binding;GO:0003978//UDP-glucose 4-epimerase activity;GO:0050662//coenzyme binding	GO:0005829//cytosol;GO:0005795//Golgi stack
Unigene64723_All	1050	GO:0009932//cell tip growth;GO:0010053//root epidermal cell differentiation	GO:0005094//Rho GDP-dissociation inhibitor activity	GO:0009536//plastid
Unigene65301_All	3300	GO:0010053//root epidermal cell differentiation;GO:0009408//response to heat;GO:0009060//aerobic respiration;GO:0043069//negative regulation of programmed cell death;GO:0050832//defense response to fungus;GO:0033198//response to ATP	GO:0016174//NAD(P)H oxidase activity;GO:0005509//calcium ion binding;GO:0004601//peroxidase activity	GO:0005773//vacuole;GO:0022626//cytosolic ribosome;GO:0005887//integral to plasma membrane
Unigene8795_All	370	GO:0010053//root epidermal cell differentiation;GO:0044710;GO:0000902//cell morphogenesis;GO:0044262//cellular carbohydrate metabolic process;GO:0048468//cell development	GO:0008081//phosphoric diester hydrolase activity	GO:0016023//cytoplasmic membrane-bounded vesicle;GO:0005886//plasma membrane
Unigene9040_All	1723	GO:0009825//multidimensional cell growth;GO:0010053//root epidermal cell differentiation;GO:0006032//chitin catabolic process;GO:0043255//regulation of carbohydrate biosynthetic process;GO:0016998//cell wall macromolecule catabolic process;GO:0009414//response to water deprivation;GO:0009651//response to salt stress;GO:0009735//response to cytokinin stimulus;GO:0009408//response to heat;GO:000980…	GO:0004568//chitinase activity	GO:0016023//cytoplasmic membrane-bounded vesicle;GO:0005886//plasma membrane
Unigene9043_All	2148	GO:0009825//multidimensional cell growth;GO:0010053//root epidermal cell differentiation;GO:0006032//chitin catabolic process;GO:0043255//regulation of carbohydrate biosynthetic process;GO:0016998//cell wall macromolecule catabolic process;GO:0009414//response to water deprivation;GO:0009651//response to salt stress;GO:0009735//response to cytokinin stimulus;GO:0009408//response to heat;GO:000980…	GO:0004568//chitinase activity	GO:0016023//cytoplasmic membrane-bounded vesicle;GO:0005886//plasma membrane
Root hair cell differentiation
CL10346.Contig1_All	1945	GO:0043247//telomere maintenance in response to DNA damage;GO:0048589//developmental growth;GO:0010332//response to gamma radiation;GO:0007131//reciprocal meiotic recombination;GO:0007155//cell adhesion;GO:0006944//cellular membrane fusion;GO:0045010//actin nucleation;GO:0032504//multicellular organism reproduction;GO:0045132//meiotic chromosome segregation;GO:0042138//meiotic DNA double-strand b…	GO:0003843//1,3-beta-D-glucan synthase activity	GO:0005794//Golgi apparatus;GO:0009506//plasmodesma;GO:0000148//1,3-beta-D-glucan synthase complex
CL10346.Contig2_All	6256	GO:0043247//telomere maintenance in response to DNA damage;GO:0048589//developmental growth;GO:0010332//response to gamma radiation;GO:0007131//reciprocal meiotic recombination;GO:0007155//cell adhesion;GO:0006944//cellular membrane fusion;GO:0045010//actin nucleation;GO:0032504//multicellular organism reproduction;GO:0045132//meiotic chromosome segregation;GO:0042138//meiotic DNA double-strand b…	GO:0003843//1,3-beta-D-glucan synthase activity	GO:0005794//Golgi apparatus;GO:0009506//plasmodesma;GO:0000148//1,3-beta-D-glucan synthase complex
CL10399.Contig2_All	4643	GO:0009788//negative regulation of abscisic acid mediated signaling pathway;GO:0010467//gene expression;GO:0010026//trichome differentiation;GO:0009651//response to salt stress;GO:0009753//response to jasmonic acid stimulus;GO:0016070//RNA metabolic process;GO:0009751//response to salicylic acid stimulus;GO:0048765//root hair cell differentiation;GO:0010228//vegetative to reproductive phase trans…	GO:0008022//protein C-terminus binding	GO:0005634//nucleus
CL10456.Contig1_All	1802	GO:0045492//xylan biosynthetic process;GO:0007155//cell adhesion;GO:0045010//actin nucleation;GO:0009651//response to salt stress;GO:0016926//protein desumoylation;GO:0010090//trichome morphogenesis;GO:0050665//hydrogen peroxide biosynthetic process;GO:0048765//root hair cell differentiation;GO:0010228//vegetative to reproductive phase transition of meristem;GO:0010413//glucuronoxylan metabolic p…	GO:0016929//SUMO-specific protease activity	GO:0005634//nucleus
CL10545.Contig2_All	1443	GO:0010267//production of ta-siRNAs involved in RNA interference;GO:0006346//methylation-dependent chromatin silencing;GO:0009965//leaf morphogenesis;GO:0048439//flower morphogenesis;GO:0010589//leaf proximal/distal pattern formation;GO:0048765//root hair cell differentiation;GO:0051301//cell division;GO:0006306//DNA methylation;GO:0009926//auxin polar transport;GO:0010072//primary shoot apical m…	GO:0004521//endoribonuclease activity;GO:0035197//siRNA binding;GO:0005515//protein binding;GO:0035198//miRNA binding	GO:0019898//extrinsic to membrane;GO:0005829//cytosol;GO:0005634//nucleus
CL10545.Contig3_All	1308	GO:0010267//production of ta-siRNAs involved in RNA interference;GO:0006346//methylation-dependent chromatin silencing;GO:0009965//leaf morphogenesis;GO:0048439//flower morphogenesis;GO:0010589//leaf proximal/distal pattern formation;GO:0048765//root hair cell differentiation;GO:0051301//cell division;GO:0035019//somatic stem cell maintenance;GO:0006306//DNA methylation;GO:0009926//auxin polar tr…	GO:0004521//endoribonuclease activity;GO:0003743//translation initiation factor activity;GO:0035197//siRNA binding;GO:0005515//protein binding;GO:0035198//miRNA binding	GO:0019898//extrinsic to membrane;GO:0005829//cytosol;GO:0005634//nucleus
CL10545.Contig4_All	1064	GO:0010267//production of ta-siRNAs involved in RNA interference;GO:0006346//methylation-dependent chromatin silencing;GO:0009965//leaf morphogenesis;GO:0048439//flower morphogenesis;GO:0010589//leaf proximal/distal pattern formation;GO:0048765//root hair cell differentiation;GO:0051301//cell division;GO:0006306//DNA methylation;GO:0009926//auxin polar transport;GO:0010072//primary shoot apical m…	GO:0004521//endoribonuclease activity;GO:0035197//siRNA binding;GO:0005515//protein binding;GO:0035198//miRNA binding	GO:0019898//extrinsic to membrane;GO:0005829//cytosol;GO:0005634//nucleus
CL10597.Contig3_All	1259	GO:0048768//root hair cell tip growth;GO:0042742//defense response to bacterium;GO:0001558//regulation of cell growth;GO:0009860//pollen tube growth;GO:0010252//auxin homeostasis;GO:0048527//lateral root development;GO:0008283//cell proliferation;GO:0046686//response to cadmium ion;GO:0040014//regulation of multicellular organism growth;GO:0007346//regulation of mitotic cell cycle;GO:0009790//emb…	-	GO:0009579//thylakoid;GO:0009507//chloroplast;GO:0090406//pollen tube;GO:0005634//nucleus;GO:0005886//plasma membrane;GO:0048046//apoplast
CL10767.Contig1_All	1841	GO:0009926//auxin polar transport;GO:0048589//developmental growth;GO:0048825//cotyledon development;GO:0048527//lateral root development;GO:0048765//root hair cell differentiation;GO:0009630//gravitropism	GO:0004672//protein kinase activity	-
CL10767.Contig3_All	1790	GO:0009926//auxin polar transport;GO:0048589//developmental growth;GO:0048825//cotyledon development;GO:0048527//lateral root development;GO:0048765//root hair cell differentiation;GO:0009630//gravitropism	GO:0004672//protein kinase activity	-
CL1078.Contig1_All	1293	GO:0043247//telomere maintenance in response to DNA damage;GO:0006312//mitotic recombination;GO:0010332//response to gamma radiation;GO:0007131//reciprocal meiotic recombination;GO:0007155//cell adhesion;GO:0045010//actin nucleation;GO:0032504//multicellular organism reproduction;GO:0045132//meiotic chromosome segregation;GO:0042138//meiotic DNA double-strand break formation;GO:0006265//DNA topol…	GO:0005524//ATP binding;GO:0003918//DNA topoisomerase (ATP-hydrolyzing) activity	GO:0005634//nucleus
CL1078.Contig2_All	1358	GO:0043247//telomere maintenance in response to DNA damage;GO:0006312//mitotic recombination;GO:0010332//response to gamma radiation;GO:0007131//reciprocal meiotic recombination;GO:0007155//cell adhesion;GO:0045010//actin nucleation;GO:0032504//multicellular organism reproduction;GO:0045132//meiotic chromosome segregation;GO:0042138//meiotic DNA double-strand break formation;GO:0006265//DNA topol…	GO:0005524//ATP binding;GO:0003918//DNA topoisomerase (ATP-hydrolyzing) activity	GO:0005694//chromosome;GO:0005634//nucleus
CL11090.Contig2_All	3070	GO:0009611//response to wounding;GO:0009620//response to fungus;GO:0009414//response to water deprivation;GO:0015969//guanosine tetraphosphate metabolic process;GO:0009753//response to jasmonic acid stimulus;GO:0016310//phosphorylation;GO:0042538//hyperosmotic salinity response;GO:0048765//root hair cell differentiation;GO:0009695//jasmonic acid biosynthetic process;GO:0009738//abscisic acid medi…	GO:0015297//antiporter activity;GO:0004672//protein kinase activity;GO:0043167//ion binding;GO:0008728//GTP diphosphokinase activity	GO:0009507//chloroplast;GO:0005886//plasma membrane
CL11836.Contig1_All	464	GO:0010090//trichome morphogenesis;GO:0071555//cell wall organization;GO:0010311//lateral root formation;GO:0007155//cell adhesion;GO:0010089//xylem development;GO:0048765//root hair cell differentiation;GO:0045010//actin nucleation;GO:0044036//cell wall macromolecule metabolic process	-	GO:0005634//nucleus
CL11836.Contig2_All	543	GO:0010090//trichome morphogenesis;GO:0071555//cell wall organization;GO:0010311//lateral root formation;GO:0007155//cell adhesion;GO:0010089//xylem development;GO:0048765//root hair cell differentiation;GO:0045010//actin nucleation;GO:0044036//cell wall macromolecule metabolic process	-	GO:0005634//nucleus
CL12256.Contig1_All	1886	GO:0080147//root hair cell development;GO:0006486//protein glycosylation;GO:0052325//cell wall pectin biosynthetic process	GO:0052636//arabinosyltransferase activity	GO:0005768//endosome;GO:0005802//trans-Golgi network;GO:0005783//endoplasmic reticulum;GO:0005794//Golgi apparatus;GO:0005634//nucleus
CL12256.Contig2_All	1749	GO:0080147//root hair cell development;GO:0006486//protein glycosylation;GO:0052325//cell wall pectin biosynthetic process	GO:0052636//arabinosyltransferase activity	GO:0005768//endosome;GO:0005802//trans-Golgi network;GO:0005783//endoplasmic reticulum;GO:0005794//Golgi apparatus;GO:0005634//nucleus
CL12779.Contig1_All	1697	GO:0009793//embryo development ending in seed dormancy;GO:0043481//anthocyanin accumulation in tissues in response to UV light;GO:0019243//methylglyoxal catabolic process to D-lactate;GO:0048765//root hair cell differentiation;GO:0048443//stamen development;GO:0006661//phosphatidylinositol biosynthetic process;GO:0006200//ATP catabolic process;GO:0010090//trichome morphogenesis;GO:0009733//respon…	GO:0010329//auxin efflux transmembrane transporter activity;GO:0005524//ATP binding;GO:0005516//calmodulin binding;GO:0008444//CDP-diacylglycerol-glycerol-3-phosphate 3-phosphatidyltransferase activity;GO:0042626//ATPase activity, coupled to transmembrane movement of substances	GO:0009506//plasmodesma;GO:0009941//chloroplast envelope;GO:0005886//plasma membrane;GO:0016021//integral to membrane;GO:0005739//mitochondrion
CL12779.Contig2_All	1626	GO:0009793//embryo development ending in seed dormancy;GO:0043481//anthocyanin accumulation in tissues in response to UV light;GO:0019243//methylglyoxal catabolic process to D-lactate;GO:0048765//root hair cell differentiation;GO:0048443//stamen development;GO:0006661//phosphatidylinositol biosynthetic process;GO:0006200//ATP catabolic process;GO:0010090//trichome morphogenesis;GO:0009733//respon…	GO:0010329//auxin efflux transmembrane transporter activity;GO:0005524//ATP binding;GO:0005516//calmodulin binding;GO:0008444//CDP-diacylglycerol-glycerol-3-phosphate 3-phosphatidyltransferase activity;GO:0042626//ATPase activity, coupled to transmembrane movement of substances	GO:0009506//plasmodesma;GO:0009941//chloroplast envelope;GO:0005886//plasma membrane;GO:0016021//integral to membrane;GO:0005739//mitochondrion
CL13.Contig1_All	508	GO:0016310//phosphorylation;GO:0048765//root hair cell differentiation	GO:0004672//protein kinase activity;GO:0000166//nucleotide binding	-
CL14262.Contig1_All	384	GO:0006862//nucleotide transport;GO:0030243//cellulose metabolic process;GO:0006944//cellular membrane fusion;GO:0010363//regulation of plant-type hypersensitive response;GO:0015802//basic amino acid transport;GO:0006612//protein targeting to membrane;GO:0043069//negative regulation of programmed cell death;GO:0043090//amino acid import;GO:0030036//actin cytoskeleton organization;GO:0015696//ammo…	GO:0005525//GTP binding;GO:0016817//hydrolase activity, acting on acid anhydrides	GO:0005774//vacuolar membrane;GO:0016021//integral to membrane;GO:0005783//endoplasmic reticulum;GO:0005886//plasma membrane;GO:0005634//nucleus
CL14262.Contig2_All	460	GO:0006862//nucleotide transport;GO:0030243//cellulose metabolic process;GO:0006944//cellular membrane fusion;GO:0010363//regulation of plant-type hypersensitive response;GO:0015802//basic amino acid transport;GO:0006612//protein targeting to membrane;GO:0043069//negative regulation of programmed cell death;GO:0043090//amino acid import;GO:0030036//actin cytoskeleton organization;GO:0015696//ammo…	GO:0005525//GTP binding;GO:0016817//hydrolase activity, acting on acid anhydrides	GO:0005774//vacuolar membrane;GO:0016021//integral to membrane;GO:0005783//endoplasmic reticulum;GO:0005886//plasma membrane;GO:0005634//nucleus
CL1431.Contig1_All	666	GO:0010087//phloem or xylem histogenesis;GO:0006346//methylation-dependent chromatin silencing;GO:0000911//cytokinesis by cell plate formation;GO:0009965//leaf morphogenesis;GO:0051510//regulation of unidimensional cell growth;GO:0043687//post-translational protein modification;GO:0048765//root hair cell differentiation;GO:0032875//regulation of DNA endoreduplication;GO:0006306//DNA methylation;G…	GO:0005515//protein binding	GO:0005634//nucleus
CL1431.Contig2_All	1980	GO:0010087//phloem or xylem histogenesis;GO:0006346//methylation-dependent chromatin silencing;GO:0000911//cytokinesis by cell plate formation;GO:0009965//leaf morphogenesis;GO:0051510//regulation of unidimensional cell growth;GO:0043687//post-translational protein modification;GO:0048765//root hair cell differentiation;GO:0032875//regulation of DNA endoreduplication;GO:0006306//DNA methylation;G…	GO:0005515//protein binding	GO:0005634//nucleus
CL1431.Contig3_All	1976	GO:0010087//phloem or xylem histogenesis;GO:0006346//methylation-dependent chromatin silencing;GO:0000911//cytokinesis by cell plate formation;GO:0009965//leaf morphogenesis;GO:0051510//regulation of unidimensional cell growth;GO:0043687//post-translational protein modification;GO:0048765//root hair cell differentiation;GO:0032875//regulation of DNA endoreduplication;GO:0006306//DNA methylation;G…	GO:0005515//protein binding	GO:0005634//nucleus
CL14678.Contig12_All	1489	GO:0019375//galactolipid biosynthetic process;GO:0007155//cell adhesion;GO:0045010//actin nucleation;GO:0033044//regulation of chromosome organization;GO:0016926//protein desumoylation;GO:0010090//trichome morphogenesis;GO:0050665//hydrogen peroxide biosynthetic process;GO:0048765//root hair cell differentiation;GO:0010228//vegetative to reproductive phase transition of meristem;GO:0009887//organ…	-	GO:0009507//chloroplast;GO:0005741//mitochondrial outer membrane;GO:0043234//protein complex
CL14678.Contig2_All	1473	GO:0019375//galactolipid biosynthetic process;GO:0007155//cell adhesion;GO:0045010//actin nucleation;GO:0033044//regulation of chromosome organization;GO:0016926//protein desumoylation;GO:0010090//trichome morphogenesis;GO:0050665//hydrogen peroxide biosynthetic process;GO:0048765//root hair cell differentiation;GO:0010228//vegetative to reproductive phase transition of meristem;GO:0009887//organ…	-	GO:0009507//chloroplast;GO:0005741//mitochondrial outer membrane;GO:0043234//protein complex
CL15269.Contig1_All	277	GO:0010048//vernalization response;GO:0007155//cell adhesion;GO:0045010//actin nucleation;GO:0006013//mannose metabolic process;GO:0007020//microtubule nucleation;GO:0010090//trichome morphogenesis;GO:0048765//root hair cell differentiation;GO:0019344//cysteine biosynthetic process;GO:0071555//cell wall organization	GO:0030246//carbohydrate binding;GO:0008270//zinc ion binding;GO:0004559//alpha-mannosidase activity	GO:0005774//vacuolar membrane;GO:0048046//apoplast;GO:0016023//cytoplasmic membrane-bounded vesicle;GO:0009505//plant-type cell wall;GO:0009507//chloroplast;GO:0005829//cytosol;GO:0005886//plasma membrane
CL1529.Contig3_All	584	GO:0048587//regulation of short-day photoperiodism, flowering;GO:0007155//cell adhesion;GO:0009793//embryo development ending in seed dormancy;GO:0045010//actin nucleation;GO:0016926//protein desumoylation;GO:0010090//trichome morphogenesis;GO:0050665//hydrogen peroxide biosynthetic process;GO:0048765//root hair cell differentiation;GO:0071555//cell wall organization	GO:0035064//methylated histone residue binding	GO:0009506//plasmodesma;GO:0031519//PcG protein complex
CL15570.Contig1_All	6296	GO:0000278//mitotic cell cycle;GO:0007155//cell adhesion;GO:0009793//embryo development ending in seed dormancy;GO:0009910//negative regulation of flower development;GO:0045010//actin nucleation;GO:0048453//sepal formation;GO:0042742//defense response to bacterium;GO:0003002//regionalization;GO:0010090//trichome morphogenesis;GO:0048451//petal formation;GO:0048765//root hair cell differentiation;…	GO:0005515//protein binding;GO:0004386//helicase activity;GO:0003677//DNA binding;GO:0005524//ATP binding	GO:0016514//SWI/SNF complex;GO:0005618//cell wall
CL15570.Contig2_All	7133	GO:0000278//mitotic cell cycle;GO:0007155//cell adhesion;GO:0009793//embryo development ending in seed dormancy;GO:0009910//negative regulation of flower development;GO:0045010//actin nucleation;GO:0048453//sepal formation;GO:0042742//defense response to bacterium;GO:0003002//regionalization;GO:0010090//trichome morphogenesis;GO:0048451//petal formation;GO:0048765//root hair cell differentiation;…	GO:0005515//protein binding;GO:0004386//helicase activity;GO:0003677//DNA binding;GO:0005524//ATP binding	GO:0016514//SWI/SNF complex;GO:0005618//cell wall
CL1617.Contig1_All	2632	GO:0009611//response to wounding;GO:0009620//response to fungus;GO:0009414//response to water deprivation;GO:0009753//response to jasmonic acid stimulus;GO:0042538//hyperosmotic salinity response;GO:0048765//root hair cell differentiation;GO:0009695//jasmonic acid biosynthetic process;GO:0009738//abscisic acid mediated signaling pathway;GO:0009723//response to ethylene stimulus;GO:0009733//respon…	GO:0004672//protein kinase activity;GO:0022857//transmembrane transporter activity;GO:0008728//GTP diphosphokinase activity	GO:0009507//chloroplast;GO:0005886//plasma membrane
CL16586.Contig1_All	5217	GO:0009908//flower development;GO:0007155//cell adhesion;GO:0009793//embryo development ending in seed dormancy;GO:0006357//regulation of transcription from RNA polymerase II promoter;GO:0045010//actin nucleation;GO:0048573//photoperiodism, flowering;GO:0009294//DNA mediated transformation;GO:0006473//protein acetylation;GO:0010090//trichome morphogenesis;GO:0048765//root hair cell differentiatio…	GO:0004402//histone acetyltransferase activity	-
CL16586.Contig3_All	5313	GO:0009908//flower development;GO:0007155//cell adhesion;GO:0009793//embryo development ending in seed dormancy;GO:0006357//regulation of transcription from RNA polymerase II promoter;GO:0045010//actin nucleation;GO:0048573//photoperiodism, flowering;GO:0009294//DNA mediated transformation;GO:0006473//protein acetylation;GO:0010090//trichome morphogenesis;GO:0048765//root hair cell differentiatio…	GO:0004402//histone acetyltransferase activity	-
CL16785.Contig2_All	640	GO:0050896//response to stimulus;GO:0050789//regulation of biological process;GO:0044765;GO:0048589//developmental growth;GO:0048765//root hair cell differentiation;GO:0007389//pattern specification process	-	GO:0044425//membrane part;GO:0005886//plasma membrane
CL16991.Contig1_All	464	GO:0009908//flower development;GO:0048827//phyllome development;GO:0016310//phosphorylation;GO:0048765//root hair cell differentiation;GO:0009628//response to abiotic stimulus;GO:2000012//regulation of auxin polar transport;GO:0009733//response to auxin stimulus	GO:0005515//protein binding;GO:0000166//nucleotide binding;GO:0004674//protein serine/threonine kinase activity	GO:0009536//plastid
CL17527.Contig2_All	1961	GO:0048467//gynoecium development;GO:0048768//root hair cell tip growth;GO:0060151//peroxisome localization;GO:0010154//fruit development;GO:0051301//cell division;GO:0090436//leaf pavement cell development;GO:0051646//mitochondrion localization;GO:0010091//trichome branching;GO:0051645//Golgi localization;GO:0030048//actin filament-based movement	GO:0005524//ATP binding;GO:0003774//motor activity;GO:0003779//actin binding	GO:0016459//myosin complex;GO:0009506//plasmodesma;GO:0005773//vacuole
CL17527.Contig5_All	271	GO:0048768//root hair cell tip growth;GO:0006278//RNA-dependent DNA replication;GO:0060151//peroxisome localization;GO:0010154//fruit development;GO:0051301//cell division;GO:0009791//post-embryonic development;GO:0051646//mitochondrion localization;GO:0010091//trichome branching;GO:0051645//Golgi localization	GO:0003723//RNA binding;GO:0003964//RNA-directed DNA polymerase activity;GO:0042802//identical protein binding;GO:0005524//ATP binding;GO:0003774//motor activity;GO:0003779//actin binding	GO:0016459//myosin complex;GO:0005773//vacuole
CL1782.Contig11_All	2350	GO:0010267//production of ta-siRNAs involved in RNA interference;GO:0006346//methylation-dependent chromatin silencing;GO:0009965//leaf morphogenesis;GO:0048439//flower morphogenesis;GO:0010589//leaf proximal/distal pattern formation;GO:0048765//root hair cell differentiation;GO:0051301//cell division;GO:0006306//DNA methylation;GO:0009926//auxin polar transport;GO:0010072//primary shoot apical m…	GO:0004521//endoribonuclease activity;GO:0003743//translation initiation factor activity;GO:0035197//siRNA binding;GO:0005515//protein binding;GO:0035198//miRNA binding	GO:0019898//extrinsic to membrane;GO:0005829//cytosol;GO:0005634//nucleus
CL1782.Contig12_All	3161	GO:0010267//production of ta-siRNAs involved in RNA interference;GO:0006346//methylation-dependent chromatin silencing;GO:0009965//leaf morphogenesis;GO:0048439//flower morphogenesis;GO:0010589//leaf proximal/distal pattern formation;GO:0048765//root hair cell differentiation;GO:0051301//cell division;GO:0006306//DNA methylation;GO:0009926//auxin polar transport;GO:0010072//primary shoot apical m…	GO:0004521//endoribonuclease activity;GO:0035197//siRNA binding;GO:0005515//protein binding;GO:0035198//miRNA binding	GO:0019898//extrinsic to membrane;GO:0005829//cytosol;GO:0005634//nucleus
CL1782.Contig13_All	3292	GO:0010267//production of ta-siRNAs involved in RNA interference;GO:0006346//methylation-dependent chromatin silencing;GO:0009965//leaf morphogenesis;GO:0048439//flower morphogenesis;GO:0010589//leaf proximal/distal pattern formation;GO:0048765//root hair cell differentiation;GO:0051301//cell division;GO:0006306//DNA methylation;GO:0009926//auxin polar transport;GO:0010072//primary shoot apical m…	GO:0004521//endoribonuclease activity;GO:0035197//siRNA binding;GO:0005515//protein binding;GO:0035198//miRNA binding	GO:0019898//extrinsic to membrane;GO:0005829//cytosol;GO:0005634//nucleus
CL17896.Contig1_All	5281	GO:0010102//lateral root morphogenesis;GO:0045595//regulation of cell differentiation;GO:0016049//cell growth;GO:0010090//trichome morphogenesis;GO:0071555//cell wall organization;GO:0010014//meristem initiation;GO:0009733//response to auxin stimulus;GO:0048589//developmental growth;GO:0007155//cell adhesion;GO:0048765//root hair cell differentiation;GO:0045010//actin nucleation	-	GO:0009506//plasmodesma;GO:0005634//nucleus;GO:0005886//plasma membrane
CL17896.Contig2_All	5288	GO:0010102//lateral root morphogenesis;GO:0045595//regulation of cell differentiation;GO:0016049//cell growth;GO:0010090//trichome morphogenesis;GO:0071555//cell wall organization;GO:0010014//meristem initiation;GO:0009733//response to auxin stimulus;GO:0048589//developmental growth;GO:0007155//cell adhesion;GO:0048765//root hair cell differentiation;GO:0045010//actin nucleation	-	GO:0009506//plasmodesma;GO:0005634//nucleus;GO:0005886//plasma membrane
CL18098.Contig1_All	3525	GO:0009965//leaf morphogenesis;GO:0048439//flower morphogenesis;GO:0010051//xylem and phloem pattern formation;GO:0048765//root hair cell differentiation;GO:0048519//negative regulation of biological process;GO:0016049//cell growth;GO:0033044//regulation of chromosome organization;GO:0048449//floral organ formation;GO:0010090//trichome morphogenesis;GO:0010014//meristem initiation;GO:0009733//res…	GO:0004672//protein kinase activity;GO:0035091//phosphatidylinositol binding;GO:0008060//ARF GTPase activator activity;GO:0008270//zinc ion binding;GO:0005515//protein binding;GO:0005524//ATP binding	GO:0030139//endocytic vesicle;GO:0030140//trans-Golgi network transport vesicle;GO:0005829//cytosol;GO:0005886//plasma membrane
CL18098.Contig2_All	2039	GO:0009965//leaf morphogenesis;GO:0048439//flower morphogenesis;GO:0010051//xylem and phloem pattern formation;GO:0048765//root hair cell differentiation;GO:0048519//negative regulation of biological process;GO:0016049//cell growth;GO:0033044//regulation of chromosome organization;GO:0048449//floral organ formation;GO:0010090//trichome morphogenesis;GO:0010014//meristem initiation;GO:0009733//res…	GO:0004672//protein kinase activity;GO:0035091//phosphatidylinositol binding;GO:0008060//ARF GTPase activator activity;GO:0008270//zinc ion binding;GO:0005515//protein binding;GO:0005524//ATP binding	GO:0030139//endocytic vesicle;GO:0030140//trans-Golgi network transport vesicle;GO:0005829//cytosol;GO:0005886//plasma membrane
CL18098.Contig3_All	3563	GO:0009965//leaf morphogenesis;GO:0048439//flower morphogenesis;GO:0010051//xylem and phloem pattern formation;GO:0048765//root hair cell differentiation;GO:0048519//negative regulation of biological process;GO:0016049//cell growth;GO:0033044//regulation of chromosome organization;GO:0048449//floral organ formation;GO:0010090//trichome morphogenesis;GO:0010014//meristem initiation;GO:0009733//res…	GO:0004672//protein kinase activity;GO:0035091//phosphatidylinositol binding;GO:0008060//ARF GTPase activator activity;GO:0008270//zinc ion binding;GO:0005515//protein binding;GO:0005524//ATP binding	GO:0030139//endocytic vesicle;GO:0030140//trans-Golgi network transport vesicle;GO:0005829//cytosol;GO:0005886//plasma membrane
CL18238.Contig1_All	1147	GO:0042335//cuticle development;GO:0006473//protein acetylation;GO:0006355//regulation of transcription, DNA-dependent;GO:0043481//anthocyanin accumulation in tissues in response to UV light;GO:0048765//root hair cell differentiation	GO:0043565//sequence-specific DNA binding;GO:0003700//sequence-specific DNA binding transcription factor activity;GO:0050692//DBD domain binding	GO:0005634//nucleus
CL19360.Contig1_All	2389	GO:0080147//root hair cell development;GO:0009860//pollen tube growth;GO:0016310//phosphorylation;GO:0009793//embryo development ending in seed dormancy	GO:0005089//Rho guanyl-nucleotide exchange factor activity;GO:0016301//kinase activity	GO:0005737//cytoplasm;GO:0005634//nucleus;GO:0005886//plasma membrane
CL19503.Contig1_All	4341	GO:0000278//mitotic cell cycle;GO:0050826//response to freezing;GO:0007155//cell adhesion;GO:0009793//embryo development ending in seed dormancy;GO:0045010//actin nucleation;GO:0048449//floral organ formation;GO:0009640//photomorphogenesis;GO:0019915//lipid storage;GO:0010051//xylem and phloem pattern formation;GO:0010182//sugar mediated signaling pathway;GO:0010090//trichome morphogenesis;GO:000…	GO:0005515//protein binding	GO:0005618//cell wall;GO:0005829//cytosol;GO:0005886//plasma membrane;GO:0005634//nucleus
CL19503.Contig2_All	2087	GO:0000278//mitotic cell cycle;GO:0050826//response to freezing;GO:0007155//cell adhesion;GO:0009793//embryo development ending in seed dormancy;GO:0045010//actin nucleation;GO:0048449//floral organ formation;GO:0009640//photomorphogenesis;GO:0019915//lipid storage;GO:0010051//xylem and phloem pattern formation;GO:0010182//sugar mediated signaling pathway;GO:0010090//trichome morphogenesis;GO:000…	GO:0005515//protein binding	GO:0005618//cell wall;GO:0005829//cytosol;GO:0005886//plasma membrane;GO:0005634//nucleus
CL19503.Contig3_All	3093	GO:0000278//mitotic cell cycle;GO:0050826//response to freezing;GO:0007155//cell adhesion;GO:0009793//embryo development ending in seed dormancy;GO:0045010//actin nucleation;GO:0048449//floral organ formation;GO:0009640//photomorphogenesis;GO:0019915//lipid storage;GO:0010051//xylem and phloem pattern formation;GO:0010182//sugar mediated signaling pathway;GO:0010090//trichome morphogenesis;GO:000…	GO:0005515//protein binding	GO:0005618//cell wall;GO:0005829//cytosol;GO:0005886//plasma membrane;GO:0005634//nucleus
CL1972.Contig4_All	3298	GO:0060919;GO:0009958//positive gravitropism;GO:0010311//lateral root formation;GO:0048829//root cap development;GO:0048765//root hair cell differentiation;GO:0001736//establishment of planar polarity;GO:0009734//auxin mediated signaling pathway;GO:0009624//response to nematode;GO:0006865//amino acid transport	GO:0010328//auxin influx transmembrane transporter activity;GO:0015293//symporter activity;GO:0010011//auxin binding	GO:0016021//integral to membrane;GO:0009986//cell surface;GO:0005768//endosome;GO:0005794//Golgi apparatus;GO:0005886//plasma membrane
CL1972.Contig6_All	2441	GO:0060919;GO:0009958//positive gravitropism;GO:0010311//lateral root formation;GO:0048829//root cap development;GO:0048765//root hair cell differentiation;GO:0001736//establishment of planar polarity;GO:0009734//auxin mediated signaling pathway;GO:0009624//response to nematode;GO:0006865//amino acid transport	GO:0010328//auxin influx transmembrane transporter activity;GO:0015293//symporter activity;GO:0010011//auxin binding	GO:0016021//integral to membrane;GO:0009986//cell surface;GO:0005768//endosome;GO:0005794//Golgi apparatus;GO:0005886//plasma membrane
CL1972.Contig8_All	2970	GO:0060919;GO:0009958//positive gravitropism;GO:0010311//lateral root formation;GO:0048829//root cap development;GO:0048765//root hair cell differentiation;GO:0001736//establishment of planar polarity;GO:0009734//auxin mediated signaling pathway;GO:0009624//response to nematode;GO:0006865//amino acid transport	GO:0010328//auxin influx transmembrane transporter activity;GO:0015293//symporter activity;GO:0010011//auxin binding	GO:0016021//integral to membrane;GO:0009986//cell surface;GO:0005768//endosome;GO:0005794//Golgi apparatus;GO:0005886//plasma membrane
CL2401.Contig5_All	1059	GO:0015819//lysine transport;GO:0048589//developmental growth;GO:0010106//cellular response to iron ion starvation;GO:0015706//nitrate transport;GO:0006826//iron ion transport;GO:0015808//L-alanine transport;GO:0015813//L-glutamate transport;GO:0048527//lateral root development;GO:0003333//amino acid transmembrane transport;GO:0048765//root hair cell differentiation;GO:0010167//response to nitrat…	GO:0015189//L-lysine transmembrane transporter activity;GO:0016740//transferase activity;GO:0005313//L-glutamate transmembrane transporter activity;GO:0015180//L-alanine transmembrane transporter activity;GO:0015185//gamma-aminobutyric acid transmembrane transporter activity;GO:0003996//acyl-CoA ligase activity;GO:0015181//arginine transmembrane transporter activity	GO:0016021//integral to membrane;GO:0005783//endoplasmic reticulum;GO:0005634//nucleus;GO:0005739//mitochondrion
CL2401.Contig6_All	772	GO:0015819//lysine transport;GO:0048589//developmental growth;GO:0010106//cellular response to iron ion starvation;GO:0015706//nitrate transport;GO:0006826//iron ion transport;GO:0015808//L-alanine transport;GO:0015813//L-glutamate transport;GO:0048527//lateral root development;GO:0003333//amino acid transmembrane transport;GO:0048765//root hair cell differentiation;GO:0010167//response to nitrat…	GO:0015189//L-lysine transmembrane transporter activity;GO:0016740//transferase activity;GO:0005313//L-glutamate transmembrane transporter activity;GO:0015180//L-alanine transmembrane transporter activity;GO:0015185//gamma-aminobutyric acid transmembrane transporter activity;GO:0003996//acyl-CoA ligase activity;GO:0015181//arginine transmembrane transporter activity	GO:0016021//integral to membrane;GO:0005783//endoplasmic reticulum;GO:0005634//nucleus;GO:0005739//mitochondrion
CL2401.Contig7_All	952	GO:0015819//lysine transport;GO:0048589//developmental growth;GO:0010106//cellular response to iron ion starvation;GO:0015706//nitrate transport;GO:0006826//iron ion transport;GO:0015808//L-alanine transport;GO:0015813//L-glutamate transport;GO:0048527//lateral root development;GO:0003333//amino acid transmembrane transport;GO:0048765//root hair cell differentiation;GO:0010167//response to nitrat…	GO:0015189//L-lysine transmembrane transporter activity;GO:0016740//transferase activity;GO:0005313//L-glutamate transmembrane transporter activity;GO:0015180//L-alanine transmembrane transporter activity;GO:0015185//gamma-aminobutyric acid transmembrane transporter activity;GO:0003996//acyl-CoA ligase activity;GO:0015181//arginine transmembrane transporter activity	GO:0016021//integral to membrane;GO:0005783//endoplasmic reticulum;GO:0005634//nucleus;GO:0005739//mitochondrion
CL2524.Contig2_All	4888	GO:0000278//mitotic cell cycle;GO:0048589//developmental growth;GO:0007155//cell adhesion;GO:0009825//multidimensional cell growth;GO:0045010//actin nucleation;GO:0048449//floral organ formation;GO:0003002//regionalization;GO:0010090//trichome morphogenesis;GO:0048765//root hair cell differentiation;GO:0045595//regulation of cell differentiation;GO:0010014//meristem initiation;GO:0045893//positiv…	GO:0005515//protein binding	GO:0031209//SCAR complex;GO:0005886//plasma membrane
CL2524.Contig4_All	4868	GO:0000278//mitotic cell cycle;GO:0048589//developmental growth;GO:0007155//cell adhesion;GO:0009825//multidimensional cell growth;GO:0045010//actin nucleation;GO:0048449//floral organ formation;GO:0003002//regionalization;GO:0010090//trichome morphogenesis;GO:0048765//root hair cell differentiation;GO:0045595//regulation of cell differentiation;GO:0010014//meristem initiation;GO:0045893//positiv…	GO:0005515//protein binding	GO:0031209//SCAR complex;GO:0005886//plasma membrane
CL2817.Contig1_All	4643	GO:0048768//root hair cell tip growth;GO:0006661//phosphatidylinositol biosynthetic process;GO:0009860//pollen tube growth;GO:0016310//phosphorylation	GO:0017137//Rab GTPase binding;GO:0004430//1-phosphatidylinositol 4-kinase activity;GO:0043424//protein histidine kinase binding	GO:0005829//cytosol;GO:0030659//cytoplasmic vesicle membrane;GO:0035619//root hair tip;GO:0009507//chloroplast;GO:0005634//nucleus
CL2984.Contig1_All	6933	GO:0010507//negative regulation of autophagy;GO:0030307//positive regulation of cell growth;GO:0009880//embryonic pattern specification;GO:0007131//reciprocal meiotic recombination;GO:0010431//seed maturation;GO:0007155//cell adhesion;GO:0000911//cytokinesis by cell plate formation;GO:0045010//actin nucleation;GO:0045132//meiotic chromosome segregation;GO:0033044//regulation of chromosome organiz…	GO:0016303//1-phosphatidylinositol-3-kinase activity;GO:0008144//drug binding;GO:0043621//protein self-association;GO:0042802//identical protein binding;GO:0000975//regulatory region DNA binding;GO:0005524//ATP binding	GO:0005737//cytoplasm;GO:0005886//plasma membrane;GO:0005634//nucleus
CL2984.Contig2_All	8055	GO:0010507//negative regulation of autophagy;GO:0030307//positive regulation of cell growth;GO:0009880//embryonic pattern specification;GO:0007131//reciprocal meiotic recombination;GO:0010431//seed maturation;GO:0007155//cell adhesion;GO:0000911//cytokinesis by cell plate formation;GO:0045010//actin nucleation;GO:0045132//meiotic chromosome segregation;GO:0033044//regulation of chromosome organiz…	GO:0016303//1-phosphatidylinositol-3-kinase activity;GO:0008144//drug binding;GO:0043621//protein self-association;GO:0042802//identical protein binding;GO:0000975//regulatory region DNA binding;GO:0005524//ATP binding	GO:0005737//cytoplasm;GO:0005886//plasma membrane;GO:0005634//nucleus
CL2984.Contig3_All	8295	GO:0010507//negative regulation of autophagy;GO:0030307//positive regulation of cell growth;GO:0009880//embryonic pattern specification;GO:0007131//reciprocal meiotic recombination;GO:0010431//seed maturation;GO:0007155//cell adhesion;GO:0000911//cytokinesis by cell plate formation;GO:0045010//actin nucleation;GO:0045132//meiotic chromosome segregation;GO:0033044//regulation of chromosome organiz…	GO:0016303//1-phosphatidylinositol-3-kinase activity;GO:0008144//drug binding;GO:0043621//protein self-association;GO:0042802//identical protein binding;GO:0000975//regulatory region DNA binding;GO:0005524//ATP binding	GO:0005737//cytoplasm;GO:0005886//plasma membrane;GO:0005634//nucleus
CL2984.Contig4_All	4609	GO:0010507//negative regulation of autophagy;GO:0030307//positive regulation of cell growth;GO:0009880//embryonic pattern specification;GO:0007131//reciprocal meiotic recombination;GO:0010431//seed maturation;GO:0007155//cell adhesion;GO:0000911//cytokinesis by cell plate formation;GO:0045010//actin nucleation;GO:0045132//meiotic chromosome segregation;GO:0033044//regulation of chromosome organiz…	GO:0016303//1-phosphatidylinositol-3-kinase activity;GO:0008144//drug binding;GO:0043621//protein self-association;GO:0004674//protein serine/threonine kinase activity;GO:0042802//identical protein binding;GO:0000975//regulatory region DNA binding;GO:0005524//ATP binding	GO:0005737//cytoplasm;GO:0005886//plasma membrane;GO:0005634//nucleus
CL3369.Contig1_All	2726	GO:0010182//sugar mediated signaling pathway;GO:0009793//embryo development ending in seed dormancy;GO:0006406//mRNA export from nucleus;GO:0043687//post-translational protein modification;GO:0048765//root hair cell differentiation;GO:0016579//protein deubiquitination;GO:0010332//response to gamma radiation;GO:0050826//response to freezing;GO:0048443//stamen development;GO:0006306//DNA methylatio…	GO:0042393//histone binding;GO:0003682//chromatin binding;GO:0003755//peptidyl-prolyl cis-trans isomerase activity	GO:0080008//Cul4-RING ubiquitin ligase complex;GO:0005634//nucleus
CL3369.Contig2_All	2638	GO:0010182//sugar mediated signaling pathway;GO:0009793//embryo development ending in seed dormancy;GO:0006406//mRNA export from nucleus;GO:0043687//post-translational protein modification;GO:0048765//root hair cell differentiation;GO:0016579//protein deubiquitination;GO:0010332//response to gamma radiation;GO:0050826//response to freezing;GO:0048443//stamen development;GO:0006306//DNA methylatio…	GO:0042393//histone binding;GO:0003682//chromatin binding;GO:0003755//peptidyl-prolyl cis-trans isomerase activity	GO:0080008//Cul4-RING ubiquitin ligase complex;GO:0005634//nucleus
CL3369.Contig3_All	2606	GO:0010182//sugar mediated signaling pathway;GO:0009793//embryo development ending in seed dormancy;GO:0006406//mRNA export from nucleus;GO:0043687//post-translational protein modification;GO:0048765//root hair cell differentiation;GO:0016579//protein deubiquitination;GO:0010332//response to gamma radiation;GO:0050826//response to freezing;GO:0048443//stamen development;GO:0006306//DNA methylatio…	GO:0042393//histone binding;GO:0003682//chromatin binding;GO:0003755//peptidyl-prolyl cis-trans isomerase activity	GO:0080008//Cul4-RING ubiquitin ligase complex;GO:0005634//nucleus
CL3369.Contig5_All	2431	GO:0010182//sugar mediated signaling pathway;GO:0009793//embryo development ending in seed dormancy;GO:0006406//mRNA export from nucleus;GO:0043687//post-translational protein modification;GO:0048765//root hair cell differentiation;GO:0016579//protein deubiquitination;GO:0010332//response to gamma radiation;GO:0050826//response to freezing;GO:0048443//stamen development;GO:0006306//DNA methylatio…	GO:0042393//histone binding;GO:0003682//chromatin binding;GO:0003755//peptidyl-prolyl cis-trans isomerase activity	GO:0080008//Cul4-RING ubiquitin ligase complex;GO:0005634//nucleus
CL3469.Contig1_All	1127	GO:0019375//galactolipid biosynthetic process;GO:0007155//cell adhesion;GO:0045010//actin nucleation;GO:0033044//regulation of chromosome organization;GO:0016926//protein desumoylation;GO:0010090//trichome morphogenesis;GO:0050665//hydrogen peroxide biosynthetic process;GO:0048765//root hair cell differentiation;GO:0010228//vegetative to reproductive phase transition of meristem;GO:0009887//organ…	-	GO:0009507//chloroplast;GO:0005741//mitochondrial outer membrane;GO:0043234//protein complex
CL3469.Contig2_All	2308	GO:0019375//galactolipid biosynthetic process;GO:0007155//cell adhesion;GO:0045010//actin nucleation;GO:0033044//regulation of chromosome organization;GO:0016926//protein desumoylation;GO:0010090//trichome morphogenesis;GO:0050665//hydrogen peroxide biosynthetic process;GO:0048765//root hair cell differentiation;GO:0010228//vegetative to reproductive phase transition of meristem;GO:0009887//organ…	-	GO:0009507//chloroplast;GO:0005741//mitochondrial outer membrane;GO:0043234//protein complex
CL3469.Contig4_All	388	GO:0019375//galactolipid biosynthetic process;GO:0007155//cell adhesion;GO:0045010//actin nucleation;GO:0033044//regulation of chromosome organization;GO:0016926//protein desumoylation;GO:0010090//trichome morphogenesis;GO:0050665//hydrogen peroxide biosynthetic process;GO:0048765//root hair cell differentiation;GO:0010228//vegetative to reproductive phase transition of meristem;GO:0009887//organ…	-	GO:0005741//mitochondrial outer membrane;GO:0043234//protein complex
CL3469.Contig5_All	717	GO:0019375//galactolipid biosynthetic process;GO:0007155//cell adhesion;GO:0045010//actin nucleation;GO:0033044//regulation of chromosome organization;GO:0016926//protein desumoylation;GO:0010090//trichome morphogenesis;GO:0050665//hydrogen peroxide biosynthetic process;GO:0048765//root hair cell differentiation;GO:0010228//vegetative to reproductive phase transition of meristem;GO:0009887//organ…	-	GO:0009507//chloroplast;GO:0005741//mitochondrial outer membrane;GO:0043234//protein complex
CL3469.Contig6_All	1110	GO:0019375//galactolipid biosynthetic process;GO:0007155//cell adhesion;GO:0045010//actin nucleation;GO:0033044//regulation of chromosome organization;GO:0016926//protein desumoylation;GO:0010090//trichome morphogenesis;GO:0050665//hydrogen peroxide biosynthetic process;GO:0048765//root hair cell differentiation;GO:0010228//vegetative to reproductive phase transition of meristem;GO:0009887//organ…	-	GO:0009507//chloroplast;GO:0005741//mitochondrial outer membrane;GO:0043234//protein complex
CL3543.Contig1_All	444	GO:0045492//xylan biosynthetic process;GO:0002679//respiratory burst involved in defense response;GO:0010200//response to chitin;GO:0010106//cellular response to iron ion starvation;GO:0015706//nitrate transport;GO:0006826//iron ion transport;GO:0015824//proline transport;GO:0007169//transmembrane receptor protein tyrosine kinase signaling pathway;GO:0010043//response to zinc ion;GO:0006468//prot…	GO:0004674//protein serine/threonine kinase activity;GO:0005524//ATP binding	GO:0005576//extracellular region;GO:0009506//plasmodesma;GO:0005886//plasma membrane;GO:0005634//nucleus;GO:0005739//mitochondrion
CL3543.Contig6_All	445	GO:0045492//xylan biosynthetic process;GO:0002679//respiratory burst involved in defense response;GO:0010200//response to chitin;GO:0010106//cellular response to iron ion starvation;GO:0015706//nitrate transport;GO:0006826//iron ion transport;GO:0015824//proline transport;GO:0007169//transmembrane receptor protein tyrosine kinase signaling pathway;GO:0010043//response to zinc ion;GO:0006468//prot…	GO:0004674//protein serine/threonine kinase activity;GO:0005524//ATP binding	GO:0005576//extracellular region;GO:0009506//plasmodesma;GO:0005886//plasma membrane;GO:0005634//nucleus
CL3636.Contig5_All	3577	GO:0009791//post-embryonic development;GO:0048765//root hair cell differentiation;GO:0016043//cellular component organization;GO:0006464//cellular protein modification process;GO:0050794//regulation of cellular process	GO:0016301//kinase activity	GO:0005739//mitochondrion
CL3757.Contig1_All	3030	GO:0046855//inositol phosphate dephosphorylation;GO:0048768//root hair cell tip growth;GO:0009651//response to salt stress;GO:0009611//response to wounding;GO:0042732//D-xylose metabolic process;GO:0032957//inositol trisphosphate metabolic process	GO:0043812//phosphatidylinositol-4-phosphate phosphatase activity;GO:0004439//phosphatidylinositol-4,5-bisphosphate 5-phosphatase activity	GO:0090404//pollen tube tip;GO:0005739//mitochondrion;GO:0009506//plasmodesma;GO:0005783//endoplasmic reticulum;GO:0031520//plasma membrane of cell tip
CL3757.Contig2_All	3064	GO:0046855//inositol phosphate dephosphorylation;GO:0048768//root hair cell tip growth;GO:0009651//response to salt stress;GO:0009611//response to wounding;GO:0042732//D-xylose metabolic process;GO:0032957//inositol trisphosphate metabolic process	GO:0043812//phosphatidylinositol-4-phosphate phosphatase activity;GO:0004439//phosphatidylinositol-4,5-bisphosphate 5-phosphatase activity	GO:0090404//pollen tube tip;GO:0005739//mitochondrion;GO:0009506//plasmodesma;GO:0005783//endoplasmic reticulum;GO:0031520//plasma membrane of cell tip
CL3757.Contig3_All	3102	GO:0046855//inositol phosphate dephosphorylation;GO:0048768//root hair cell tip growth;GO:0009651//response to salt stress;GO:0032957//inositol trisphosphate metabolic process	GO:0043812//phosphatidylinositol-4-phosphate phosphatase activity;GO:0004439//phosphatidylinositol-4,5-bisphosphate 5-phosphatase activity	GO:0090404//pollen tube tip;GO:0005739//mitochondrion;GO:0005783//endoplasmic reticulum;GO:0031520//plasma membrane of cell tip
CL3757.Contig4_All	3102	GO:0046855//inositol phosphate dephosphorylation;GO:0048768//root hair cell tip growth;GO:0009651//response to salt stress;GO:0032957//inositol trisphosphate metabolic process	GO:0043812//phosphatidylinositol-4-phosphate phosphatase activity;GO:0004439//phosphatidylinositol-4,5-bisphosphate 5-phosphatase activity	GO:0090404//pollen tube tip;GO:0005739//mitochondrion;GO:0005783//endoplasmic reticulum;GO:0031520//plasma membrane of cell tip
CL3757.Contig5_All	4845	GO:0046855//inositol phosphate dephosphorylation;GO:0048768//root hair cell tip growth;GO:0009651//response to salt stress;GO:0032957//inositol trisphosphate metabolic process	GO:0043812//phosphatidylinositol-4-phosphate phosphatase activity;GO:0004439//phosphatidylinositol-4,5-bisphosphate 5-phosphatase activity	GO:0090404//pollen tube tip;GO:0005739//mitochondrion;GO:0005783//endoplasmic reticulum;GO:0031520//plasma membrane of cell tip
CL3757.Contig6_All	1058	GO:0046855//inositol phosphate dephosphorylation;GO:0048768//root hair cell tip growth;GO:0009651//response to salt stress;GO:0032957//inositol trisphosphate metabolic process	GO:0043812//phosphatidylinositol-4-phosphate phosphatase activity;GO:0004439//phosphatidylinositol-4,5-bisphosphate 5-phosphatase activity	GO:0090404//pollen tube tip;GO:0005739//mitochondrion;GO:0005783//endoplasmic reticulum;GO:0031520//plasma membrane of cell tip
CL3757.Contig7_All	1004	GO:0046855//inositol phosphate dephosphorylation;GO:0048768//root hair cell tip growth;GO:0009651//response to salt stress;GO:0032957//inositol trisphosphate metabolic process	GO:0043812//phosphatidylinositol-4-phosphate phosphatase activity;GO:0004439//phosphatidylinositol-4,5-bisphosphate 5-phosphatase activity	GO:0090404//pollen tube tip;GO:0005739//mitochondrion;GO:0005783//endoplasmic reticulum;GO:0031520//plasma membrane of cell tip
CL395.Contig8_All	884	GO:0048589//developmental growth;GO:0045492//xylan biosynthetic process;GO:0007155//cell adhesion;GO:0006944//cellular membrane fusion;GO:0045010//actin nucleation;GO:0033044//regulation of chromosome organization;GO:0006355//regulation of transcription, DNA-dependent;GO:0010090//trichome morphogenesis;GO:0071249//cellular response to nitrate;GO:0048527//lateral root development;GO:0009556//micro…	GO:0032440//2-alkenal reductase [NAD(P)] activity;GO:0046983//protein dimerization activity;GO:0003677//DNA binding;GO:0003700//sequence-specific DNA binding transcription factor activity;GO:0008134//transcription factor binding	GO:0005634//nucleus
CL4042.Contig2_All	1943	GO:0010413//glucuronoxylan metabolic process;GO:0045492//xylan biosynthetic process;GO:0016310//phosphorylation;GO:0048765//root hair cell differentiation	GO:0004672//protein kinase activity;GO:0000166//nucleotide binding	-
CL4523.Contig2_All	1660	GO:0048589//developmental growth;GO:0009793//embryo development ending in seed dormancy;GO:0007389//pattern specification process;GO:0009965//leaf morphogenesis;GO:0048765//root hair cell differentiation;GO:0009606//tropism;GO:0050789//regulation of biological process;GO:0048646//anatomical structure formation involved in morphogenesis;GO:0060918//auxin transport	-	GO:0044459//plasma membrane part
CL4565.Contig2_All	712	GO:0007155//cell adhesion;GO:0045010//actin nucleation;GO:0010311//lateral root formation;GO:0009734//auxin mediated signaling pathway;GO:0006355//regulation of transcription, DNA-dependent;GO:0010090//trichome morphogenesis;GO:0010583//response to cyclopentenone;GO:0048765//root hair cell differentiation;GO:0048366//leaf development;GO:0009741//response to brassinosteroid stimulus;GO:0009723//re…	GO:0046983//protein dimerization activity;GO:0043565//sequence-specific DNA binding;GO:0003700//sequence-specific DNA binding transcription factor activity	GO:0005634//nucleus
CL4565.Contig3_All	759	GO:0007155//cell adhesion;GO:0045010//actin nucleation;GO:0010311//lateral root formation;GO:0009734//auxin mediated signaling pathway;GO:0006355//regulation of transcription, DNA-dependent;GO:0010090//trichome morphogenesis;GO:0010583//response to cyclopentenone;GO:0048765//root hair cell differentiation;GO:0048366//leaf development;GO:0009741//response to brassinosteroid stimulus;GO:0009723//re…	GO:0046983//protein dimerization activity;GO:0043565//sequence-specific DNA binding;GO:0003700//sequence-specific DNA binding transcription factor activity	GO:0005634//nucleus
CL5692.Contig2_All	2336	GO:0036092//phosphatidylinositol-3-phosphate biosynthetic process;GO:0046855//inositol phosphate dephosphorylation;GO:0045492//xylan biosynthetic process;GO:0007155//cell adhesion;GO:0045010//actin nucleation;GO:0032957//inositol trisphosphate metabolic process;GO:0009826//unidimensional cell growth;GO:0006487//protein N-linked glycosylation;GO:0010090//trichome morphogenesis;GO:0048765//root hai…	GO:0043813//phosphatidylinositol-3,5-bisphosphate 5-phosphatase activity;GO:0004439//phosphatidylinositol-4,5-bisphosphate 5-phosphatase activity	GO:0005794//Golgi apparatus;GO:0005634//nucleus
CL5692.Contig3_All	3545	GO:0036092//phosphatidylinositol-3-phosphate biosynthetic process;GO:0046855//inositol phosphate dephosphorylation;GO:0045492//xylan biosynthetic process;GO:0007155//cell adhesion;GO:0045010//actin nucleation;GO:0032957//inositol trisphosphate metabolic process;GO:0009826//unidimensional cell growth;GO:0006487//protein N-linked glycosylation;GO:0010090//trichome morphogenesis;GO:0048765//root hai…	GO:0043813//phosphatidylinositol-3,5-bisphosphate 5-phosphatase activity;GO:0004439//phosphatidylinositol-4,5-bisphosphate 5-phosphatase activity	GO:0005794//Golgi apparatus;GO:0005634//nucleus
CL5851.Contig1_All	1921	GO:0055085//transmembrane transport;GO:0015786//UDP-glucose transport;GO:0015785//UDP-galactose transport;GO:0080147//root hair cell development;GO:0048527//lateral root development;GO:0008643//carbohydrate transport	GO:0005460//UDP-glucose transmembrane transporter activity;GO:0005459//UDP-galactose transmembrane transporter activity	GO:0016021//integral to membrane;GO:0005794//Golgi apparatus;GO:0005886//plasma membrane
CL5851.Contig2_All	2394	GO:0055085//transmembrane transport;GO:0015786//UDP-glucose transport;GO:0015785//UDP-galactose transport;GO:0080147//root hair cell development;GO:0048527//lateral root development;GO:0008643//carbohydrate transport	GO:0005460//UDP-glucose transmembrane transporter activity;GO:0005459//UDP-galactose transmembrane transporter activity	GO:0016021//integral to membrane;GO:0005794//Golgi apparatus;GO:0005886//plasma membrane
CL5851.Contig3_All	1809	GO:0055085//transmembrane transport;GO:0015786//UDP-glucose transport;GO:0015785//UDP-galactose transport;GO:0080147//root hair cell development;GO:0048527//lateral root development;GO:0008643//carbohydrate transport	GO:0005460//UDP-glucose transmembrane transporter activity;GO:0005459//UDP-galactose transmembrane transporter activity	GO:0016021//integral to membrane;GO:0005794//Golgi apparatus;GO:0005886//plasma membrane
CL626.Contig1_All	4476	GO:0009631//cold acclimation;GO:0007155//cell adhesion;GO:0032922//circadian regulation of gene expression;GO:0010104//regulation of ethylene mediated signaling pathway;GO:0045010//actin nucleation;GO:0006355//regulation of transcription, DNA-dependent;GO:0048586//regulation of long-day photoperiodism, flowering;GO:0016926//protein desumoylation;GO:2000022//regulation of jasmonic acid mediated si…	-	GO:0009536//plastid;GO:0005634//nucleus
CL626.Contig2_All	4233	GO:0009631//cold acclimation;GO:0007155//cell adhesion;GO:0032922//circadian regulation of gene expression;GO:0010104//regulation of ethylene mediated signaling pathway;GO:0045010//actin nucleation;GO:0006355//regulation of transcription, DNA-dependent;GO:0048586//regulation of long-day photoperiodism, flowering;GO:0016926//protein desumoylation;GO:2000022//regulation of jasmonic acid mediated si…	-	GO:0009536//plastid;GO:0005634//nucleus
CL626.Contig3_All	4654	GO:0009631//cold acclimation;GO:0007155//cell adhesion;GO:0032922//circadian regulation of gene expression;GO:0010104//regulation of ethylene mediated signaling pathway;GO:0045010//actin nucleation;GO:0006355//regulation of transcription, DNA-dependent;GO:0048586//regulation of long-day photoperiodism, flowering;GO:0016926//protein desumoylation;GO:2000022//regulation of jasmonic acid mediated si…	-	GO:0009536//plastid;GO:0005634//nucleus
CL626.Contig4_All	4498	GO:0009631//cold acclimation;GO:0007155//cell adhesion;GO:0032922//circadian regulation of gene expression;GO:0010104//regulation of ethylene mediated signaling pathway;GO:0045010//actin nucleation;GO:0006355//regulation of transcription, DNA-dependent;GO:0048586//regulation of long-day photoperiodism, flowering;GO:0016926//protein desumoylation;GO:2000022//regulation of jasmonic acid mediated si…	-	GO:0009536//plastid;GO:0005634//nucleus
CL626.Contig5_All	4290	GO:0009631//cold acclimation;GO:0007155//cell adhesion;GO:0032922//circadian regulation of gene expression;GO:0010104//regulation of ethylene mediated signaling pathway;GO:0045010//actin nucleation;GO:0006355//regulation of transcription, DNA-dependent;GO:0048586//regulation of long-day photoperiodism, flowering;GO:0016926//protein desumoylation;GO:2000022//regulation of jasmonic acid mediated si…	-	GO:0009536//plastid;GO:0005634//nucleus
CL626.Contig6_All	4560	GO:0009631//cold acclimation;GO:0007155//cell adhesion;GO:0032922//circadian regulation of gene expression;GO:0010104//regulation of ethylene mediated signaling pathway;GO:0045010//actin nucleation;GO:0006355//regulation of transcription, DNA-dependent;GO:0048586//regulation of long-day photoperiodism, flowering;GO:0016926//protein desumoylation;GO:2000022//regulation of jasmonic acid mediated si…	-	GO:0009536//plastid;GO:0005634//nucleus
CL626.Contig7_All	4711	GO:0009631//cold acclimation;GO:0007155//cell adhesion;GO:0032922//circadian regulation of gene expression;GO:0010104//regulation of ethylene mediated signaling pathway;GO:0045010//actin nucleation;GO:0006355//regulation of transcription, DNA-dependent;GO:0048586//regulation of long-day photoperiodism, flowering;GO:0016926//protein desumoylation;GO:2000022//regulation of jasmonic acid mediated si…	-	GO:0009536//plastid;GO:0005634//nucleus
CL6290.Contig6_All	1180	GO:0009750//response to fructose stimulus;GO:0007010//cytoskeleton organization;GO:0006094//gluconeogenesis;GO:0010218//response to far red light;GO:0006457//protein folding;GO:0042542//response to hydrogen peroxide;GO:0006833//water transport;GO:0009825//multidimensional cell growth;GO:0010114//response to red light;GO:0006816//calcium ion transport;GO:0009651//response to salt stress;GO:0010498…	GO:0005515//protein binding;GO:0005200//structural constituent of cytoskeleton	GO:0016020//membrane;GO:0009507//chloroplast;GO:0005829//cytosol;GO:0005634//nucleus
CL6708.Contig1_All	3035	GO:0006351//transcription, DNA-dependent;GO:0007155//cell adhesion;GO:0045010//actin nucleation;GO:0010311//lateral root formation;GO:0010090//trichome morphogenesis;GO:0010583//response to cyclopentenone;GO:0048765//root hair cell differentiation;GO:0048366//leaf development;GO:0009741//response to brassinosteroid stimulus;GO:0009723//response to ethylene stimulus;GO:0009733//response to auxin s…	GO:0046983//protein dimerization activity;GO:0043565//sequence-specific DNA binding	GO:0009506//plasmodesma;GO:0005634//nucleus
CL6708.Contig3_All	2873	GO:0006351//transcription, DNA-dependent;GO:0007155//cell adhesion;GO:0045010//actin nucleation;GO:0010311//lateral root formation;GO:0010090//trichome morphogenesis;GO:0010583//response to cyclopentenone;GO:0048765//root hair cell differentiation;GO:0048366//leaf development;GO:0009741//response to brassinosteroid stimulus;GO:0009723//response to ethylene stimulus;GO:0009733//response to auxin s…	GO:0046983//protein dimerization activity;GO:0043565//sequence-specific DNA binding	GO:0009506//plasmodesma;GO:0005634//nucleus
CL6709.Contig2_All	1404	GO:0048587//regulation of short-day photoperiodism, flowering;GO:0007155//cell adhesion;GO:0009793//embryo development ending in seed dormancy;GO:0045010//actin nucleation;GO:0016926//protein desumoylation;GO:0010090//trichome morphogenesis;GO:0050665//hydrogen peroxide biosynthetic process;GO:0048765//root hair cell differentiation;GO:0071555//cell wall organization	GO:0035064//methylated histone residue binding	GO:0009506//plasmodesma;GO:0031519//PcG protein complex
CL6709.Contig7_All	1351	GO:0048587//regulation of short-day photoperiodism, flowering;GO:0007155//cell adhesion;GO:0009793//embryo development ending in seed dormancy;GO:0045010//actin nucleation;GO:0016926//protein desumoylation;GO:0010090//trichome morphogenesis;GO:0050665//hydrogen peroxide biosynthetic process;GO:0048765//root hair cell differentiation;GO:0071555//cell wall organization	GO:0035064//methylated histone residue binding	GO:0009506//plasmodesma;GO:0031519//PcG protein complex
CL6726.Contig1_All	1487	GO:0000911//cytokinesis by cell plate formation;GO:0016192//vesicle-mediated transport;GO:0010540//basipetal auxin transport;GO:0080119//ER body organization;GO:0009942//longitudinal axis specification;GO:0010087//phloem or xylem histogenesis;GO:0032012//regulation of ARF protein signal transduction;GO:0007155//cell adhesion;GO:0048765//root hair cell differentiation;GO:0009826//unidimensional ce…	GO:0005086//ARF guanyl-nucleotide exchange factor activity;GO:0010292//GTP:GDP antiporter activity;GO:0042803//protein homodimerization activity	GO:0005802//trans-Golgi network
CL6726.Contig2_All	940	GO:0000278//mitotic cell cycle;GO:0080119//ER body organization;GO:0006094//gluconeogenesis;GO:0010431//seed maturation;GO:0007155//cell adhesion;GO:0000911//cytokinesis by cell plate formation;GO:0032509//endosome transport via multivesicular body sorting pathway;GO:0045010//actin nucleation;GO:0010311//lateral root formation;GO:0033044//regulation of chromosome organization;GO:0010498//proteaso…	GO:0010292//GTP:GDP antiporter activity;GO:0005086//ARF guanyl-nucleotide exchange factor activity;GO:0042803//protein homodimerization activity	GO:0005802//trans-Golgi network;GO:0005768//endosome;GO:0005886//plasma membrane
CL6726.Contig3_All	5276	GO:0000278//mitotic cell cycle;GO:0006094//gluconeogenesis;GO:0010431//seed maturation;GO:0007155//cell adhesion;GO:0000911//cytokinesis by cell plate formation;GO:0032509//endosome transport via multivesicular body sorting pathway;GO:0045010//actin nucleation;GO:0010311//lateral root formation;GO:0033044//regulation of chromosome organization;GO:0010498//proteasomal protein catabolic process;GO:…	GO:0010292//GTP:GDP antiporter activity;GO:0005086//ARF guanyl-nucleotide exchange factor activity;GO:0042803//protein homodimerization activity	GO:0005768//endosome;GO:0005886//plasma membrane
CL6726.Contig5_All	705	GO:0000278//mitotic cell cycle;GO:0006094//gluconeogenesis;GO:0010431//seed maturation;GO:0007155//cell adhesion;GO:0000911//cytokinesis by cell plate formation;GO:0032509//endosome transport via multivesicular body sorting pathway;GO:0045010//actin nucleation;GO:0010311//lateral root formation;GO:0033044//regulation of chromosome organization;GO:0010498//proteasomal protein catabolic process;GO:…	GO:0010292//GTP:GDP antiporter activity;GO:0005086//ARF guanyl-nucleotide exchange factor activity;GO:0042803//protein homodimerization activity	GO:0005768//endosome;GO:0005886//plasma membrane
CL6726.Contig6_All	5263	GO:0000278//mitotic cell cycle;GO:0006094//gluconeogenesis;GO:0010431//seed maturation;GO:0007155//cell adhesion;GO:0000911//cytokinesis by cell plate formation;GO:0032509//endosome transport via multivesicular body sorting pathway;GO:0045010//actin nucleation;GO:0010311//lateral root formation;GO:0033044//regulation of chromosome organization;GO:0010498//proteasomal protein catabolic process;GO:…	GO:0010292//GTP:GDP antiporter activity;GO:0005086//ARF guanyl-nucleotide exchange factor activity;GO:0042803//protein homodimerization activity	GO:0005768//endosome;GO:0005886//plasma membrane
CL6744.Contig1_All	381	GO:2000039//regulation of trichome morphogenesis;GO:0006355//regulation of transcription, DNA-dependent;GO:0009651//response to salt stress;GO:0010063//positive regulation of trichoblast fate specification;GO:0048629//trichome patterning;GO:0009753//response to jasmonic acid stimulus;GO:0009751//response to salicylic acid stimulus;GO:0048765//root hair cell differentiation;GO:0010228//vegetative …	GO:0003677//DNA binding;GO:0003700//sequence-specific DNA binding transcription factor activity;GO:0003682//chromatin binding	GO:0005634//nucleus
CL6744.Contig2_All	575	GO:2000039//regulation of trichome morphogenesis;GO:0006355//regulation of transcription, DNA-dependent;GO:0009651//response to salt stress;GO:0010063//positive regulation of trichoblast fate specification;GO:0048629//trichome patterning;GO:0009753//response to jasmonic acid stimulus;GO:0009751//response to salicylic acid stimulus;GO:0048765//root hair cell differentiation;GO:0010228//vegetative …	GO:0005515//protein binding;GO:0003677//DNA binding;GO:0003700//sequence-specific DNA binding transcription factor activity;GO:0003682//chromatin binding	GO:0005634//nucleus
CL6799.Contig2_All	480	GO:0042335//cuticle development;GO:0006473//protein acetylation;GO:0006355//regulation of transcription, DNA-dependent;GO:0043481//anthocyanin accumulation in tissues in response to UV light;GO:0048765//root hair cell differentiation	GO:0043565//sequence-specific DNA binding;GO:0003700//sequence-specific DNA binding transcription factor activity	GO:0005634//nucleus
CL727.Contig1_All	3287	GO:0010267//production of ta-siRNAs involved in RNA interference;GO:0006346//methylation-dependent chromatin silencing;GO:0009965//leaf morphogenesis;GO:0048439//flower morphogenesis;GO:0010589//leaf proximal/distal pattern formation;GO:0048765//root hair cell differentiation;GO:0051301//cell division;GO:0006306//DNA methylation;GO:0009926//auxin polar transport;GO:0010072//primary shoot apical m…	GO:0004521//endoribonuclease activity;GO:0035197//siRNA binding;GO:0005515//protein binding;GO:0035198//miRNA binding	GO:0019898//extrinsic to membrane;GO:0005829//cytosol;GO:0005634//nucleus
CL727.Contig5_All	1222	GO:0010267//production of ta-siRNAs involved in RNA interference;GO:0006346//methylation-dependent chromatin silencing;GO:0009965//leaf morphogenesis;GO:0048439//flower morphogenesis;GO:0010589//leaf proximal/distal pattern formation;GO:0048765//root hair cell differentiation;GO:0051301//cell division;GO:0006306//DNA methylation;GO:0009926//auxin polar transport;GO:0010072//primary shoot apical m…	GO:0004521//endoribonuclease activity;GO:0035197//siRNA binding;GO:0005515//protein binding;GO:0035198//miRNA binding	GO:0019898//extrinsic to membrane;GO:0005829//cytosol;GO:0005634//nucleus
CL7869.Contig1_All	7506	GO:0009960//endosperm development;GO:0009880//embryonic pattern specification;GO:0010431//seed maturation;GO:0007155//cell adhesion;GO:0045010//actin nucleation;GO:0001708//cell fate specification;GO:0051301//cell division;GO:0010090//trichome morphogenesis;GO:0048765//root hair cell differentiation;GO:0010228//vegetative to reproductive phase transition of meristem;GO:0045595//regulation of cell…	GO:0004198//calcium-dependent cysteine-type endopeptidase activity	GO:0005783//endoplasmic reticulum;GO:0005886//plasma membrane
CL7869.Contig2_All	7586	GO:0009960//endosperm development;GO:0009880//embryonic pattern specification;GO:0010431//seed maturation;GO:0007155//cell adhesion;GO:0045010//actin nucleation;GO:0001708//cell fate specification;GO:0051301//cell division;GO:0010090//trichome morphogenesis;GO:0048765//root hair cell differentiation;GO:0010228//vegetative to reproductive phase transition of meristem;GO:0045595//regulation of cell…	GO:0004198//calcium-dependent cysteine-type endopeptidase activity	GO:0005783//endoplasmic reticulum;GO:0005886//plasma membrane
CL7869.Contig3_All	2432	GO:0009960//endosperm development;GO:0009880//embryonic pattern specification;GO:0010431//seed maturation;GO:0007155//cell adhesion;GO:0045010//actin nucleation;GO:0001708//cell fate specification;GO:0051301//cell division;GO:0010090//trichome morphogenesis;GO:0048765//root hair cell differentiation;GO:0010228//vegetative to reproductive phase transition of meristem;GO:0045595//regulation of cell…	GO:0004198//calcium-dependent cysteine-type endopeptidase activity	GO:0005783//endoplasmic reticulum;GO:0005886//plasma membrane
CL8257.Contig1_All	1683	GO:0009611//response to wounding;GO:0009620//response to fungus;GO:0009414//response to water deprivation;GO:0015969//guanosine tetraphosphate metabolic process;GO:0009624//response to nematode;GO:0009753//response to jasmonic acid stimulus;GO:0006855//drug transmembrane transport;GO:0042538//hyperosmotic salinity response;GO:0048765//root hair cell differentiation;GO:0009695//jasmonic acid biosy…	GO:0015297//antiporter activity;GO:0046872//metal ion binding;GO:0008728//GTP diphosphokinase activity;GO:0015238//drug transmembrane transporter activity;GO:0008081//phosphoric diester hydrolase activity	GO:0005774//vacuolar membrane;GO:0009507//chloroplast;GO:0005886//plasma membrane
CL8257.Contig3_All	906	GO:0009611//response to wounding;GO:0009620//response to fungus;GO:0009414//response to water deprivation;GO:0015969//guanosine tetraphosphate metabolic process;GO:0009624//response to nematode;GO:0009753//response to jasmonic acid stimulus;GO:0006855//drug transmembrane transport;GO:0042538//hyperosmotic salinity response;GO:0048765//root hair cell differentiation;GO:0009695//jasmonic acid biosy…	GO:0015297//antiporter activity;GO:0046872//metal ion binding;GO:0008728//GTP diphosphokinase activity;GO:0015238//drug transmembrane transporter activity;GO:0008081//phosphoric diester hydrolase activity	GO:0005774//vacuolar membrane;GO:0009507//chloroplast;GO:0005886//plasma membrane
CL8257.Contig4_All	2742	GO:0009611//response to wounding;GO:0009620//response to fungus;GO:0009414//response to water deprivation;GO:0015969//guanosine tetraphosphate metabolic process;GO:0009624//response to nematode;GO:0009753//response to jasmonic acid stimulus;GO:0006855//drug transmembrane transport;GO:0042538//hyperosmotic salinity response;GO:0048765//root hair cell differentiation;GO:0009695//jasmonic acid biosy…	GO:0015297//antiporter activity;GO:0046872//metal ion binding;GO:0008728//GTP diphosphokinase activity;GO:0015238//drug transmembrane transporter activity;GO:0008081//phosphoric diester hydrolase activity	GO:0005773//vacuole;GO:0009507//chloroplast;GO:0005886//plasma membrane
CL8293.Contig1_All	2586	GO:0080147//root hair cell development;GO:0006486//protein glycosylation;GO:0052325//cell wall pectin biosynthetic process	GO:0052636//arabinosyltransferase activity	GO:0005768//endosome;GO:0005802//trans-Golgi network;GO:0005794//Golgi apparatus;GO:0005634//nucleus
CL8293.Contig2_All	2120	GO:0080147//root hair cell development;GO:0006486//protein glycosylation;GO:0052325//cell wall pectin biosynthetic process	GO:0052636//arabinosyltransferase activity	GO:0005768//endosome;GO:0005802//trans-Golgi network;GO:0005783//endoplasmic reticulum;GO:0005794//Golgi apparatus;GO:0005634//nucleus
CL8293.Contig3_All	2533	GO:0080147//root hair cell development;GO:0006486//protein glycosylation;GO:0052325//cell wall pectin biosynthetic process	GO:0052636//arabinosyltransferase activity	GO:0005768//endosome;GO:0005802//trans-Golgi network;GO:0005794//Golgi apparatus;GO:0005634//nucleus
CL8394.Contig3_All	1605	GO:0055114//oxidation-reduction process;GO:0080147//root hair cell development	GO:0004656//procollagen-proline 4-dioxygenase activity;GO:0031418//L-ascorbic acid binding;GO:0005506//iron ion binding	GO:0016023//cytoplasmic membrane-bounded vesicle;GO:0005576//extracellular region
CL8501.Contig1_All	713	GO:0006406//mRNA export from nucleus;GO:0009965//leaf morphogenesis;GO:0016570//histone modification;GO:0048481//ovule development;GO:0048765//root hair cell differentiation;GO:0010082//regulation of root meristem growth;GO:0010074//maintenance of meristem identity;GO:0048449//floral organ formation;GO:0010090//trichome morphogenesis;GO:0010014//meristem initiation;GO:0032312//regulation of ARF G…	GO:0004672//protein kinase activity;GO:0008060//ARF GTPase activator activity;GO:0005543//phospholipid binding;GO:0019900//kinase binding;GO:0033612//receptor serine/threonine kinase binding;GO:0008270//zinc ion binding;GO:0005524//ATP binding	GO:0016023//cytoplasmic membrane-bounded vesicle;GO:0005886//plasma membrane
CL8539.Contig2_All	3107	GO:0048765//root hair cell differentiation;GO:0009826//unidimensional cell growth;GO:0000904//cell morphogenesis involved in differentiation	GO:0005515//protein binding;GO:0003824//catalytic activity	GO:0009506//plasmodesma;GO:0009505//plant-type cell wall
CL8627.Contig13_All	1486	GO:0048765//root hair cell differentiation	GO:0016757//transferase activity, transferring glycosyl groups	GO:0005794//Golgi apparatus;GO:0009507//chloroplast
CL8627.Contig14_All	1459	GO:0048765//root hair cell differentiation	GO:0016757//transferase activity, transferring glycosyl groups	GO:0005794//Golgi apparatus;GO:0009507//chloroplast
CL8627.Contig15_All	1624	GO:0048765//root hair cell differentiation	GO:0016757//transferase activity, transferring glycosyl groups	GO:0005794//Golgi apparatus;GO:0009507//chloroplast
CL8627.Contig5_All	2488	GO:0048765//root hair cell differentiation	-	GO:0009507//chloroplast
CL8627.Contig9_All	2350	GO:0048765//root hair cell differentiation	GO:0016757//transferase activity, transferring glycosyl groups	GO:0005794//Golgi apparatus;GO:0009507//chloroplast
CL8628.Contig2_All	1415	GO:0000226//microtubule cytoskeleton organization;GO:0080147//root hair cell development;GO:0009860//pollen tube growth	GO:0005089//Rho guanyl-nucleotide exchange factor activity	GO:0005875//microtubule associated complex;GO:0005737//cytoplasm;GO:0005634//nucleus
CL9078.Contig1_All	753	GO:2000039//regulation of trichome morphogenesis;GO:0006355//regulation of transcription, DNA-dependent;GO:0009651//response to salt stress;GO:0010063//positive regulation of trichoblast fate specification;GO:0048629//trichome patterning;GO:0009753//response to jasmonic acid stimulus;GO:0009751//response to salicylic acid stimulus;GO:0048765//root hair cell differentiation;GO:0010228//vegetative …	GO:0005515//protein binding;GO:0003677//DNA binding;GO:0003700//sequence-specific DNA binding transcription factor activity;GO:0003682//chromatin binding	GO:0005634//nucleus
CL9905.Contig1_All	1544	GO:0048765//root hair cell differentiation	GO:0016757//transferase activity, transferring glycosyl groups	GO:0005794//Golgi apparatus;GO:0009507//chloroplast
CL9905.Contig2_All	2530	GO:0048765//root hair cell differentiation	GO:0016757//transferase activity, transferring glycosyl groups	GO:0005794//Golgi apparatus;GO:0009507//chloroplast
CL9956.Contig1_All	715	GO:0009750//response to fructose stimulus;GO:0007010//cytoskeleton organization;GO:0006094//gluconeogenesis;GO:0010218//response to far red light;GO:0006457//protein folding;GO:0042542//response to hydrogen peroxide;GO:0006833//water transport;GO:0009825//multidimensional cell growth;GO:0010114//response to red light;GO:0006816//calcium ion transport;GO:0009651//response to salt stress;GO:0010498…	GO:0005515//protein binding;GO:0005200//structural constituent of cytoskeleton	GO:0016020//membrane;GO:0009507//chloroplast;GO:0005829//cytosol;GO:0005634//nucleus
CL9956.Contig2_All	959	GO:0009750//response to fructose stimulus;GO:0007010//cytoskeleton organization;GO:0006094//gluconeogenesis;GO:0010218//response to far red light;GO:0006457//protein folding;GO:0042542//response to hydrogen peroxide;GO:0006833//water transport;GO:0009825//multidimensional cell growth;GO:0010114//response to red light;GO:0006816//calcium ion transport;GO:0009651//response to salt stress;GO:0010498…	GO:0005515//protein binding;GO:0005200//structural constituent of cytoskeleton	GO:0016020//membrane;GO:0009507//chloroplast;GO:0005829//cytosol;GO:0005634//nucleus
CL9956.Contig3_All	2167	GO:0009750//response to fructose stimulus;GO:0007010//cytoskeleton organization;GO:0006094//gluconeogenesis;GO:0010218//response to far red light;GO:0006457//protein folding;GO:0042542//response to hydrogen peroxide;GO:0006833//water transport;GO:0009825//multidimensional cell growth;GO:0010114//response to red light;GO:0006816//calcium ion transport;GO:0009651//response to salt stress;GO:0010498…	GO:0005515//protein binding;GO:0005200//structural constituent of cytoskeleton	GO:0009507//chloroplast;GO:0005829//cytosol;GO:0044425//membrane part;GO:0005783//endoplasmic reticulum;GO:0005634//nucleus
Unigene10088_All	922	GO:0048868//pollen tube development;GO:0051510//regulation of unidimensional cell growth;GO:0048610//cellular process involved in reproduction;GO:0048765//root hair cell differentiation	GO:0004672//protein kinase activity;GO:0000166//nucleotide binding	GO:0016020//membrane
Unigene10234_All	2530	GO:0048868//pollen tube development;GO:0051510//regulation of unidimensional cell growth;GO:0048610//cellular process involved in reproduction;GO:0048765//root hair cell differentiation	GO:0004672//protein kinase activity;GO:0000166//nucleotide binding	GO:0016020//membrane
Unigene10428_All	670	GO:0000226//microtubule cytoskeleton organization;GO:0080147//root hair cell development;GO:0009860//pollen tube growth	GO:0005089//Rho guanyl-nucleotide exchange factor activity	GO:0005875//microtubule associated complex;GO:0005737//cytoplasm;GO:0005634//nucleus
Unigene11122_All	1320	GO:0000278//mitotic cell cycle;GO:0048589//developmental growth;GO:0007155//cell adhesion;GO:0009825//multidimensional cell growth;GO:0045010//actin nucleation;GO:0048449//floral organ formation;GO:0003002//regionalization;GO:0010090//trichome morphogenesis;GO:0048765//root hair cell differentiation;GO:0045595//regulation of cell differentiation;GO:0010014//meristem initiation;GO:0045893//positiv…	GO:0005515//protein binding	GO:0031209//SCAR complex;GO:0005886//plasma membrane
Unigene11123_All	1306	GO:0000278//mitotic cell cycle;GO:0048589//developmental growth;GO:0007155//cell adhesion;GO:0009825//multidimensional cell growth;GO:0045010//actin nucleation;GO:0048449//floral organ formation;GO:0003002//regionalization;GO:0010090//trichome morphogenesis;GO:0048765//root hair cell differentiation;GO:0045595//regulation of cell differentiation;GO:0010014//meristem initiation;GO:0045893//positiv…	GO:0005515//protein binding	GO:0031209//SCAR complex;GO:0005886//plasma membrane
Unigene1146_All	4250	GO:0000226//microtubule cytoskeleton organization;GO:0009934//regulation of meristem structural organization;GO:0007155//cell adhesion;GO:0000911//cytokinesis by cell plate formation;GO:0006406//mRNA export from nucleus;GO:0045010//actin nucleation;GO:0010090//trichome morphogenesis;GO:0010074//maintenance of meristem identity;GO:0048765//root hair cell differentiation;GO:0045893//positive regula…	GO:0005543//phospholipid binding;GO:0004722//protein serine/threonine phosphatase activity	GO:0005886//plasma membrane
Unigene11509_All	1050	GO:0048768//root hair cell tip growth;GO:0042742//defense response to bacterium;GO:0001558//regulation of cell growth;GO:0009860//pollen tube growth;GO:0010252//auxin homeostasis;GO:0048527//lateral root development;GO:0008283//cell proliferation;GO:0046686//response to cadmium ion;GO:0040014//regulation of multicellular organism growth;GO:0007346//regulation of mitotic cell cycle;GO:0009790//emb…	-	GO:0009579//thylakoid;GO:0009507//chloroplast;GO:0090406//pollen tube;GO:0005634//nucleus;GO:0005886//plasma membrane;GO:0048046//apoplast
Unigene13279_All	2472	GO:0000278//mitotic cell cycle;GO:0048589//developmental growth;GO:0007155//cell adhesion;GO:0009825//multidimensional cell growth;GO:0045010//actin nucleation;GO:0048449//floral organ formation;GO:0003002//regionalization;GO:0010090//trichome morphogenesis;GO:0048765//root hair cell differentiation;GO:0045595//regulation of cell differentiation;GO:0010014//meristem initiation;GO:0045893//positiv…	GO:0005515//protein binding	GO:0031209//SCAR complex;GO:0005886//plasma membrane
Unigene14582_All	1279	GO:0048768//root hair cell tip growth;GO:0060151//peroxisome localization;GO:0010154//fruit development;GO:0051301//cell division;GO:0009791//post-embryonic development;GO:0051646//mitochondrion localization;GO:0010091//trichome branching;GO:0051645//Golgi localization	GO:0042802//identical protein binding;GO:0005524//ATP binding;GO:0003774//motor activity;GO:0003779//actin binding	GO:0016459//myosin complex
Unigene14709_All	3190	GO:0030002//cellular anion homeostasis;GO:0007155//cell adhesion;GO:0045010//actin nucleation;GO:0006821//chloride transport;GO:0009826//unidimensional cell growth;GO:0010090//trichome morphogenesis;GO:0010038//response to metal ion;GO:0048765//root hair cell differentiation;GO:0055085//transmembrane transport;GO:0071555//cell wall organization	GO:0005247//voltage-gated chloride channel activity	GO:0005802//trans-Golgi network;GO:0016021//integral to membrane
Unigene16730_All	344	GO:0048768//root hair cell tip growth;GO:0060151//peroxisome localization;GO:0010154//fruit development;GO:0010584//pollen exine formation;GO:0051301//cell division;GO:0030036//actin cytoskeleton organization;GO:0009791//post-embryonic development;GO:0051646//mitochondrion localization;GO:0010091//trichome branching;GO:0051645//Golgi localization;GO:0030048//actin filament-based movement	GO:0005524//ATP binding;GO:0003774//motor activity;GO:0003779//actin binding	GO:0016459//myosin complex;GO:0005773//vacuole;GO:0005634//nucleus
Unigene20484_All	1214	GO:0007155//cell adhesion;GO:0045010//actin nucleation;GO:0010311//lateral root formation;GO:0009734//auxin mediated signaling pathway;GO:0006355//regulation of transcription, DNA-dependent;GO:0009638//phototropism;GO:0010090//trichome morphogenesis;GO:0010583//response to cyclopentenone;GO:0048765//root hair cell differentiation;GO:0048366//leaf development;GO:0009741//response to brassinosteroi…	GO:0046983//protein dimerization activity;GO:0043565//sequence-specific DNA binding;GO:0003700//sequence-specific DNA binding transcription factor activity	GO:0005634//nucleus
Unigene20956_All	1853	GO:0006355//regulation of transcription, DNA-dependent;GO:0000041//transition metal ion transport;GO:0048589//developmental growth;GO:0015698//inorganic anion transport;GO:0048527//lateral root development;GO:0048765//root hair cell differentiation	GO:0046983//protein dimerization activity;GO:0003700//sequence-specific DNA binding transcription factor activity	GO:0005634//nucleus
Unigene21004_All	5019	GO:0000278//mitotic cell cycle;GO:0048589//developmental growth;GO:0007155//cell adhesion;GO:0009825//multidimensional cell growth;GO:0045010//actin nucleation;GO:0048449//floral organ formation;GO:0003002//regionalization;GO:0010090//trichome morphogenesis;GO:0048765//root hair cell differentiation;GO:0045595//regulation of cell differentiation;GO:0010014//meristem initiation;GO:0045893//positiv…	GO:0005515//protein binding	GO:0031209//SCAR complex;GO:0005886//plasma membrane
Unigene22232_All	398	GO:0048768//root hair cell tip growth;GO:0060151//peroxisome localization;GO:0010154//fruit development;GO:0051301//cell division;GO:0009791//post-embryonic development;GO:0051646//mitochondrion localization;GO:0010091//trichome branching;GO:0051645//Golgi localization	GO:0042802//identical protein binding;GO:0005524//ATP binding;GO:0003774//motor activity;GO:0003779//actin binding	GO:0016459//myosin complex;GO:0005773//vacuole
Unigene22702_All	1993	GO:0009750//response to fructose stimulus;GO:0042744//hydrogen peroxide catabolic process;GO:0006833//water transport;GO:0051410//detoxification of nitrogen compound;GO:0080147//root hair cell development;GO:0019288//isopentenyl diphosphate biosynthetic process, mevalonate-independent pathway;GO:0009651//response to salt stress;GO:0006972//hyperosmotic response;GO:0007030//Golgi organization;GO:0…	GO:0016740//transferase activity;GO:0004124//cysteine synthase activity;GO:0050017//L-3-cyanoalanine synthase activity;GO:0030170//pyridoxal phosphate binding;GO:0005507//copper ion binding	GO:0009507//chloroplast;GO:0005739//mitochondrion
Unigene23009_All	4794	GO:0000278//mitotic cell cycle;GO:0048589//developmental growth;GO:0007155//cell adhesion;GO:0045010//actin nucleation;GO:0033044//regulation of chromosome organization;GO:0016926//protein desumoylation;GO:0048449//floral organ formation;GO:0003002//regionalization;GO:0010090//trichome morphogenesis;GO:0050665//hydrogen peroxide biosynthetic process;GO:0048765//root hair cell differentiation;GO:0…	GO:0003777//microtubule motor activity;GO:0005524//ATP binding	GO:0005874//microtubule;GO:0005795//Golgi stack;GO:0005875//microtubule associated complex;GO:0005886//plasma membrane
Unigene25172_All	1160	GO:0010090//trichome morphogenesis;GO:0071555//cell wall organization;GO:0007155//cell adhesion;GO:0048765//root hair cell differentiation;GO:0045010//actin nucleation	-	GO:0044464//cell part
Unigene25205_All	898	GO:0010090//trichome morphogenesis;GO:0071555//cell wall organization;GO:0007155//cell adhesion;GO:0048765//root hair cell differentiation;GO:0045010//actin nucleation	-	GO:0005737//cytoplasm;GO:0005886//plasma membrane
Unigene26330_All	551	GO:0048768//root hair cell tip growth;GO:0060151//peroxisome localization;GO:0010154//fruit development;GO:0051301//cell division;GO:0009791//post-embryonic development;GO:0051646//mitochondrion localization;GO:0010091//trichome branching;GO:0051645//Golgi localization	GO:0042802//identical protein binding;GO:0005524//ATP binding;GO:0003774//motor activity;GO:0003779//actin binding	GO:0016459//myosin complex
Unigene26942_All	1140	GO:0048768//root hair cell tip growth;GO:0042742//defense response to bacterium;GO:0001558//regulation of cell growth;GO:0009860//pollen tube growth;GO:0010252//auxin homeostasis;GO:0048527//lateral root development;GO:0008283//cell proliferation;GO:0046686//response to cadmium ion;GO:0040014//regulation of multicellular organism growth;GO:0007346//regulation of mitotic cell cycle;GO:0009790//emb…	-	GO:0009579//thylakoid;GO:0009507//chloroplast;GO:0090406//pollen tube;GO:0005634//nucleus;GO:0005886//plasma membrane;GO:0048046//apoplast
Unigene27213_All	1947	GO:0048768//root hair cell tip growth;GO:0060151//peroxisome localization;GO:0010154//fruit development;GO:0051301//cell division;GO:0009791//post-embryonic development;GO:0051646//mitochondrion localization;GO:0010091//trichome branching;GO:0051645//Golgi localization	GO:0042802//identical protein binding;GO:0005524//ATP binding;GO:0003774//motor activity;GO:0003779//actin binding	GO:0016459//myosin complex
Unigene27214_All	3344	GO:0048768//root hair cell tip growth;GO:0060151//peroxisome localization;GO:0010154//fruit development;GO:0051301//cell division;GO:0009791//post-embryonic development;GO:0051646//mitochondrion localization;GO:0010091//trichome branching;GO:0051645//Golgi localization	GO:0042802//identical protein binding;GO:0005524//ATP binding;GO:0003774//motor activity;GO:0003779//actin binding	GO:0016459//myosin complex
Unigene27216_All	3472	GO:0048768//root hair cell tip growth;GO:0060151//peroxisome localization;GO:0010154//fruit development;GO:0051301//cell division;GO:0009791//post-embryonic development;GO:0051646//mitochondrion localization;GO:0010091//trichome branching;GO:0051645//Golgi localization	GO:0042802//identical protein binding;GO:0005524//ATP binding;GO:0003774//motor activity;GO:0003779//actin binding	GO:0016459//myosin complex
Unigene27223_All	4000	GO:0048768//root hair cell tip growth;GO:0060151//peroxisome localization;GO:0010154//fruit development;GO:0051301//cell division;GO:0009791//post-embryonic development;GO:0051646//mitochondrion localization;GO:0010091//trichome branching;GO:0051645//Golgi localization	GO:0042802//identical protein binding;GO:0005524//ATP binding;GO:0003774//motor activity;GO:0003779//actin binding	GO:0016459//myosin complex
Unigene27779_All	4206	GO:0010090//trichome morphogenesis;GO:0071555//cell wall organization;GO:0000226//microtubule cytoskeleton organization;GO:0030865//cortical cytoskeleton organization;GO:0007155//cell adhesion;GO:0000913//preprophase band assembly;GO:0048765//root hair cell differentiation;GO:0045010//actin nucleation;GO:0009826//unidimensional cell growth	GO:0030359//protein phosphatase type 2B regulator activity;GO:0005509//calcium ion binding;GO:0005515//protein binding	GO:0005819//spindle;GO:0009524//phragmoplast;GO:0005634//nucleus
Unigene27976_All	2546	GO:0009793//embryo development ending in seed dormancy;GO:0043481//anthocyanin accumulation in tissues in response to UV light;GO:0048765//root hair cell differentiation;GO:0048443//stamen development;GO:0006200//ATP catabolic process;GO:0010090//trichome morphogenesis;GO:0010315//auxin efflux;GO:0010048//vernalization response;GO:0009637//response to blue light;GO:0009624//response to nematode;G…	GO:0010329//auxin efflux transmembrane transporter activity;GO:0005524//ATP binding;GO:0008559//xenobiotic-transporting ATPase activity;GO:0015408;GO:0005516//calmodulin binding	GO:0009506//plasmodesma;GO:0005886//plasma membrane;GO:0016021//integral to membrane
Unigene28008_All	1181	GO:0000278//mitotic cell cycle;GO:0048589//developmental growth;GO:0007155//cell adhesion;GO:0045010//actin nucleation;GO:0033044//regulation of chromosome organization;GO:0016926//protein desumoylation;GO:0048449//floral organ formation;GO:0003002//regionalization;GO:0010090//trichome morphogenesis;GO:0050665//hydrogen peroxide biosynthetic process;GO:0048765//root hair cell differentiation;GO:0…	GO:0003777//microtubule motor activity;GO:0005524//ATP binding	GO:0005874//microtubule;GO:0005795//Golgi stack;GO:0005875//microtubule associated complex;GO:0005886//plasma membrane
Unigene28577_All	1682	GO:0080147//root hair cell development	-	-
Unigene29908_All	503	GO:0009880//embryonic pattern specification;GO:0050826//response to freezing;GO:0007131//reciprocal meiotic recombination;GO:0007155//cell adhesion;GO:0009944//polarity specification of adaxial/abaxial axis;GO:0045010//actin nucleation;GO:0045132//meiotic chromosome segregation;GO:0033044//regulation of chromosome organization;GO:0006355//regulation of transcription, DNA-dependent;GO:0010075//reg…	GO:0005515//protein binding;GO:0043565//sequence-specific DNA binding;GO:0003700//sequence-specific DNA binding transcription factor activity	GO:0005634//nucleus
Unigene30799_All	644	GO:0030643//cellular phosphate ion homeostasis;GO:0007155//cell adhesion;GO:0045010//actin nucleation;GO:0010075//regulation of meristem growth;GO:0052546//cell wall pectin metabolic process;GO:0010090//trichome morphogenesis;GO:0005982//starch metabolic process;GO:0044710;GO:0048765//root hair cell differentiation;GO:0010442//guard cell morphogenesis;GO:0009832//plant-type cell wall biogenesis;G…	GO:0008889//glycerophosphodiester phosphodiesterase activity	GO:0048046//apoplast;GO:0046658//anchored to plasma membrane;GO:0009507//chloroplast;GO:0009506//plasmodesma
Unigene31048_All	213	GO:0048467//gynoecium development;GO:0048768//root hair cell tip growth;GO:0060151//peroxisome localization;GO:0010154//fruit development;GO:0051301//cell division;GO:0090436//leaf pavement cell development;GO:0051646//mitochondrion localization;GO:0010091//trichome branching;GO:0051645//Golgi localization;GO:0030048//actin filament-based movement	GO:0005524//ATP binding;GO:0003774//motor activity;GO:0003779//actin binding	GO:0016459//myosin complex;GO:0009506//plasmodesma
Unigene32965_All	541	GO:0048768//root hair cell tip growth;GO:0060151//peroxisome localization;GO:0010154//fruit development;GO:0051301//cell division;GO:0009791//post-embryonic development;GO:0051646//mitochondrion localization;GO:0010091//trichome branching;GO:0051645//Golgi localization	GO:0042802//identical protein binding;GO:0005524//ATP binding;GO:0003774//motor activity;GO:0003779//actin binding	GO:0016459//myosin complex
Unigene33246_All	351	GO:0009788//negative regulation of abscisic acid mediated signaling pathway;GO:0000394//RNA splicing, via endonucleolytic cleavage and ligation;GO:0006366//transcription from RNA polymerase II promoter;GO:0006355//regulation of transcription, DNA-dependent;GO:0009651//response to salt stress;GO:0010063//positive regulation of trichoblast fate specification;GO:0009753//response to jasmonic acid st…	GO:0008022//protein C-terminus binding;GO:0003677//DNA binding;GO:0008420//CTD phosphatase activity;GO:0003700//sequence-specific DNA binding transcription factor activity;GO:0003682//chromatin binding	GO:0005634//nucleus
Unigene33365_All	2351	GO:0010103//stomatal complex morphogenesis;GO:0000914//phragmoplast assembly;GO:0051641//cellular localization;GO:0006184//GTP catabolic process;GO:0051258//protein polymerization;GO:0009553//embryo sac development;GO:0048768//root hair cell tip growth;GO:0048366//leaf development;GO:0007018//microtubule-based movement	GO:0005198//structural molecule activity;GO:0005525//GTP binding;GO:0003924//GTPase activity	GO:0005815//microtubule organizing center;GO:0005618//cell wall;GO:0005829//cytosol;GO:0005874//microtubule;GO:0005635//nuclear envelope;GO:0005886//plasma membrane;GO:0005739//mitochondrion
Unigene34382_All	1918	GO:0009793//embryo development ending in seed dormancy;GO:0043481//anthocyanin accumulation in tissues in response to UV light;GO:0048765//root hair cell differentiation;GO:0048443//stamen development;GO:0006200//ATP catabolic process;GO:0010090//trichome morphogenesis;GO:0010315//auxin efflux;GO:0010048//vernalization response;GO:0009637//response to blue light;GO:0009624//response to nematode;G…	GO:0010329//auxin efflux transmembrane transporter activity;GO:0005524//ATP binding;GO:0005516//calmodulin binding;GO:0042626//ATPase activity, coupled to transmembrane movement of substances	GO:0009506//plasmodesma;GO:0005886//plasma membrane;GO:0016021//integral to membrane
Unigene34411_All	623	GO:0055114//oxidation-reduction process;GO:0009932//cell tip growth;GO:0046854//phosphatidylinositol phosphorylation;GO:0006096//glycolysis;GO:0048765//root hair cell differentiation	GO:0004619//phosphoglycerate mutase activity;GO:0032440//2-alkenal reductase [NAD(P)] activity	GO:0009536//plastid
Unigene34573_All	529	GO:0080147//root hair cell development;GO:0006486//protein glycosylation;GO:0052325//cell wall pectin biosynthetic process	GO:0052636//arabinosyltransferase activity	GO:0005768//endosome;GO:0005802//trans-Golgi network;GO:0005794//Golgi apparatus
Unigene36310_All	2571	GO:0048765//root hair cell differentiation	GO:0004672//protein kinase activity	GO:0043231//intracellular membrane-bounded organelle;GO:0044444//cytoplasmic part
Unigene37476_All	1916	GO:0016567//protein ubiquitination;GO:0048589//developmental growth;GO:0048765//root hair cell differentiation	GO:0004842//ubiquitin-protein ligase activity	-
Unigene37732_All	2147	GO:0010090//trichome morphogenesis;GO:0071555//cell wall organization;GO:0007155//cell adhesion;GO:0048765//root hair cell differentiation;GO:0045010//actin nucleation	-	GO:0005737//cytoplasm
Unigene37752_All	308	GO:0010090//trichome morphogenesis;GO:0071555//cell wall organization;GO:0007155//cell adhesion;GO:0048765//root hair cell differentiation;GO:0045010//actin nucleation	GO:0005543//phospholipid binding	GO:0009506//plasmodesma;GO:0005773//vacuole;GO:0005794//Golgi apparatus;GO:0005886//plasma membrane
Unigene39142_All	4240	GO:0000278//mitotic cell cycle;GO:0048589//developmental growth;GO:0007155//cell adhesion;GO:0009825//multidimensional cell growth;GO:0045010//actin nucleation;GO:0048449//floral organ formation;GO:0003002//regionalization;GO:0010090//trichome morphogenesis;GO:0048765//root hair cell differentiation;GO:0045595//regulation of cell differentiation;GO:0010014//meristem initiation;GO:0045893//positiv…	GO:0005515//protein binding	GO:0031209//SCAR complex;GO:0005886//plasma membrane
Unigene39169_All	223	GO:0048768//root hair cell tip growth;GO:0060151//peroxisome localization;GO:0010154//fruit development;GO:0051301//cell division;GO:0009791//post-embryonic development;GO:0051646//mitochondrion localization;GO:0010091//trichome branching;GO:0051645//Golgi localization	GO:0042802//identical protein binding;GO:0005524//ATP binding;GO:0003774//motor activity;GO:0003779//actin binding	GO:0016459//myosin complex;GO:0005773//vacuole
Unigene39226_All	4158	GO:0000278//mitotic cell cycle;GO:0048589//developmental growth;GO:0007155//cell adhesion;GO:0009825//multidimensional cell growth;GO:0045010//actin nucleation;GO:0048449//floral organ formation;GO:0003002//regionalization;GO:0010090//trichome morphogenesis;GO:0048765//root hair cell differentiation;GO:0045595//regulation of cell differentiation;GO:0010014//meristem initiation;GO:0045893//positiv…	GO:0005515//protein binding	GO:0031209//SCAR complex;GO:0005886//plasma membrane
Unigene41103_All	1324	GO:0048589//developmental growth;GO:0010106//cellular response to iron ion starvation;GO:0015706//nitrate transport;GO:0006826//iron ion transport;GO:0048527//lateral root development;GO:0048765//root hair cell differentiation;GO:0010167//response to nitrate;GO:0010087//phloem or xylem histogenesis;GO:0016132//brassinosteroid biosynthetic process	GO:0003996//acyl-CoA ligase activity;GO:0016746//transferase activity, transferring acyl groups	GO:0005783//endoplasmic reticulum;GO:0005634//nucleus
Unigene42807_All	2644	GO:0006862//nucleotide transport;GO:0030243//cellulose metabolic process;GO:0006944//cellular membrane fusion;GO:0010363//regulation of plant-type hypersensitive response;GO:0015802//basic amino acid transport;GO:0006612//protein targeting to membrane;GO:0043069//negative regulation of programmed cell death;GO:0043090//amino acid import;GO:0030036//actin cytoskeleton organization;GO:0015696//ammo…	GO:0005525//GTP binding;GO:0016817//hydrolase activity, acting on acid anhydrides	GO:0005774//vacuolar membrane;GO:0016021//integral to membrane;GO:0005789//endoplasmic reticulum membrane;GO:0005886//plasma membrane;GO:0005634//nucleus
Unigene43056_All	1650	GO:0006355//regulation of transcription, DNA-dependent;GO:0051301//cell division;GO:0008284//positive regulation of cell proliferation;GO:0010224//response to UV-B;GO:0048768//root hair cell tip growth;GO:0010492//maintenance of shoot apical meristem identity;GO:0016573//histone acetylation;GO:0006281//DNA repair	GO:0008270//zinc ion binding;GO:0004402//histone acetyltransferase activity;GO:0003676//nucleic acid binding;GO:0003700//sequence-specific DNA binding transcription factor activity	GO:0005634//nucleus;GO:0005739//mitochondrion
Unigene43390_All	4945	GO:0000278//mitotic cell cycle;GO:0048589//developmental growth;GO:0007155//cell adhesion;GO:0009825//multidimensional cell growth;GO:0045010//actin nucleation;GO:0048449//floral organ formation;GO:0003002//regionalization;GO:0010090//trichome morphogenesis;GO:0048765//root hair cell differentiation;GO:0045595//regulation of cell differentiation;GO:0010014//meristem initiation;GO:0045893//positiv…	GO:0005515//protein binding	GO:0031209//SCAR complex;GO:0005886//plasma membrane
Unigene45416_All	897	GO:0080147//root hair cell development;GO:0006486//protein glycosylation;GO:0052325//cell wall pectin biosynthetic process	GO:0052636//arabinosyltransferase activity	GO:0005768//endosome;GO:0005802//trans-Golgi network;GO:0005783//endoplasmic reticulum;GO:0005794//Golgi apparatus;GO:0005634//nucleus
Unigene46530_All	1246	GO:0048768//root hair cell tip growth;GO:0010114//response to red light;GO:0009651//response to salt stress;GO:0009735//response to cytokinin stimulus;GO:0010218//response to far red light;GO:0009644//response to high light intensity	GO:0005507//copper ion binding;GO:0005524//ATP binding	GO:0005618//cell wall;GO:0005856//cytoskeleton;GO:0005739//mitochondrion;GO:0009507//chloroplast;GO:0005773//vacuole;GO:0005634//nucleus;GO:0005886//plasma membrane
Unigene46580_All	441	GO:0009750//response to fructose stimulus;GO:0042744//hydrogen peroxide catabolic process;GO:0006833//water transport;GO:0051410//detoxification of nitrogen compound;GO:0080147//root hair cell development;GO:0019288//isopentenyl diphosphate biosynthetic process, mevalonate-independent pathway;GO:0009651//response to salt stress;GO:0006972//hyperosmotic response;GO:0007030//Golgi organization;GO:0…	GO:0016740//transferase activity;GO:0004124//cysteine synthase activity;GO:0050017//L-3-cyanoalanine synthase activity;GO:0030170//pyridoxal phosphate binding;GO:0005507//copper ion binding	GO:0009507//chloroplast;GO:0005739//mitochondrion
Unigene4803_All	2575	GO:0006346//methylation-dependent chromatin silencing;GO:0007267//cell-cell signaling;GO:0007155//cell adhesion;GO:0045010//actin nucleation;GO:0080001//mucilage extrusion from seed coat;GO:0009855//determination of bilateral symmetry;GO:0010051//xylem and phloem pattern formation;GO:0048507//meristem development;GO:0010090//trichome morphogenesis;GO:0006306//DNA methylation;GO:0048765//root hair…	GO:0046982//protein heterodimerization activity	GO:0005737//cytoplasm;GO:0005634//nucleus
Unigene48597_All	660	GO:0006468//protein phosphorylation;GO:0048765//root hair cell differentiation	GO:0004672//protein kinase activity;GO:0005524//ATP binding	GO:0016021//integral to membrane;GO:0016023//cytoplasmic membrane-bounded vesicle
Unigene50349_All	481	GO:0090333//regulation of stomatal closure;GO:0010252//auxin homeostasis;GO:0009819//drought recovery;GO:0001558//regulation of cell growth;GO:0008283//cell proliferation;GO:0042742//defense response to bacterium;GO:0031117//positive regulation of microtubule depolymerization;GO:0048527//lateral root development;GO:0009790//embryo development;GO:0046686//response to cadmium ion;GO:0048768//root h…	GO:0008017//microtubule binding	GO:0005774//vacuolar membrane;GO:0048046//apoplast;GO:0009507//chloroplast;GO:0005794//Golgi apparatus;GO:0005829//cytosol;GO:0009579//thylakoid;GO:0090406//pollen tube;GO:0009506//plasmodesma;GO:0005886//plasma membrane;GO:0005634//nucleus
Unigene507_All	768	GO:0010090//trichome morphogenesis;GO:0071555//cell wall organization;GO:0007155//cell adhesion;GO:0048765//root hair cell differentiation;GO:0045010//actin nucleation	-	GO:0009506//plasmodesma;GO:0005773//vacuole;GO:0005794//Golgi apparatus;GO:0005886//plasma membrane
Unigene508_All	841	GO:0010090//trichome morphogenesis;GO:0071555//cell wall organization;GO:0007155//cell adhesion;GO:0048765//root hair cell differentiation;GO:0045010//actin nucleation	GO:0005543//phospholipid binding	GO:0009506//plasmodesma;GO:0005773//vacuole;GO:0005794//Golgi apparatus;GO:0005886//plasma membrane
Unigene52983_All	210	GO:0010026//trichome differentiation;GO:0006629//lipid metabolic process;GO:0006071//glycerol metabolic process;GO:0009932//cell tip growth;GO:0010442//guard cell morphogenesis;GO:0048765//root hair cell differentiation;GO:0052541//plant-type cell wall cellulose metabolic process	GO:0008889//glycerophosphodiester phosphodiesterase activity	GO:0009505//plant-type cell wall;GO:0016023//cytoplasmic membrane-bounded vesicle;GO:0046658//anchored to plasma membrane;GO:0009507//chloroplast;GO:0048046//apoplast
Unigene55271_All	215	GO:0051645//Golgi localization;GO:0010584//pollen exine formation;GO:0010154//fruit development;GO:0060151//peroxisome localization;GO:0030048//actin filament-based movement;GO:0051646//mitochondrion localization;GO:0009791//post-embryonic development;GO:0051301//cell division;GO:0030036//actin cytoskeleton organization;GO:0006468//protein phosphorylation;GO:0007165//signal transduction;GO:004876…	GO:0004871//signal transducer activity;GO:0003779//actin binding;GO:0004674//protein serine/threonine kinase activity;GO:0003774//motor activity;GO:0005524//ATP binding	GO:0016021//integral to membrane;GO:0005634//nucleus;GO:0016459//myosin complex
[truncated: 423 more rows]

## Sheet: Table S5
Table S5. List of disease-resistance unigenes among 1284 root-specific unigenes
[truncated: 104 more rows]

[truncated: 8 more sheets: Table S6, Table S7, Table S8, Table S9, Table S10, Table S11, Table S12, Table S13]
